# Supplementary material
Source: publisher figshare collection journal article supplement (https://acs.figshare.com/ndownloader/files/5689806)
Supplement: Supplementary file 1 [file 5689806]

# ic001314q.cif
  
data_d5 
  
_audit_creation_method            SHELXL-97 
_chemical_name_systematic 
; 
octakis(mu!3$-sulfido)-hexakis(tri-n-butylphosphine) 
-hexa-tungsten 
; 
_chemical_name_common             'Tungsten sulfide cluster with tri-n-' 
_chemical_melting_point           ? 
_chemical_formula_moiety          'W6 S8 (PC12H27)6' 
_chemical_formula_sum 
 'C72 H162 P6 S8 W6' 
_chemical_formula_weight          2573.42 
  
loop_ 
 _atom_type_symbol 
 _atom_type_description 
 _atom_type_scat_dispersion_real 
 _atom_type_scat_dispersion_imag 
 _atom_type_scat_source 
 'C'  'C'   0.0033   0.0016 
 'International Tables Vol C Tables 4.2.6.8 and 6.1.1.4' 
 'H'  'H'   0.0000   0.0000 
 'International Tables Vol C Tables 4.2.6.8 and 6.1.1.4' 
 'P'  'P'   0.1023   0.0942 
 'International Tables Vol C Tables 4.2.6.8 and 6.1.1.4' 
 'S'  'S'   0.1246   0.1234 
 'International Tables Vol C Tables 4.2.6.8 and 6.1.1.4' 
 'W'  'W'  -0.8490   6.8722 
 'International Tables Vol C Tables 4.2.6.8 and 6.1.1.4' 
  
_symmetry_cell_setting            Monoclinic 
_symmetry_space_group_name_H-M    'C 2/c' 
  
loop_ 
 _symmetry_equiv_pos_as_xyz 
 'x, y, z' 
 '-x, y, -z+1/2' 
 'x+1/2, y+1/2, z' 
 '-x+1/2, y+1/2, -z+1/2' 
 '-x, -y, -z' 
 'x, -y, z-1/2' 
 '-x+1/2, -y+1/2, -z' 
 'x+1/2, -y+1/2, z-1/2' 
  
_cell_length_a                    24.6648(12) 
_cell_length_b                    19.8619(9) 
_cell_length_c                    20.1365(10) 
_cell_angle_alpha                 90.00 
_cell_angle_beta                  103.3240(10) 
_cell_angle_gamma                 90.00 
_cell_volume                      9599.1(8) 
_cell_formula_units_Z             4 
_cell_measurement_temperature     163(2) 
_cell_measurement_reflns_used     ? 
_cell_measurement_theta_min       ? 
_cell_measurement_theta_max       ? 
  
_exptl_crystal_description        block 
_exptl_crystal_colour             red 
_exptl_crystal_size_max           0.4 
_exptl_crystal_size_mid           0.3 
_exptl_crystal_size_min           0.3 
_exptl_crystal_density_meas       'NOT MEASURED' 
_exptl_crystal_density_diffrn     1.781 
_exptl_crystal_density_method     'not measured' 
_exptl_crystal_F_000              5024 
_exptl_absorpt_coefficient_mu     7.469 
_exptl_absorpt_correction_type    empirical 
_exptl_absorpt_correction_T_min   0.529617 
_exptl_absorpt_correction_T_max   1 
_exptl_absorpt_process_details    ? 
  
_exptl_special_details 
; 
octakis(mu!3$-sulfido)-hexakis(tri-n-butylphosphine) 
-hexa-tungsten 
; 
  
_diffrn_ambient_temperature       163(2) 
_diffrn_radiation_wavelength      0.71073 
_diffrn_radiation_type            MoK\a 
_diffrn_radiation_source          'fine-focus sealed tube' 
_diffrn_radiation_monochromator   graphite 
_diffrn_measurement_device_type   ? 
_diffrn_measurement_method        '\w scans' 
_diffrn_detector_area_resol_mean  ? 
_diffrn_standards_number          ? 
_diffrn_standards_interval_count  ? 
_diffrn_standards_interval_time   ? 
_diffrn_standards_decay_%         0 
_diffrn_reflns_number             67732 
_diffrn_reflns_av_R_equivalents   0.0351 
_diffrn_reflns_av_sigmaI/netI     0.0331 
_diffrn_reflns_limit_h_min        -37 
_diffrn_reflns_limit_h_max        31 
_diffrn_reflns_limit_k_min        -30 
_diffrn_reflns_limit_k_max        29 
_diffrn_reflns_limit_l_min        -30 
_diffrn_reflns_limit_l_max        28 
_diffrn_reflns_theta_min          1.56 
_diffrn_reflns_theta_max          33.22 
_reflns_number_total              17073 
_reflns_number_gt                 13885 
_reflns_threshold_expression      >2sigma(I) 
  
_computing_data_collection        'BRUKER SMART' 
_computing_cell_refinement        'Bruker SAINT' 
_computing_data_reduction         SHELXTL 
_computing_structure_solution     'SHELXS-97 (Sheldrick, 1990)' 
_computing_structure_refinement   'SHELXL-97 (Sheldrick, 1997)' 
_computing_molecular_graphics     SHELXTL 
_computing_publication_material   SHELXTL 
  
_refine_special_details 
; 
 Refinement of F^2^ against ALL reflections.  The weighted R-factor wR and 
 goodness of fit S are based on F^2^, conventional R-factors R are based 
 on F, with F set to zero for negative F^2^. The threshold expression of 
 F^2^ > 2sigma(F^2^) is used only for calculating R-factors(gt) etc. and is 
 not relevant to the choice of reflections for refinement.  R-factors based 
 on F^2^ are statistically about twice as large as those based on F, and R- 
 factors based on ALL data will be even larger. 
  
 There were some disorder for some butyl groups of the P-n-Bu3 ligands, 
 which were all modelled successfully. 
 Hydrogen atoms were added based on riding models though some H atoms 
 were even visible in Fourier difference maps. 
  
 Anisotropic refinements were performed on all non-hydrogen atoms. 
  
; 
  
_refine_ls_structure_factor_coef  Fsqd 
_refine_ls_matrix_type            full 
_refine_ls_weighting_scheme       calc 
_refine_ls_weighting_details 
 'calc w=1/[\s^2^(Fo^2^)+(0.0273P)^2^+0.0000P] where P=(Fo^2^+2Fc^2^)/3' 
_atom_sites_solution_primary      direct 
_atom_sites_solution_secondary    difmap 
_atom_sites_solution_hydrogens    geom 
_refine_ls_hydrogen_treatment     mixed 
_refine_ls_extinction_method      none 
_refine_ls_extinction_coef        ? 
_refine_ls_number_reflns          17073 
_refine_ls_number_parameters      581 
_refine_ls_number_restraints      0 
_refine_ls_R_factor_all           0.0396 
_refine_ls_R_factor_gt            0.0250 
_refine_ls_wR_factor_ref          0.0590 
_refine_ls_wR_factor_gt           0.0506 
_refine_ls_goodness_of_fit_ref    1.089 
_refine_ls_restrained_S_all       1.089 
_refine_ls_shift/su_max           0.045 
_refine_ls_shift/su_mean          0.002 
  
loop_ 
 _atom_site_label 
 _atom_site_type_symbol 
 _atom_site_fract_x 
 _atom_site_fract_y 
 _atom_site_fract_z 
 _atom_site_U_iso_or_equiv 
 _atom_site_adp_type 
 _atom_site_occupancy 
 _atom_site_symmetry_multiplicity 
 _atom_site_calc_flag 
 _atom_site_refinement_flags 
 _atom_site_disorder_assembly 
 _atom_site_disorder_group 
W1 W 0.221998(5) 0.661077(5) 0.487536(5) 0.01761(3) Uani 1 1 d . . . 
W2 W 0.318507(5) 0.720290(5) 0.483260(5) 0.01700(3) Uani 1 1 d . . . 
W3 W 0.277213(5) 0.732942(5) 0.594292(5) 0.01748(3) Uani 1 1 d . . . 
S1 S 0.31176(3) 0.62583(3) 0.55952(4) 0.02175(14) Uani 1 1 d . . . 
S2 S 0.26217(3) 0.65700(3) 0.38643(4) 0.02124(14) Uani 1 1 d . . . 
S3 S 0.13662(3) 0.71088(4) 0.41763(4) 0.02330(14) Uani 1 1 d . . . 
S4 S 0.18644(3) 0.68070(4) 0.59069(4) 0.02235(14) Uani 1 1 d . . . 
P1 P 0.18736(4) 0.54149(4) 0.47100(4) 0.02516(16) Uani 1 1 d . . . 
P2 P 0.41114(3) 0.68164(4) 0.46487(4) 0.02415(15) Uani 1 1 d . . . 
P3 P 0.31241(4) 0.70392(5) 0.71849(4) 0.03089(19) Uani 1 1 d . . . 
C101 C 0.1333(4) 0.5201(4) 0.5175(5) 0.0234(16) Uani 0.533(8) 1 d P A 1 
H10A H 0.1237 0.4719 0.5093 0.028 Uiso 0.533(8) 1 calc PR A 1 
H10B H 0.1495 0.5255 0.5669 0.028 Uiso 0.533(8) 1 calc PR A 1 
C102 C 0.0800(3) 0.5605(3) 0.4994(4) 0.0297(15) Uani 0.533(8) 1 d P A 1 
H10C H 0.0610 0.5508 0.4514 0.036 Uiso 0.533(8) 1 calc PR A 1 
H10Z H 0.0895 0.6090 0.5026 0.036 Uiso 0.533(8) 1 calc PR A 1 
C103 C 0.0396(3) 0.5458(4) 0.5453(4) 0.046(2) Uani 0.533(8) 1 d P A 1 
H10D H 0.0044 0.5707 0.5277 0.056 Uiso 0.533(8) 1 calc PR A 1 
H10E H 0.0308 0.4971 0.5433 0.056 Uiso 0.533(8) 1 calc PR A 1 
C104 C 0.0624(4) 0.5650(6) 0.6156(6) 0.061(3) Uani 0.533(8) 1 d P A 1 
H10F H 0.0352 0.5551 0.6429 0.091 Uiso 0.533(8) 1 calc PR A 1 
H10G H 0.0708 0.6133 0.6179 0.091 Uiso 0.533(8) 1 calc PR A 1 
H10H H 0.0967 0.5395 0.6336 0.091 Uiso 0.533(8) 1 calc PR A 1 
C11' C 0.1512(5) 0.5088(7) 0.5335(7) 0.038(3) Uani 0.467(8) 1 d P A 2 
H11H H 0.1430 0.4605 0.5240 0.046 Uiso 0.467(8) 1 calc PR A 2 
H11I H 0.1763 0.5122 0.5795 0.046 Uiso 0.467(8) 1 calc PR A 2 
C12' C 0.0974(5) 0.5450(5) 0.5340(6) 0.050(3) Uani 0.467(8) 1 d P A 2 
H12A H 0.0694 0.5362 0.4910 0.060 Uiso 0.467(8) 1 calc PR A 2 
H12Z H 0.1039 0.5942 0.5384 0.060 Uiso 0.467(8) 1 calc PR A 2 
C13' C 0.0750(5) 0.5158(5) 0.6005(5) 0.090(5) Uani 0.467(8) 1 d P A 2 
H13A H 0.0616 0.4689 0.5925 0.03(2) Uiso 0.467(8) 1 calc PR A 2 
H13B H 0.1051 0.5172 0.6426 0.25(11) Uiso 0.467(8) 1 calc PR A 2 
C14' C 0.0282(5) 0.5624(5) 0.6060(5) 0.082(5) Uani 0.467(8) 1 d PR A 2 
H14A H 0.0124 0.5484 0.6443 0.099 Uiso 0.467(8) 1 calc PR A 2 
H14B H -0.0008 0.5607 0.5636 0.099 Uiso 0.467(8) 1 calc PR A 2 
H14C H 0.0425 0.6085 0.6137 0.099 Uiso 0.467(8) 1 calc PR A 2 
C105 C 0.15063(15) 0.51964(15) 0.38377(17) 0.0318(7) Uani 1 1 d . A . 
H10I H 0.1173 0.5488 0.3710 0.038 Uiso 1 1 calc R . . 
H10Y H 0.1752 0.5310 0.3529 0.038 Uiso 1 1 calc R . . 
C106 C 0.13194(17) 0.44700(17) 0.37022(19) 0.0426(9) Uani 1 1 d . . . 
H10J H 0.1652 0.4175 0.3806 0.051 Uiso 1 1 calc R A . 
H10K H 0.1080 0.4346 0.4016 0.051 Uiso 1 1 calc R . . 
C107 C 0.10028(19) 0.4340(2) 0.2979(2) 0.0516(11) Uani 1 1 d . A . 
H10L H 0.0659 0.4615 0.2883 0.062 Uiso 1 1 calc R . . 
H10M H 0.1233 0.4487 0.2663 0.062 Uiso 1 1 calc R . . 
C108 C 0.0847(2) 0.3611(2) 0.2838(2) 0.0760(18) Uani 1 1 d . . . 
H10N H 0.0642 0.3561 0.2362 0.114 Uiso 1 1 calc R A . 
H10O H 0.0611 0.3463 0.3141 0.114 Uiso 1 1 calc R . . 
H10P H 0.1185 0.3336 0.2919 0.114 Uiso 1 1 calc R . . 
C109 C 0.24167(15) 0.47756(15) 0.49410(17) 0.0333(8) Uani 1 1 d . A . 
H10Q H 0.2599 0.4831 0.5430 0.040 Uiso 1 1 calc R . . 
H10R H 0.2237 0.4327 0.4886 0.040 Uiso 1 1 calc R . . 
C110 C 0.28632(15) 0.47870(16) 0.45350(17) 0.0333(8) Uani 1 1 d . . . 
H11A H 0.2982 0.5258 0.4491 0.040 Uiso 1 1 calc R A . 
H11B H 0.2706 0.4611 0.4071 0.040 Uiso 1 1 calc R . . 
C111 C 0.33680(18) 0.4367(2) 0.4873(2) 0.0528(11) Uani 1 1 d . A . 
H11C H 0.3520 0.4539 0.5340 0.063 Uiso 1 1 calc R . . 
H11D H 0.3248 0.3896 0.4912 0.063 Uiso 1 1 calc R . . 
C112 C 0.38193(18) 0.4376(2) 0.4487(3) 0.0576(12) Uani 1 1 d . . . 
H11E H 0.4133 0.4099 0.4728 0.086 Uiso 1 1 calc R A . 
H11F H 0.3946 0.4839 0.4454 0.086 Uiso 1 1 calc R . . 
H11G H 0.3675 0.4194 0.4028 0.086 Uiso 1 1 calc R . . 
C201 C 0.4087(5) 0.6477(5) 0.3791(6) 0.0270(17) Uani 0.734(12) 1 d P B 1 
H20A H 0.4459 0.6295 0.3784 0.032 Uiso 0.734(12) 1 calc PR B 1 
H20B H 0.3820 0.6096 0.3707 0.032 Uiso 0.734(12) 1 calc PR B 1 
C202 C 0.3920(3) 0.6979(3) 0.3214(3) 0.0305(12) Uani 0.734(12) 1 d P B 1 
H20C H 0.3598 0.7242 0.3289 0.037 Uiso 0.734(12) 1 calc PR B 1 
H20D H 0.4232 0.7297 0.3235 0.037 Uiso 0.734(12) 1 calc PR B 1 
C203 C 0.3766(3) 0.6683(3) 0.2508(3) 0.0493(19) Uani 0.734(12) 1 d P B 1 
H20E H 0.3465 0.6349 0.2490 0.059 Uiso 0.734(12) 1 calc PR B 1 
H20F H 0.3617 0.7046 0.2179 0.059 Uiso 0.734(12) 1 calc PR B 1 
C204 C 0.4236(6) 0.6351(7) 0.2287(5) 0.174(8) Uani 0.734(12) 1 d P B 1 
H20G H 0.4104 0.6172 0.1825 0.261 Uiso 0.734(12) 1 calc PR B 1 
H20H H 0.4380 0.5981 0.2601 0.261 Uiso 0.734(12) 1 calc PR B 1 
H20I H 0.4532 0.6680 0.2292 0.261 Uiso 0.734(12) 1 calc PR B 1 
C21' C 0.4144(14) 0.6309(13) 0.3902(18) 0.027(4) Uani 0.266(12) 1 d P B 2 
H21F H 0.4516 0.6094 0.3977 0.032 Uiso 0.266(12) 1 calc PR B 2 
H21G H 0.3862 0.5946 0.3849 0.032 Uiso 0.266(12) 1 calc PR B 2 
C22' C 0.4042(8) 0.6725(11) 0.3247(9) 0.037(4) Uani 0.266(12) 1 d P B 2 
H22A H 0.3672 0.6942 0.3176 0.044 Uiso 0.266(12) 1 calc PR B 2 
H22B H 0.4325 0.7087 0.3303 0.044 Uiso 0.266(12) 1 calc PR B 2 
C23' C 0.4065(8) 0.6313(9) 0.2611(9) 0.050(5) Uani 0.266(12) 1 d P B 2 
H23A H 0.4412 0.6045 0.2713 0.060 Uiso 0.266(12) 1 calc PR B 2 
H23B H 0.3749 0.5992 0.2525 0.060 Uiso 0.266(12) 1 calc PR B 2 
C24' C 0.4045(10) 0.6679(14) 0.2005(10) 0.083(8) Uani 0.266(12) 1 d P B 2 
H24A H 0.4035 0.6365 0.1627 0.099 Uiso 0.266(12) 1 calc PR B 2 
H24B H 0.4376 0.6965 0.2063 0.099 Uiso 0.266(12) 1 calc PR B 2 
H24C H 0.3710 0.6962 0.1904 0.099 Uiso 0.266(12) 1 calc PR B 2 
C205 C 0.44569(15) 0.61636(17) 0.52372(18) 0.0344(7) Uani 1 1 d . B . 
H20J H 0.4201 0.5776 0.5208 0.041 Uiso 1 1 calc R . . 
H20K H 0.4790 0.6007 0.5085 0.041 Uiso 1 1 calc R . . 
C206 C 0.46383(18) 0.6381(2) 0.59829(19) 0.0463(10) Uani 1 1 d . . . 
H20L H 0.4302 0.6485 0.6153 0.056 Uiso 0.52(2) 1 calc PR B 1 
H20M H 0.4858 0.6801 0.6007 0.056 Uiso 0.52(2) 1 calc PR B 1 
H20R H 0.5004 0.6610 0.6056 0.056 Uiso 0.48(2) 1 calc PR B 2 
H20S H 0.4366 0.6709 0.6083 0.056 Uiso 0.48(2) 1 calc PR B 2 
C207 C 0.4992(5) 0.5848(7) 0.6465(6) 0.057(3) Uani 0.52(2) 1 d P B 1 
H20N H 0.5321 0.5718 0.6290 0.068 Uiso 0.52(2) 1 calc PR B 1 
H20X H 0.5126 0.6040 0.6928 0.068 Uiso 0.52(2) 1 calc PR B 1 
C208 C 0.4622(7) 0.5219(6) 0.6497(6) 0.068(4) Uani 0.52(2) 1 d P B 1 
H20P H 0.4834 0.4890 0.6817 0.102 Uiso 0.52(2) 1 calc PR B 1 
H20Q H 0.4510 0.5016 0.6042 0.102 Uiso 0.52(2) 1 calc PR B 1 
H20R H 0.4289 0.5355 0.6651 0.102 Uiso 0.52(2) 1 calc PR B 1 
C27' C 0.4685(12) 0.5791(9) 0.6475(7) 0.090(7) Uani 0.48(2) 1 d P B 2 
H27A H 0.4817 0.5976 0.6941 0.108 Uiso 0.48(2) 1 calc PR B 2 
H27B H 0.4302 0.5623 0.6443 0.108 Uiso 0.48(2) 1 calc PR B 2 
C28' C 0.5010(12) 0.5240(8) 0.6425(8) 0.117(9) Uani 0.48(2) 1 d P B 2 
H28A H 0.4951 0.4893 0.6747 0.175 Uiso 0.48(2) 1 calc PR B 2 
H28B H 0.5404 0.5374 0.6534 0.175 Uiso 0.48(2) 1 calc PR B 2 
H28C H 0.4909 0.5061 0.5960 0.175 Uiso 0.48(2) 1 calc PR B 2 
C209 C 0.46358(13) 0.74862(16) 0.47293(18) 0.0300(7) Uani 1 1 d . B . 
H20O H 0.4489 0.7834 0.4382 0.036 Uiso 1 1 calc R . . 
H20W H 0.4675 0.7699 0.5182 0.036 Uiso 1 1 calc R . . 
C210 C 0.52155(15) 0.72880(19) 0.4654(2) 0.0405(8) Uani 1 1 d . . . 
H20S H 0.5375 0.6958 0.5014 0.049 Uiso 1 1 calc R B . 
H20T H 0.5181 0.7063 0.4207 0.049 Uiso 1 1 calc R . . 
C211 C 0.56111(17) 0.7870(2) 0.4700(2) 0.0517(11) Uani 1 1 d . B . 
H21A H 0.5650 0.8093 0.5149 0.062 Uiso 1 1 calc R . . 
H21B H 0.5452 0.8203 0.4342 0.062 Uiso 1 1 calc R . . 
C212 C 0.61794(18) 0.7662(3) 0.4618(3) 0.0619(13) Uani 1 1 d . . . 
H21C H 0.6419 0.8060 0.4652 0.093 Uiso 1 1 calc R B . 
H21D H 0.6145 0.7450 0.4170 0.093 Uiso 1 1 calc R . . 
H21E H 0.6343 0.7341 0.4977 0.093 Uiso 1 1 calc R . . 
C301 C 0.3311(6) 0.6203(6) 0.7393(5) 0.033(2) Uani 0.64(3) 1 d P C 1 
H30A H 0.3577 0.6049 0.7123 0.040 Uiso 0.64(3) 1 calc PR C 1 
H30B H 0.3500 0.6173 0.7883 0.040 Uiso 0.64(3) 1 calc PR C 1 
C302 C 0.2795(7) 0.5741(5) 0.7247(6) 0.039(3) Uani 0.64(3) 1 d P C 1 
H30C H 0.2536 0.5894 0.7526 0.047 Uiso 0.64(3) 1 calc PR C 1 
H30D H 0.2601 0.5788 0.6761 0.047 Uiso 0.64(3) 1 calc PR C 1 
C303 C 0.2925(9) 0.5014(5) 0.7395(5) 0.051(4) Uani 0.64(3) 1 d P C 1 
H30E H 0.3132 0.4967 0.7876 0.062 Uiso 0.64(3) 1 calc PR C 1 
H30F H 0.3171 0.4854 0.7102 0.062 Uiso 0.64(3) 1 calc PR C 1 
C304 C 0.2418(9) 0.4574(5) 0.7277(7) 0.062(4) Uani 0.64(3) 1 d P C 1 
H30G H 0.2530 0.4105 0.7383 0.093 Uiso 0.64(3) 1 calc PR C 1 
H30H H 0.2215 0.4607 0.6799 0.093 Uiso 0.64(3) 1 calc PR C 1 
H30I H 0.2176 0.4721 0.7573 0.093 Uiso 0.64(3) 1 calc PR C 1 
C31' C 0.3148(7) 0.6045(8) 0.7326(7) 0.016(2) Uani 0.36(3) 1 d P C 2 
H31H H 0.3410 0.5852 0.7071 0.019 Uiso 0.36(3) 1 calc PR C 2 
H31Z H 0.3304 0.5955 0.7816 0.019 Uiso 0.36(3) 1 calc PR C 2 
C32' C 0.2585(8) 0.5665(9) 0.7105(9) 0.026(3) Uani 0.36(3) 1 d P C 2 
H32A H 0.2437 0.5714 0.6607 0.031 Uiso 0.36(3) 1 calc PR C 2 
H32B H 0.2311 0.5861 0.7340 0.031 Uiso 0.36(3) 1 calc PR C 2 
C33' C 0.2674(8) 0.4899(7) 0.7294(9) 0.032(3) Uani 0.36(3) 1 d P C 2 
H33A H 0.2948 0.4707 0.7057 0.038 Uiso 0.36(3) 1 calc PR C 2 
H33B H 0.2827 0.4854 0.7791 0.038 Uiso 0.36(3) 1 calc PR C 2 
C34' C 0.2131(9) 0.4505(7) 0.7093(8) 0.039(4) Uani 0.36(3) 1 d P C 2 
H34A H 0.2202 0.4030 0.7214 0.058 Uiso 0.36(3) 1 calc PR C 2 
H34B H 0.1980 0.4544 0.6600 0.058 Uiso 0.36(3) 1 calc PR C 2 
H34C H 0.1862 0.4687 0.7335 0.058 Uiso 0.36(3) 1 calc PR C 2 
C305 C 0.3817(3) 0.7501(4) 0.7583(4) 0.0340(18) Uani 0.610(10) 1 d P C 1 
H30J H 0.3969 0.7315 0.8045 0.041 Uiso 0.610(10) 1 calc PR C 1 
H30K H 0.4089 0.7402 0.7303 0.041 Uiso 0.610(10) 1 calc PR C 1 
C306 C 0.3768(3) 0.8273(4) 0.7643(4) 0.0363(16) Uani 0.610(10) 1 d P C 1 
H30L H 0.3510 0.8444 0.7225 0.044 Uiso 0.610(10) 1 calc PR C 1 
H30Z H 0.3602 0.8376 0.8035 0.044 Uiso 0.610(10) 1 calc PR C 1 
C307 C 0.4315(3) 0.8638(4) 0.7736(4) 0.058(2) Uani 0.610(10) 1 d P C 1 
H30M H 0.4474 0.8546 0.7337 0.069 Uiso 0.610(10) 1 calc PR C 1 
H30N H 0.4246 0.9128 0.7748 0.069 Uiso 0.610(10) 1 calc PR C 1 
C308 C 0.4733(4) 0.8442(6) 0.8373(5) 0.092(4) Uani 0.610(10) 1 d P C 1 
H30O H 0.5075 0.8704 0.8408 0.138 Uiso 0.610(10) 1 calc PR C 1 
H30P H 0.4818 0.7961 0.8356 0.138 Uiso 0.610(10) 1 calc PR C 1 
H30Q H 0.4579 0.8532 0.8772 0.138 Uiso 0.610(10) 1 calc PR C 1 
C35' C 0.3787(5) 0.7217(5) 0.7626(6) 0.025(2) Uani 0.390(10) 1 d P C 2 
H35A H 0.3867 0.6972 0.8066 0.030 Uiso 0.390(10) 1 calc PR C 2 
H35B H 0.4055 0.7063 0.7361 0.030 Uiso 0.390(10) 1 calc PR C 2 
C36' C 0.3862(4) 0.7979(5) 0.7763(5) 0.0246(19) Uani 0.390(10) 1 d P C 2 
H36A H 0.3767 0.8222 0.7322 0.030 Uiso 0.390(10) 1 calc PR C 2 
H36B H 0.3598 0.8127 0.8037 0.030 Uiso 0.390(10) 1 calc PR C 2 
C37' C 0.4451(4) 0.8163(5) 0.8137(6) 0.046(3) Uani 0.390(10) 1 d P C 2 
H37A H 0.4554 0.7898 0.8564 0.055 Uiso 0.390(10) 1 calc PR C 2 
H37B H 0.4712 0.8041 0.7849 0.055 Uiso 0.390(10) 1 calc PR C 2 
C38' C 0.4515(6) 0.8908(6) 0.8310(8) 0.067(4) Uani 0.390(10) 1 d P C 2 
H38A H 0.4901 0.9000 0.8552 0.100 Uiso 0.390(10) 1 calc PR C 2 
H38B H 0.4263 0.9032 0.8601 0.100 Uiso 0.390(10) 1 calc PR C 2 
H38C H 0.4424 0.9173 0.7888 0.100 Uiso 0.390(10) 1 calc PR C 2 
C309 C 0.26647(14) 0.72969(16) 0.77369(15) 0.0286(7) Uani 1 1 d . C . 
H30R H 0.2629 0.7793 0.7715 0.034 Uiso 1 1 calc R . . 
H30S H 0.2290 0.7106 0.7547 0.034 Uiso 1 1 calc R . . 
C310 C 0.28445(17) 0.70919(19) 0.84890(17) 0.0401(9) Uani 1 1 d . . . 
H31A H 0.2864 0.6595 0.8518 0.048 Uiso 1 1 calc R C . 
H31B H 0.3223 0.7269 0.8681 0.048 Uiso 1 1 calc R . . 
C311 C 0.24542(17) 0.73457(19) 0.89221(18) 0.0403(9) Uani 1 1 d . C . 
H31C H 0.2070 0.7199 0.8709 0.048 Uiso 1 1 calc R . . 
H31D H 0.2562 0.7135 0.9379 0.048 Uiso 1 1 calc R . . 
C312 C 0.24594(19) 0.8098(2) 0.9005(2) 0.0477(10) Uani 1 1 d . . . 
H31E H 0.2202 0.8227 0.9288 0.072 Uiso 1 1 calc R C . 
H31F H 0.2343 0.8311 0.8556 0.072 Uiso 1 1 calc R . . 
H31G H 0.2837 0.8247 0.9225 0.072 Uiso 1 1 calc R . . 
  
loop_ 
 _atom_site_aniso_label 
 _atom_site_aniso_U_11 
 _atom_site_aniso_U_22 
 _atom_site_aniso_U_33 
 _atom_site_aniso_U_23 
 _atom_site_aniso_U_13 
 _atom_site_aniso_U_12 
W1 0.01963(6) 0.01538(5) 0.01926(5) -0.00059(4) 0.00741(4) -0.00143(4) 
W2 0.01750(6) 0.01722(5) 0.01737(5) -0.00004(4) 0.00626(4) 0.00013(4) 
W3 0.01970(6) 0.01794(5) 0.01551(5) 0.00054(4) 0.00549(4) 0.00091(4) 
S1 0.0252(4) 0.0197(3) 0.0216(3) 0.0028(2) 0.0080(3) 0.0040(3) 
S2 0.0242(4) 0.0207(3) 0.0198(3) -0.0031(2) 0.0072(3) -0.0006(2) 
S3 0.0191(4) 0.0270(3) 0.0234(3) -0.0045(3) 0.0041(3) -0.0019(3) 
S4 0.0260(4) 0.0206(3) 0.0233(3) 0.0013(2) 0.0114(3) -0.0020(3) 
P1 0.0318(5) 0.0181(3) 0.0286(4) -0.0015(3) 0.0133(3) -0.0041(3) 
P2 0.0211(4) 0.0261(4) 0.0270(4) -0.0009(3) 0.0091(3) 0.0022(3) 
P3 0.0338(5) 0.0426(5) 0.0170(4) 0.0040(3) 0.0075(3) 0.0157(4) 
C101 0.017(5) 0.019(3) 0.039(5) 0.003(3) 0.016(3) 0.001(3) 
C102 0.028(4) 0.031(3) 0.034(4) 0.000(3) 0.014(3) -0.003(3) 
C103 0.044(5) 0.042(4) 0.063(5) 0.006(4) 0.032(4) 0.000(3) 
C104 0.048(6) 0.069(6) 0.075(7) -0.005(5) 0.035(6) -0.007(5) 
C11' 0.028(7) 0.038(6) 0.050(7) 0.000(4) 0.011(5) -0.005(4) 
C12' 0.045(6) 0.042(5) 0.057(7) 0.001(4) 0.000(5) -0.019(4) 
C13' 0.087(10) 0.124(13) 0.062(8) -0.050(8) 0.025(7) -0.003(9) 
C14' 0.136(15) 0.066(8) 0.061(8) -0.006(6) 0.054(10) -0.011(10) 
C105 0.034(2) 0.0225(14) 0.0368(18) -0.0027(12) 0.0032(14) -0.0031(12) 
C106 0.052(2) 0.0265(16) 0.043(2) -0.0046(14) -0.0026(17) -0.0082(15) 
C107 0.062(3) 0.042(2) 0.044(2) -0.0078(17) -0.0041(19) -0.0134(19) 
C108 0.111(5) 0.046(3) 0.052(3) -0.016(2) -0.019(3) -0.012(3) 
C109 0.046(2) 0.0196(14) 0.0322(17) 0.0040(12) 0.0040(14) -0.0018(13) 
C110 0.037(2) 0.0243(15) 0.0360(18) -0.0045(13) 0.0030(14) 0.0078(13) 
C111 0.044(3) 0.043(2) 0.069(3) 0.015(2) 0.006(2) 0.0122(18) 
C112 0.042(3) 0.047(2) 0.081(3) -0.011(2) 0.007(2) 0.0113(19) 
C201 0.030(3) 0.025(5) 0.029(4) 0.001(3) 0.012(3) 0.007(3) 
C202 0.033(3) 0.033(3) 0.027(2) 0.000(2) 0.011(2) 0.005(2) 
C203 0.069(5) 0.046(3) 0.029(3) -0.004(2) 0.004(3) 0.015(3) 
C204 0.228(16) 0.261(17) 0.042(6) 0.027(8) 0.049(8) 0.182(14) 
C21' 0.033(12) 0.014(10) 0.036(13) 0.001(7) 0.014(9) -0.001(7) 
C22' 0.029(9) 0.042(11) 0.040(9) 0.001(8) 0.010(6) 0.015(7) 
C23' 0.043(11) 0.056(11) 0.054(11) 0.019(8) 0.018(8) -0.004(8) 
C24' 0.072(16) 0.14(2) 0.035(11) -0.016(12) 0.013(10) 0.008(14) 
C205 0.0283(19) 0.0326(17) 0.044(2) 0.0031(14) 0.0112(14) 0.0087(13) 
C206 0.046(3) 0.048(2) 0.040(2) 0.0087(17) 0.0001(17) 0.0079(18) 
C207 0.018(5) 0.090(8) 0.063(6) 0.035(5) 0.010(4) 0.015(5) 
C208 0.071(9) 0.061(7) 0.077(7) 0.042(5) 0.027(6) 0.030(6) 
C27' 0.117(18) 0.095(12) 0.054(7) 0.026(7) 0.012(9) 0.053(12) 
C28' 0.15(2) 0.101(12) 0.108(12) 0.051(9) 0.047(12) 0.087(13) 
C209 0.0201(16) 0.0326(16) 0.0385(18) -0.0018(13) 0.0093(13) -0.0007(12) 
C210 0.0266(19) 0.049(2) 0.049(2) 0.0014(17) 0.0169(16) 0.0019(15) 
C211 0.028(2) 0.061(3) 0.070(3) 0.010(2) 0.0203(19) -0.0047(18) 
C212 0.028(2) 0.091(4) 0.069(3) 0.023(3) 0.015(2) -0.001(2) 
C301 0.042(6) 0.030(5) 0.029(3) 0.004(3) 0.011(4) 0.005(4) 
C302 0.062(9) 0.031(4) 0.025(4) 0.009(3) 0.014(5) 0.019(5) 
C303 0.091(11) 0.027(4) 0.036(4) 0.007(3) 0.015(5) 0.007(5) 
C304 0.109(13) 0.032(4) 0.055(6) 0.006(4) 0.035(7) 0.004(6) 
C31' 0.017(6) 0.011(5) 0.017(4) 0.003(3) 0.001(4) -0.003(4) 
C32' 0.031(8) 0.024(5) 0.021(6) 0.002(4) 0.002(5) 0.002(5) 
C33' 0.037(9) 0.015(5) 0.041(7) 0.007(4) 0.004(6) -0.006(5) 
C34' 0.052(10) 0.030(5) 0.035(7) 0.004(4) 0.012(6) -0.016(6) 
C305 0.030(4) 0.049(5) 0.022(3) 0.008(4) 0.003(2) 0.007(4) 
C306 0.034(4) 0.039(4) 0.034(3) -0.004(3) 0.004(3) 0.000(3) 
C307 0.046(5) 0.064(5) 0.056(5) 0.001(4) -0.004(3) -0.009(4) 
C308 0.069(7) 0.116(10) 0.071(7) 0.003(6) -0.026(5) -0.023(6) 
C35' 0.029(5) 0.026(5) 0.021(4) 0.007(4) 0.007(3) 0.002(4) 
C36' 0.028(5) 0.016(4) 0.028(4) -0.005(4) 0.003(3) 0.002(3) 
C37' 0.019(5) 0.047(6) 0.070(8) -0.022(5) 0.006(5) -0.007(4) 
C38' 0.050(8) 0.044(7) 0.104(12) -0.030(7) 0.013(7) -0.019(6) 
C309 0.0320(18) 0.0340(16) 0.0211(14) 0.0019(12) 0.0085(12) 0.0095(13) 
C310 0.051(2) 0.051(2) 0.0215(16) 0.0055(14) 0.0145(15) 0.0200(18) 
C311 0.048(2) 0.053(2) 0.0233(16) 0.0026(15) 0.0155(15) 0.0113(17) 
C312 0.058(3) 0.053(2) 0.035(2) -0.0089(17) 0.0165(18) 0.006(2) 
  
_geom_special_details 
; 
 All esds (except the esd in the dihedral angle between two l.s. planes) 
 are estimated using the full covariance matrix.  The cell esds are taken 
 into account individually in the estimation of esds in distances, angles 
 and torsion angles; correlations between esds in cell parameters are only 
 used when they are defined by crystal symmetry.  An approximate (isotropic) 
 treatment of cell esds is used for estimating esds involving l.s. planes. 
; 
  
loop_ 
 _geom_bond_atom_site_label_1 
 _geom_bond_atom_site_label_2 
 _geom_bond_distance 
 _geom_bond_site_symmetry_2 
 _geom_bond_publ_flag 
W1 S1 2.4522(7) . ? 
W1 S3 2.4553(7) . ? 
W1 S2 2.4624(7) . ? 
W1 S4 2.4649(7) . ? 
W1 P1 2.5202(8) . ? 
W1 W2 2.67417(19) . ? 
W1 W3 2.67604(17) 7_566 ? 
W1 W3 2.67655(17) . ? 
W1 W2 2.67701(18) 7_566 ? 
W2 S4 2.4527(7) 7_566 ? 
W2 S1 2.4543(7) . ? 
W2 S3 2.4614(7) 7_566 ? 
W2 S2 2.4626(7) . ? 
W2 P2 2.5172(8) . ? 
W2 W3 2.67374(19) . ? 
W2 W1 2.67702(18) 7_566 ? 
W2 W3 2.67884(18) 7_566 ? 
W3 S1 2.4530(7) . ? 
W3 S4 2.4535(8) . ? 
W3 S2 2.4590(7) 7_566 ? 
W3 S3 2.4607(8) 7_566 ? 
W3 P3 2.5179(8) . ? 
W3 W1 2.67599(18) 7_566 ? 
W3 W2 2.67882(18) 7_566 ? 
S2 W3 2.4591(7) 7_566 ? 
S3 W3 2.4607(8) 7_566 ? 
S3 W2 2.4614(7) 7_566 ? 
S4 W2 2.4528(7) 7_566 ? 
P1 C11' 1.822(15) . ? 
P1 C109 1.826(3) . ? 
P1 C105 1.833(3) . ? 
P1 C101 1.847(10) . ? 
P2 C21' 1.83(4) . ? 
P2 C205 1.829(3) . ? 
P2 C209 1.836(3) . ? 
P2 C201 1.842(13) . ? 
P3 C35' 1.709(12) . ? 
P3 C301 1.749(11) . ? 
P3 C309 1.834(3) . ? 
P3 C305 1.943(9) . ? 
P3 C31' 1.994(15) . ? 
C101 C102 1.511(10) . ? 
C102 C103 1.535(10) . ? 
C103 C104 1.450(14) . ? 
C11' C12' 1.511(14) . ? 
C12' C13' 1.668(13) . ? 
C13' C14' 1.5039 . ? 
C105 C106 1.520(4) . ? 
C106 C107 1.508(5) . ? 
C107 C108 1.508(5) . ? 
C109 C110 1.516(5) . ? 
C110 C111 1.523(5) . ? 
C111 C112 1.496(6) . ? 
C201 C202 1.516(9) . ? 
C202 C203 1.504(8) . ? 
C203 C204 1.486(13) . ? 
C21' C22' 1.53(3) . ? 
C22' C23' 1.53(3) . ? 
C23' C24' 1.41(3) . ? 
C205 C206 1.527(5) . ? 
C206 C27' 1.521(16) . ? 
C206 C207 1.561(11) . ? 
C207 C208 1.557(19) . ? 
C27' C28' 1.38(3) . ? 
C209 C210 1.524(5) . ? 
C210 C211 1.502(5) . ? 
C211 C212 1.507(6) . ? 
C301 C302 1.542(11) . ? 
C302 C303 1.494(12) . ? 
C303 C304 1.500(12) . ? 
C31' C32' 1.554(15) . ? 
C32' C33' 1.57(2) . ? 
C33' C34' 1.522(15) . ? 
C305 C306 1.544(9) . ? 
C306 C307 1.505(10) . ? 
C307 C308 1.501(12) . ? 
C35' C36' 1.540(12) . ? 
C36' C37' 1.520(13) . ? 
C37' C38' 1.520(15) . ? 
C309 C310 1.532(4) . ? 
C310 C311 1.526(5) . ? 
C311 C312 1.503(5) . ? 
  
loop_ 
 _geom_angle_atom_site_label_1 
 _geom_angle_atom_site_label_2 
 _geom_angle_atom_site_label_3 
 _geom_angle 
 _geom_angle_site_symmetry_1 
 _geom_angle_site_symmetry_3 
 _geom_angle_publ_flag 
S1 W1 S3 172.80(2) . . ? 
S1 W1 S2 89.93(2) . . ? 
S3 W1 S2 89.69(3) . . ? 
S1 W1 S4 89.72(3) . . ? 
S3 W1 S4 89.70(3) . . ? 
S2 W1 S4 172.36(2) . . ? 
S1 W1 P1 92.37(3) . . ? 
S3 W1 P1 94.83(3) . . ? 
S2 W1 P1 92.78(2) . . ? 
S4 W1 P1 94.86(3) . . ? 
S1 W1 W2 57.010(18) . . ? 
S3 W1 W2 117.167(19) . . ? 
S2 W1 W2 57.117(17) . . ? 
S4 W1 W2 116.733(18) . . ? 
P1 W1 W2 133.43(2) . . ? 
S1 W1 W3 117.054(18) . 7_566 ? 
S3 W1 W3 57.117(18) . 7_566 ? 
S2 W1 W3 57.000(16) . 7_566 ? 
S4 W1 W3 116.681(17) . 7_566 ? 
P1 W1 W3 135.265(19) . 7_566 ? 
W2 W1 W3 60.092(4) . 7_566 ? 
S1 W1 W3 56.944(17) . . ? 
S3 W1 W3 117.131(17) . . ? 
S2 W1 W3 117.027(17) . . ? 
S4 W1 W3 56.827(18) . . ? 
P1 W1 W3 134.665(19) . . ? 
W2 W1 W3 59.960(4) . . ? 
W3 W1 W3 90.029(6) 7_566 . ? 
S1 W1 W2 116.950(17) . 7_566 ? 
S3 W1 W2 57.121(17) . 7_566 ? 
S2 W1 W2 116.887(17) . 7_566 ? 
S4 W1 W2 56.801(17) . 7_566 ? 
P1 W1 W2 136.57(2) . 7_566 ? 
W2 W1 W2 89.999(5) . 7_566 ? 
W3 W1 W2 59.930(5) 7_566 7_566 ? 
W3 W1 W2 60.050(4) . 7_566 ? 
S4 W2 S1 172.62(3) 7_566 . ? 
S4 W2 S3 89.84(2) 7_566 7_566 ? 
S1 W2 S3 90.00(2) . 7_566 ? 
S4 W2 S2 89.34(2) 7_566 . ? 
S1 W2 S2 89.88(2) . . ? 
S3 W2 S2 172.64(3) 7_566 . ? 
S4 W2 P2 94.30(3) 7_566 . ? 
S1 W2 P2 93.08(3) . . ? 
S3 W2 P2 91.99(3) 7_566 . ? 
S2 W2 P2 95.37(3) . . ? 
S4 W2 W3 117.201(18) 7_566 . ? 
S1 W2 W3 56.962(17) . . ? 
S3 W2 W3 57.086(19) 7_566 . ? 
S2 W2 W3 117.125(18) . . ? 
P2 W2 W3 133.254(19) . . ? 
S4 W2 W1 116.874(19) 7_566 . ? 
S1 W2 W1 56.936(18) . . ? 
S3 W2 W1 117.095(19) 7_566 . ? 
S2 W2 W1 57.110(18) . . ? 
P2 W2 W1 135.682(19) . . ? 
W3 W2 W1 60.064(4) . . ? 
S4 W2 W1 57.237(18) 7_566 7_566 ? 
S1 W2 W1 116.925(18) . 7_566 ? 
S3 W2 W1 56.903(18) 7_566 7_566 ? 
S2 W2 W1 116.886(17) . 7_566 ? 
P2 W2 W1 134.270(19) . 7_566 ? 
W3 W2 W1 60.015(4) . 7_566 ? 
W1 W2 W1 89.999(5) . 7_566 ? 
S4 W2 W3 56.919(18) 7_566 7_566 ? 
S1 W2 W3 116.876(18) . 7_566 ? 
S3 W2 W3 116.829(18) 7_566 7_566 ? 
S2 W2 W3 56.960(17) . 7_566 ? 
P2 W2 W3 136.707(19) . 7_566 ? 
W3 W2 W3 90.029(6) . 7_566 ? 
W1 W2 W3 59.988(5) . 7_566 ? 
W1 W2 W3 59.966(4) 7_566 7_566 ? 
S1 W3 S4 89.97(3) . . ? 
S1 W3 S2 172.70(2) . 7_566 ? 
S4 W3 S2 89.40(2) . 7_566 ? 
S1 W3 S3 90.04(3) . 7_566 ? 
S4 W3 S3 172.61(2) . 7_566 ? 
S2 W3 S3 89.65(3) 7_566 7_566 ? 
S1 W3 P3 91.27(3) . . ? 
S4 W3 P3 92.06(3) . . ? 
S2 W3 P3 96.03(3) 7_566 . ? 
S3 W3 P3 95.33(3) 7_566 . ? 
S1 W3 W2 57.008(17) . . ? 
S4 W3 W2 117.156(17) . . ? 
S2 W3 W2 117.132(17) 7_566 . ? 
S3 W3 W2 57.109(17) 7_566 . ? 
P3 W3 W2 134.31(2) . . ? 
S1 W3 W1 117.009(18) . 7_566 ? 
S4 W3 W1 116.778(17) . 7_566 ? 
S2 W3 W1 57.122(17) 7_566 7_566 ? 
S3 W3 W1 56.924(17) 7_566 7_566 ? 
P3 W3 W1 137.89(2) . 7_566 ? 
W2 W3 W1 60.053(5) . 7_566 ? 
S1 W3 W1 56.916(18) . . ? 
S4 W3 W1 57.235(17) . . ? 
S2 W3 W1 117.029(17) 7_566 . ? 
S3 W3 W1 117.030(17) 7_566 . ? 
P3 W3 W1 132.13(2) . . ? 
W2 W3 W1 59.976(5) . . ? 
W1 W3 W1 89.970(6) 7_566 . ? 
S1 W3 W2 116.855(18) . 7_566 ? 
S4 W3 W2 56.894(17) . 7_566 ? 
S2 W3 W2 57.085(17) 7_566 7_566 ? 
S3 W3 W2 116.800(18) 7_566 7_566 ? 
P3 W3 W2 135.58(2) . 7_566 ? 
W2 W3 W2 89.970(5) . 7_566 ? 
W1 W3 W2 59.918(4) 7_566 7_566 ? 
W1 W3 W2 59.983(4) . 7_566 ? 
W1 S1 W3 66.140(18) . . ? 
W1 S1 W2 66.054(17) . . ? 
W3 S1 W2 66.030(18) . . ? 
W3 S2 W1 65.878(18) 7_566 . ? 
W3 S2 W2 65.953(17) 7_566 . ? 
W1 S2 W2 65.773(18) . . ? 
W1 S3 W3 65.960(19) . 7_566 ? 
W1 S3 W2 65.977(18) . 7_566 ? 
W3 S3 W2 65.803(18) 7_566 7_566 ? 
W2 S4 W3 66.186(18) 7_566 . ? 
W2 S4 W1 65.962(18) 7_566 . ? 
W3 S4 W1 65.938(19) . . ? 
C11' P1 C109 91.3(4) . . ? 
C11' P1 C105 111.4(4) . . ? 
C109 P1 C105 104.53(15) . . ? 
C11' P1 C101 16.7(3) . . ? 
C109 P1 C101 106.5(3) . . ? 
C105 P1 C101 100.1(3) . . ? 
C11' P1 W1 116.7(4) . . ? 
C109 P1 W1 114.53(11) . . ? 
C105 P1 W1 115.29(10) . . ? 
C101 P1 W1 114.4(3) . . ? 
C21' P2 C205 92.3(7) . . ? 
C21' P2 C209 108.0(11) . . ? 
C205 P2 C209 104.05(16) . . ? 
C21' P2 C201 12.8(7) . . ? 
C205 P2 C201 104.9(2) . . ? 
C209 P2 C201 102.6(4) . . ? 
C21' P2 W2 120.2(11) . . ? 
C205 P2 W2 115.09(12) . . ? 
C209 P2 W2 114.26(11) . . ? 
C201 P2 W2 114.5(4) . . ? 
C35' P3 C301 84.5(6) . . ? 
C35' P3 C309 106.1(5) . . ? 
C301 P3 C309 106.6(4) . . ? 
C35' P3 C305 16.7(3) . . ? 
C301 P3 C305 101.0(6) . . ? 
C309 P3 C305 103.0(3) . . ? 
C35' P3 C31' 97.9(6) . . ? 
C301 P3 C31' 13.5(5) . . ? 
C309 P3 C31' 101.1(5) . . ? 
C305 P3 C31' 114.5(5) . . ? 
C35' P3 W3 122.6(4) . . ? 
C301 P3 W3 117.8(4) . . ? 
C309 P3 W3 114.74(10) . . ? 
C305 P3 W3 111.8(2) . . ? 
C31' P3 W3 111.1(4) . . ? 
C102 C101 P1 116.4(6) . . ? 
C101 C102 C103 113.8(7) . . ? 
C104 C103 C102 112.2(7) . . ? 
C12' C11' P1 113.8(8) . . ? 
C11' C12' C13' 107.0(9) . . ? 
C14' C13' C12' 104.3(6) . . ? 
C106 C105 P1 117.3(2) . . ? 
C107 C106 C105 113.8(3) . . ? 
C108 C107 C106 113.5(4) . . ? 
C110 C109 P1 115.7(2) . . ? 
C109 C110 C111 111.8(3) . . ? 
C112 C111 C110 113.1(4) . . ? 
C202 C201 P2 115.0(6) . . ? 
C203 C202 C201 115.6(6) . . ? 
C204 C203 C202 114.3(7) . . ? 
C22' C21' P2 112.5(16) . . ? 
C23' C22' C21' 113.7(19) . . ? 
C24' C23' C22' 116.6(18) . . ? 
C206 C205 P2 115.0(2) . . ? 
C27' C206 C205 112.5(7) . . ? 
C27' C206 C207 29.0(9) . . ? 
C205 C206 C207 114.5(6) . . ? 
C208 C207 C206 108.7(10) . . ? 
C28' C27' C206 122(2) . . ? 
C210 C209 P2 117.5(2) . . ? 
C211 C210 C209 113.9(3) . . ? 
C210 C211 C212 112.9(4) . . ? 
C302 C301 P3 111.0(7) . . ? 
C303 C302 C301 114.0(8) . . ? 
C302 C303 C304 113.5(8) . . ? 
C32' C31' P3 116.4(10) . . ? 
C31' C32' C33' 109.6(11) . . ? 
C34' C33' C32' 111.7(12) . . ? 
C306 C305 P3 115.0(5) . . ? 
C307 C306 C305 113.8(7) . . ? 
C308 C307 C306 113.7(7) . . ? 
C36' C35' P3 110.9(7) . . ? 
C37' C36' C35' 112.7(9) . . ? 
C38' C37' C36' 112.7(9) . . ? 
C310 C309 P3 116.5(2) . . ? 
C311 C310 C309 113.6(3) . . ? 
C312 C311 C310 113.7(3) . . ? 
  
_diffrn_measured_fraction_theta_max    0.927 
_diffrn_reflns_theta_full              33.22 
_diffrn_measured_fraction_theta_full   0.927 
_refine_diff_density_max    0.983 
_refine_diff_density_min   -1.718 
_refine_diff_density_rms    0.396 
  
#===END 
  
data_final 
  
_audit_creation_method            SHELXL-97 
_chemical_name_systematic 
; 
octakis(mu!3$-sulfido)-hexakis(triphenylphophine) 
-hexa-tungsten-(benzene)solvate 
; 
_chemical_name_common             'Tungsten sulfide cluster with' 
_chemical_melting_point           'not measured'  
_chemical_formula_moiety          W6S8(PC18H15)6(C6H6) 
_chemical_formula_sum 
 'C114 H96 P6 S8 W6' 
_chemical_formula_weight          3011.31 
  
loop_ 
 _atom_type_symbol 
 _atom_type_description 
 _atom_type_scat_dispersion_real 
 _atom_type_scat_dispersion_imag 
 _atom_type_scat_source 
 'C'  'C'   0.0033   0.0016 
 'International Tables Vol C Tables 4.2.6.8 and 6.1.1.4' 
 'H'  'H'   0.0000   0.0000 
 'International Tables Vol C Tables 4.2.6.8 and 6.1.1.4' 
 'P'  'P'   0.1023   0.0942 
 'International Tables Vol C Tables 4.2.6.8 and 6.1.1.4' 
 'S'  'S'   0.1246   0.1234 
 'International Tables Vol C Tables 4.2.6.8 and 6.1.1.4' 
 'W'  'W'  -0.8490   6.8722 
 'International Tables Vol C Tables 4.2.6.8 and 6.1.1.4' 
  
_symmetry_cell_setting            triclinic 
_symmetry_space_group_name_H-M    P-1 
  
loop_ 
 _symmetry_equiv_pos_as_xyz 
 'x, y, z' 
 '-x, -y, -z' 
  
_cell_length_a                    14.6107(6) 
_cell_length_b                    16.6282(7) 
_cell_length_c                    21.2344(9) 
_cell_angle_alpha                 96.3869(9) 
_cell_angle_beta                  93.7166(10) 
_cell_angle_gamma                 92.1225(10) 
_cell_volume                      5111.0(4) 
_cell_formula_units_Z             2 
_cell_measurement_temperature     446(2) 
_cell_measurement_reflns_used     ? 
_cell_measurement_theta_min       ? 
_cell_measurement_theta_max       ? 
  
_exptl_crystal_description        block 
_exptl_crystal_colour             dark-red 
_exptl_crystal_size_max           0.2 
_exptl_crystal_size_mid           0.2 
_exptl_crystal_size_min           0.1 
_exptl_crystal_density_meas       'NOT MEASURED' 
_exptl_crystal_density_diffrn     1.957 
_exptl_crystal_density_method     'not measured' 
_exptl_crystal_F_000              2884 
_exptl_absorpt_coefficient_mu     7.031 
_exptl_absorpt_correction_type    empirical 
_exptl_absorpt_correction_T_min   0.246069 
_exptl_absorpt_correction_T_max   1 
_exptl_absorpt_process_details    ? 
  
_exptl_special_details 
; 
Absorption correction was done with SADABS beta Version.
This program only gives ratios of max and min absorptions.
; 
  
_diffrn_ambient_temperature       446(2) 
_diffrn_radiation_wavelength      0.71073 
_diffrn_radiation_type            MoK\a 
_diffrn_radiation_source          'fine-focus sealed tube' 
_diffrn_radiation_monochromator   graphite 
_diffrn_measurement_device_type   ? 
_diffrn_measurement_method        '\w scans' 
_diffrn_detector_area_resol_mean  ? 
_diffrn_standards_number          ? 
_diffrn_standards_interval_count  ? 
_diffrn_standards_interval_time   ? 
_diffrn_standards_decay_%         0 
_diffrn_reflns_number             39842 
_diffrn_reflns_av_R_equivalents   0.0374 
_diffrn_reflns_av_sigmaI/netI     0.0640 
_diffrn_reflns_limit_h_min        -16 
_diffrn_reflns_limit_h_max        18 
_diffrn_reflns_limit_k_min        -20 
_diffrn_reflns_limit_k_max        21 
_diffrn_reflns_limit_l_min        -27 
_diffrn_reflns_limit_l_max        27 
_diffrn_reflns_theta_min          1.40 
_diffrn_reflns_theta_max          27.10 
_reflns_number_total              21993 
_reflns_number_gt                 14342 
_reflns_threshold_expression      >2sigma(I) 
  
_computing_data_collection        'BRUKER SMART' 
_computing_cell_refinement        'Bruker SAINT Plus' 
_computing_data_reduction         SHELXTL 
_computing_structure_solution     'SHELXS-97 (Sheldrick, 1990)' 
_computing_structure_refinement   'SHELXL-97 (Sheldrick, 1997)' 
_computing_molecular_graphics     SHELXTL 
_computing_publication_material   SHELXTL 
  
_refine_special_details 
; 
 Refinement of F^2^ against ALL reflections.  The weighted R-factor wR and 
 goodness of fit S are based on F^2^, conventional R-factors R are based 
 on F, with F set to zero for negative F^2^. The threshold expression of 
 F^2^ > 2sigma(F^2^) is used only for calculating R-factors(gt) etc. and is 
 not relevant to the choice of reflections for refinement.  R-factors based 
 on F^2^ are statistically about twice as large as those based on F, and R- 
 factors based on ALL data will be even larger. 
; 
  
_refine_ls_structure_factor_coef  Fsqd 
_refine_ls_matrix_type            full 
_refine_ls_weighting_scheme       calc 
_refine_ls_weighting_details 
 'calc w=1/[\s^2^(Fo^2^)+(0.0369P)^2^+0.0000P] where P=(Fo^2^+2Fc^2^)/3' 
_atom_sites_solution_primary      direct 
_atom_sites_solution_secondary    difmap 
_atom_sites_solution_hydrogens    geom 
_refine_ls_hydrogen_treatment     mixed 
_refine_ls_extinction_method      none 
_refine_ls_extinction_coef        ? 
_refine_ls_number_reflns          21993 
_refine_ls_number_parameters      1122 
_refine_ls_number_restraints      36 
_refine_ls_R_factor_all           0.0723 
_refine_ls_R_factor_gt            0.0368 
_refine_ls_wR_factor_ref          0.0881 
_refine_ls_wR_factor_gt           0.0767 
_refine_ls_goodness_of_fit_ref    0.957 
_refine_ls_restrained_S_all       0.965 
_refine_ls_shift/su_max           0.002 
_refine_ls_shift/su_mean          0.000 
  
loop_ 
 _atom_site_label 
 _atom_site_type_symbol 
 _atom_site_fract_x 
 _atom_site_fract_y 
 _atom_site_fract_z 
 _atom_site_U_iso_or_equiv 
 _atom_site_adp_type 
 _atom_site_occupancy 
 _atom_site_symmetry_multiplicity 
 _atom_site_calc_flag 
 _atom_site_refinement_flags 
 _atom_site_disorder_assembly 
 _atom_site_disorder_group 
W1 W 1.207180(19) 0.134264(16) 0.235630(12) 0.01473(7) Uani 1 1 d . . . 
W2 W 1.137859(19) 0.278979(17) 0.222396(13) 0.01587(7) Uani 1 1 d . . . 
W3 W 1.297096(19) 0.241117(17) 0.173198(13) 0.01492(7) Uani 1 1 d . . . 
W4 W 1.364660(19) 0.208695(17) 0.287555(12) 0.01513(7) Uani 1 1 d . . . 
W5 W 1.205463(19) 0.247094(17) 0.336632(13) 0.01579(7) Uani 1 1 d . . . 
W6 W 1.29539(2) 0.353617(17) 0.274001(13) 0.01641(7) Uani 1 1 d . . . 
S7 S 1.06549(12) 0.17784(11) 0.28183(8) 0.0207(4) Uani 1 1 d . . . 
S8 S 1.35314(13) 0.31549(11) 0.37662(8) 0.0207(4) Uani 1 1 d . . . 
S9 S 1.15005(12) 0.17230(11) 0.13304(8) 0.0186(4) Uani 1 1 d . . . 
S10 S 1.43692(12) 0.30998(11) 0.22855(8) 0.0214(4) Uani 1 1 d . . . 
S11 S 1.14517(13) 0.37850(11) 0.31649(9) 0.0223(4) Uani 1 1 d . . . 
S12 S 1.35807(12) 0.11076(10) 0.19325(8) 0.0184(4) Uani 1 1 d . . . 
S13 S 1.27221(13) 0.11612(11) 0.34220(8) 0.0211(4) Uani 1 1 d . . . 
S14 S 1.22983(13) 0.37169(11) 0.16821(8) 0.0211(4) Uani 1 1 d . . . 
P1 P 1.13748(13) -0.01192(11) 0.20759(9) 0.0199(4) Uani 1 1 d . . . 
P2 P 0.99369(13) 0.34899(12) 0.18684(9) 0.0218(4) Uani 1 1 d . . . 
P3 P 1.34553(13) 0.25070(11) 0.06013(8) 0.0193(4) Uani 1 1 d . . . 
P4 P 1.50839(13) 0.13593(11) 0.32052(8) 0.0191(4) Uani 1 1 d . . . 
P5 P 1.15342(13) 0.23956(12) 0.44904(8) 0.0206(4) Uani 1 1 d . A . 
P6 P 1.36043(14) 0.50109(11) 0.29664(9) 0.0218(4) Uani 1 1 d . . . 
C101 C 1.0385(5) -0.0229(4) 0.1492(3) 0.0242(17) Uani 1 1 d . . . 
C102 C 0.9613(6) 0.0202(5) 0.1607(4) 0.045(2) Uani 1 1 d . . . 
H10A H 0.9614 0.0579 0.1965 0.054 Uiso 1 1 calc R . . 
C103 C 0.8851(7) 0.0079(6) 0.1200(5) 0.056(3) Uani 1 1 d . . . 
H10B H 0.8320 0.0339 0.1304 0.068 Uiso 1 1 calc R . . 
C104 C 0.8844(7) -0.0418(6) 0.0641(5) 0.052(3) Uani 1 1 d . . . 
H10C H 0.8321 -0.0492 0.0363 0.062 Uiso 1 1 calc R . . 
C105 C 0.9601(7) -0.0789(7) 0.0508(5) 0.066(3) Uani 1 1 d . . . 
H10D H 0.9617 -0.1107 0.0120 0.079 Uiso 1 1 calc R . . 
C106 C 1.0375(6) -0.0719(6) 0.0930(4) 0.049(3) Uani 1 1 d . . . 
H10E H 1.0890 -0.1007 0.0829 0.058 Uiso 1 1 calc R . . 
C107 C 1.0948(6) -0.0628(5) 0.2738(4) 0.0289(19) Uani 1 1 d . . . 
C108 C 1.1513(6) -0.0620(5) 0.3282(4) 0.034(2) Uani 1 1 d . . . 
H10F H 1.2091 -0.0360 0.3307 0.040 Uiso 1 1 calc R . . 
C109 C 1.1232(7) -0.0995(5) 0.3792(4) 0.045(3) Uani 1 1 d . . . 
H10G H 1.1621 -0.0977 0.4159 0.054 Uiso 1 1 calc R . . 
C110 C 1.0394(7) -0.1389(6) 0.3764(5) 0.052(3) Uani 1 1 d . . . 
H11A H 1.0207 -0.1637 0.4108 0.062 Uiso 1 1 calc R . . 
C111 C 0.9835(7) -0.1413(6) 0.3226(5) 0.057(3) Uani 1 1 d . . . 
H11B H 0.9266 -0.1689 0.3202 0.068 Uiso 1 1 calc R . . 
C112 C 1.0097(6) -0.1033(5) 0.2710(4) 0.045(2) Uani 1 1 d . . . 
H11C H 0.9702 -0.1052 0.2346 0.054 Uiso 1 1 calc R . . 
C113 C 1.2154(5) -0.0867(4) 0.1741(3) 0.0219(16) Uani 1 1 d . . . 
C114 C 1.2191(6) -0.1642(5) 0.1919(4) 0.036(2) Uani 1 1 d . . . 
H11D H 1.1794 -0.1804 0.2210 0.043 Uiso 1 1 calc R . . 
C115 C 1.2810(7) -0.2181(5) 0.1671(4) 0.045(3) Uani 1 1 d . . . 
H11E H 1.2822 -0.2701 0.1793 0.054 Uiso 1 1 calc R . . 
C116 C 1.3405(6) -0.1948(5) 0.1245(4) 0.039(2) Uani 1 1 d . . . 
H11F H 1.3834 -0.2303 0.1087 0.047 Uiso 1 1 calc R . . 
C117 C 1.3366(6) -0.1191(5) 0.1054(4) 0.040(2) Uani 1 1 d . . . 
H11G H 1.3766 -0.1033 0.0763 0.048 Uiso 1 1 calc R . . 
C118 C 1.2732(6) -0.0661(5) 0.1294(4) 0.0309(19) Uani 1 1 d . . . 
H11H H 1.2697 -0.0154 0.1149 0.037 Uiso 1 1 calc R . . 
C201 C 0.8944(5) 0.3513(4) 0.2365(3) 0.0251(17) Uani 1 1 d D . . 
C202 C 0.8110(5) 0.3766(5) 0.2119(4) 0.038(2) Uani 1 1 d D . . 
H20A H 0.8062 0.3933 0.1715 0.045 Uiso 1 1 calc R . . 
C203 C 0.7345(6) 0.3767(6) 0.2481(4) 0.047(3) Uani 1 1 d D . . 
H20B H 0.6791 0.3948 0.2323 0.056 Uiso 1 1 calc R . . 
C204 C 0.7413(6) 0.3502(5) 0.3069(4) 0.039(2) Uani 1 1 d D . . 
H20C H 0.6895 0.3472 0.3299 0.047 Uiso 1 1 calc R . . 
C205 C 0.8246(6) 0.3280(5) 0.3322(4) 0.040(2) Uani 1 1 d D . . 
H20D H 0.8296 0.3130 0.3731 0.048 Uiso 1 1 calc R . . 
C206 C 0.9015(5) 0.3282(5) 0.2963(3) 0.0293(18) Uani 1 1 d D . . 
H20E H 0.9576 0.3125 0.3131 0.035 Uiso 1 1 calc R . . 
C207 C 1.0173(6) 0.4566(5) 0.1817(4) 0.042(2) Uani 1 1 d D . . 
C208 C 1.0621(6) 0.4799(6) 0.1292(5) 0.060(3) Uani 1 1 d D . . 
H20F H 1.0775 0.4415 0.0968 0.072 Uiso 1 1 calc R . . 
C209 C 1.0824(7) 0.5612(7) 0.1274(7) 0.099(6) Uani 1 1 d D . . 
H20G H 1.1090 0.5768 0.0918 0.119 Uiso 1 1 calc R . . 
C210 C 1.0658(8) 0.6194(7) 0.1742(8) 0.112(7) Uani 1 1 d D . . 
H21A H 1.0832 0.6734 0.1721 0.134 Uiso 1 1 calc R . . 
C211 C 1.0224(8) 0.5963(6) 0.2251(7) 0.093(5) Uani 1 1 d D . . 
H21B H 1.0069 0.6352 0.2572 0.112 Uiso 1 1 calc R . . 
C212 C 1.0016(7) 0.5150(5) 0.2287(5) 0.052(3) Uani 1 1 d D . . 
H21C H 0.9760 0.5001 0.2649 0.062 Uiso 1 1 calc R . . 
C213 C 0.9385(5) 0.3094(5) 0.1088(3) 0.0279(18) Uani 1 1 d . . . 
C214 C 0.9303(5) 0.2248(6) 0.0949(4) 0.034(2) Uani 1 1 d . . . 
H21D H 0.9559 0.1922 0.1236 0.041 Uiso 1 1 calc R . . 
C215 C 0.8852(6) 0.1897(7) 0.0397(4) 0.050(3) Uani 1 1 d . . . 
H21E H 0.8795 0.1336 0.0316 0.060 Uiso 1 1 calc R . . 
C216 C 0.8487(7) 0.2359(8) -0.0034(4) 0.062(3) Uani 1 1 d . . . 
H21F H 0.8189 0.2112 -0.0410 0.075 Uiso 1 1 calc R . . 
C217 C 0.8554(6) 0.3177(8) 0.0079(5) 0.058(3) Uani 1 1 d . . . 
H21G H 0.8298 0.3488 -0.0219 0.070 Uiso 1 1 calc R . . 
C218 C 0.9014(5) 0.3566(6) 0.0652(4) 0.042(2) Uani 1 1 d . . . 
H21H H 0.9062 0.4128 0.0730 0.051 Uiso 1 1 calc R . . 
C301 C 1.2699(5) 0.3139(4) 0.0162(3) 0.0246(17) Uani 1 1 d . . . 
C302 C 1.2989(7) 0.3843(5) -0.0057(5) 0.057(3) Uani 1 1 d . . . 
H30A H 1.3603 0.4019 0.0001 0.069 Uiso 1 1 calc R . . 
C303 C 1.2337(8) 0.4299(6) -0.0373(6) 0.080(4) Uani 1 1 d . . . 
H30B H 1.2527 0.4778 -0.0524 0.096 Uiso 1 1 calc R . . 
C304 C 1.1445(7) 0.4043(6) -0.0457(5) 0.065(3) Uani 1 1 d . . . 
H30C H 1.1020 0.4355 -0.0653 0.078 Uiso 1 1 calc R . . 
C305 C 1.1170(6) 0.3339(6) -0.0258(4) 0.048(3) Uani 1 1 d . . . 
H30D H 1.0560 0.3155 -0.0336 0.057 Uiso 1 1 calc R . . 
C306 C 1.1780(6) 0.2885(5) 0.0060(4) 0.037(2) Uani 1 1 d . . . 
H30E H 1.1575 0.2408 0.0206 0.044 Uiso 1 1 calc R . . 
C307 C 1.3503(5) 0.1605(5) 0.0034(3) 0.0243(17) Uani 1 1 d . . . 
C308 C 1.3717(7) 0.0868(5) 0.0234(4) 0.049(3) Uani 1 1 d . . . 
H30F H 1.3795 0.0811 0.0665 0.059 Uiso 1 1 calc R . . 
C309 C 1.3813(9) 0.0219(6) -0.0218(5) 0.071(4) Uani 1 1 d . . . 
H30G H 1.3944 -0.0277 -0.0078 0.085 Uiso 1 1 calc R . . 
C310 C 1.3729(7) 0.0258(6) -0.0849(4) 0.050(3) Uani 1 1 d . . . 
H31A H 1.3807 -0.0197 -0.1134 0.060 Uiso 1 1 calc R . . 
C311 C 1.3526(7) 0.0988(6) -0.1063(4) 0.046(2) Uani 1 1 d . . . 
H31B H 1.3477 0.1036 -0.1496 0.055 Uiso 1 1 calc R . . 
C312 C 1.3396(6) 0.1646(5) -0.0626(4) 0.036(2) Uani 1 1 d . . . 
H31C H 1.3234 0.2132 -0.0772 0.044 Uiso 1 1 calc R . . 
C313 C 1.4599(5) 0.2978(5) 0.0589(3) 0.0238(17) Uani 1 1 d . . . 
C314 C 1.4818(5) 0.3729(5) 0.0905(4) 0.0308(19) Uani 1 1 d . . . 
H31D H 1.4361 0.4013 0.1105 0.037 Uiso 1 1 calc R . . 
C315 C 1.5692(6) 0.4079(5) 0.0938(4) 0.036(2) Uani 1 1 d . . . 
H31E H 1.5814 0.4600 0.1143 0.044 Uiso 1 1 calc R . . 
C316 C 1.6384(6) 0.3652(6) 0.0664(4) 0.041(2) Uani 1 1 d . . . 
H31F H 1.6978 0.3881 0.0690 0.049 Uiso 1 1 calc R . . 
C317 C 1.6195(6) 0.2891(5) 0.0353(4) 0.037(2) Uani 1 1 d . . . 
H31G H 1.6663 0.2602 0.0170 0.045 Uiso 1 1 calc R . . 
C318 C 1.5312(5) 0.2548(5) 0.0308(4) 0.0288(18) Uani 1 1 d . . . 
H31H H 1.5188 0.2034 0.0093 0.035 Uiso 1 1 calc R . . 
C401 C 1.6116(5) 0.1458(4) 0.2764(3) 0.0224(16) Uani 1 1 d . . . 
C402 C 1.6046(6) 0.1713(4) 0.2163(3) 0.0282(18) Uani 1 1 d . . . 
H40A H 1.5477 0.1839 0.1986 0.034 Uiso 1 1 calc R . . 
C403 C 1.6828(6) 0.1782(5) 0.1823(4) 0.037(2) Uani 1 1 d . . . 
H40B H 1.6782 0.1936 0.1414 0.044 Uiso 1 1 calc R . . 
C404 C 1.7670(6) 0.1617(5) 0.2104(4) 0.040(2) Uani 1 1 d . . . 
H40C H 1.8196 0.1688 0.1887 0.048 Uiso 1 1 calc R . . 
C405 C 1.7753(6) 0.1349(5) 0.2696(4) 0.039(2) Uani 1 1 d . . . 
H40D H 1.8321 0.1222 0.2873 0.046 Uiso 1 1 calc R . . 
C406 C 1.6960(6) 0.1274(5) 0.3024(4) 0.035(2) Uani 1 1 d . . . 
H40E H 1.7004 0.1097 0.3425 0.041 Uiso 1 1 calc R . . 
C407 C 1.4880(5) 0.0246(5) 0.3114(3) 0.0247(17) Uani 1 1 d . . . 
C408 C 1.4361(5) -0.0139(5) 0.3518(4) 0.0322(19) Uani 1 1 d . . . 
H40F H 1.4139 0.0160 0.3868 0.039 Uiso 1 1 calc R . . 
C409 C 1.4166(6) -0.0967(5) 0.3411(4) 0.035(2) Uani 1 1 d . . . 
H40G H 1.3814 -0.1214 0.3691 0.042 Uiso 1 1 calc R . . 
C410 C 1.4480(6) -0.1429(6) 0.2899(4) 0.044(2) Uani 1 1 d . . . 
H41A H 1.4346 -0.1984 0.2828 0.053 Uiso 1 1 calc R . . 
C411 C 1.5002(7) -0.1042(5) 0.2493(4) 0.044(2) Uani 1 1 d . . . 
H41B H 1.5224 -0.1345 0.2145 0.053 Uiso 1 1 calc R . . 
C412 C 1.5199(6) -0.0231(5) 0.2588(4) 0.0309(19) Uani 1 1 d . . . 
H41C H 1.5548 0.0012 0.2304 0.037 Uiso 1 1 calc R . . 
C413 C 1.5565(5) 0.1604(5) 0.4018(3) 0.0245(17) Uani 1 1 d . . . 
C414 C 1.5902(6) 0.1029(6) 0.4399(3) 0.036(2) Uani 1 1 d . . . 
H41D H 1.5825 0.0481 0.4251 0.043 Uiso 1 1 calc R . . 
C415 C 1.6348(6) 0.1262(6) 0.4991(4) 0.040(2) Uani 1 1 d . . . 
H41E H 1.6546 0.0874 0.5246 0.048 Uiso 1 1 calc R . . 
C416 C 1.6496(6) 0.2072(6) 0.5197(4) 0.039(2) Uani 1 1 d . . . 
H41F H 1.6805 0.2232 0.5590 0.046 Uiso 1 1 calc R . . 
C417 C 1.6188(6) 0.2650(6) 0.4824(4) 0.041(2) Uani 1 1 d . . . 
H41G H 1.6304 0.3198 0.4961 0.049 Uiso 1 1 calc R . . 
C418 C 1.5706(5) 0.2414(5) 0.4246(4) 0.0314(19) Uani 1 1 d . . . 
H41H H 1.5474 0.2805 0.4006 0.038 Uiso 1 1 calc R . . 
C501 C 1.2261(5) 0.1829(5) 0.4999(3) 0.0269(18) Uani 1 1 d . . . 
C502 C 1.3212(5) 0.1903(5) 0.4994(4) 0.0311(19) Uani 1 1 d . . . 
H50A H 1.3469 0.2203 0.4700 0.037 Uiso 1 1 calc R . . 
C503 C 1.3794(6) 0.1539(6) 0.5417(4) 0.042(2) Uani 1 1 d . . . 
H50B H 1.4428 0.1596 0.5405 0.050 Uiso 1 1 calc R . . 
C504 C 1.3414(6) 0.1097(5) 0.5848(4) 0.041(2) Uani 1 1 d . . . 
H50C H 1.3795 0.0860 0.6136 0.049 Uiso 1 1 calc R . . 
C505 C 1.2480(7) 0.0999(5) 0.5863(5) 0.048(3) Uani 1 1 d . . . 
H50D H 1.2232 0.0697 0.6159 0.057 Uiso 1 1 calc R . . 
C506 C 1.1907(5) 0.1349(5) 0.5436(4) 0.034(2) Uani 1 1 d . . . 
H50E H 1.1275 0.1263 0.5439 0.041 Uiso 1 1 calc R . . 
C507 C 1.0412(5) 0.1872(5) 0.4475(3) 0.0223(17) Uani 1 1 d . . . 
C508 C 0.9628(5) 0.2267(5) 0.4624(4) 0.0316(19) Uani 1 1 d . . . 
H50F H 0.9673 0.2820 0.4756 0.038 Uiso 1 1 calc R . . 
C509 C 0.8765(6) 0.1859(6) 0.4581(4) 0.046(2) Uani 1 1 d . . . 
H50G H 0.8241 0.2136 0.4678 0.055 Uiso 1 1 calc R . . 
C510 C 0.8715(6) 0.1039(5) 0.4392(4) 0.035(2) Uani 1 1 d . . . 
H51A H 0.8153 0.0753 0.4376 0.042 Uiso 1 1 calc R . . 
C511 C 0.9471(6) 0.0644(5) 0.4228(4) 0.043(2) Uani 1 1 d . . . 
H51B H 0.9416 0.0093 0.4086 0.051 Uiso 1 1 calc R . . 
C512 C 1.0348(3) 0.1048(3) 0.4268(2) 0.035(2) Uani 1 1 d . . . 
H51C H 1.0866 0.0770 0.4159 0.042 Uiso 1 1 calc R . . 
C601 C 1.4573(3) 0.5201(3) 0.3557(2) 0.0272(18) Uani 1 1 d R . . 
C602 C 1.5192(3) 0.4625(3) 0.3644(2) 0.038(2) Uani 1 1 d R . . 
H60A H 1.5131 0.4131 0.3388 0.045 Uiso 1 1 calc R . . 
C603 C 1.5918(6) 0.4762(6) 0.4109(4) 0.050(3) Uani 1 1 d . . . 
H60B H 1.6333 0.4358 0.4157 0.061 Uiso 1 1 calc R . . 
C604 C 1.6031(7) 0.5471(7) 0.4491(5) 0.058(3) Uani 1 1 d . . . 
H60C H 1.6503 0.5548 0.4811 0.070 Uiso 1 1 calc R . . 
C605 C 1.5435(8) 0.6075(7) 0.4399(5) 0.073(4) Uani 1 1 d . . . 
H60D H 1.5515 0.6575 0.4645 0.088 Uiso 1 1 calc R . . 
C606 C 1.4715(7) 0.5937(6) 0.3937(5) 0.052(3) Uani 1 1 d . . . 
H60E H 1.4314 0.6349 0.3880 0.062 Uiso 1 1 calc R . . 
C607 C 1.3989(6) 0.5462(4) 0.2274(4) 0.0282(18) Uani 1 1 d . . . 
C608 C 1.3376(6) 0.5505(4) 0.1745(4) 0.0288(18) Uani 1 1 d . . . 
H60F H 1.2767 0.5325 0.1755 0.035 Uiso 1 1 calc R . . 
C609 C 1.3664(7) 0.5813(5) 0.1211(4) 0.039(2) Uani 1 1 d . . . 
H60G H 1.3253 0.5829 0.0859 0.047 Uiso 1 1 calc R . . 
C610 C 1.4572(7) 0.6100(5) 0.1197(4) 0.047(3) Uani 1 1 d . . . 
H61A H 1.4768 0.6306 0.0836 0.056 Uiso 1 1 calc R . . 
C611 C 1.5156(7) 0.6076(6) 0.1701(5) 0.054(3) Uani 1 1 d . . . 
H61B H 1.5758 0.6274 0.1690 0.065 Uiso 1 1 calc R . . 
C612 C 1.4890(6) 0.5762(5) 0.2245(4) 0.040(2) Uani 1 1 d . . . 
H61C H 1.5312 0.5752 0.2591 0.048 Uiso 1 1 calc R . . 
C613 C 1.2795(5) 0.5750(4) 0.3294(3) 0.0260(18) Uani 1 1 d . . . 
C614 C 1.2372(6) 0.5553(5) 0.3825(4) 0.039(2) Uani 1 1 d . . . 
H61D H 1.2501 0.5077 0.3998 0.046 Uiso 1 1 calc R . . 
C615 C 1.1744(7) 0.6086(6) 0.4097(5) 0.057(3) Uani 1 1 d . . . 
H61E H 1.1442 0.5950 0.4446 0.069 Uiso 1 1 calc R . . 
C616 C 1.1569(7) 0.6797(6) 0.3859(5) 0.053(3) Uani 1 1 d . . . 
H61F H 1.1165 0.7155 0.4048 0.063 Uiso 1 1 calc R . . 
C617 C 1.2006(7) 0.6973(6) 0.3334(4) 0.051(3) Uani 1 1 d . . . 
H61G H 1.1886 0.7456 0.3168 0.061 Uiso 1 1 calc R . . 
C618 C 1.2631(4) 0.6450(4) 0.3037(2) 0.039(2) Uani 1 1 d . . . 
H61H H 1.2918 0.6579 0.2681 0.047 Uiso 1 1 calc R . . 
C1S C 1.3085(4) 0.2828(4) 0.7029(2) 0.116(5) Uiso 1 1 d R . . 
H1SA H 1.3447 0.2731 0.6686 0.139 Uiso 1 1 calc R . . 
C2S C 1.2827(4) 0.2195(4) 0.7365(2) 0.118(5) Uiso 1 1 d R . . 
H2SA H 1.3015 0.1675 0.7247 0.142 Uiso 1 1 calc R . . 
C3S C 1.2287(4) 0.2340(4) 0.7878(2) 0.131(6) Uiso 1 1 d R . . 
H3SA H 1.2114 0.1917 0.8103 0.157 Uiso 1 1 calc R . . 
C4S C 1.2006(4) 0.3118(4) 0.8054(2) 0.135(6) Uiso 1 1 d R . . 
H4SA H 1.1645 0.3215 0.8397 0.162 Uiso 1 1 calc R . . 
C5S C 1.2264(4) 0.3750(4) 0.7717(2) 0.144(7) Uiso 1 1 d R . . 
H5SA H 1.2076 0.4271 0.7835 0.172 Uiso 1 1 calc R . . 
C6S C 1.2804(4) 0.3605(4) 0.7205(2) 0.121(6) Uiso 1 1 d R . . 
H6SA H 1.2977 0.4029 0.6980 0.146 Uiso 1 1 calc R . . 
C513 C 1.1372(5) 0.3324(5) 0.5028(3) 0.0295(18) Uiso 1 1 d D . . 
C514 C 1.1361(5) 0.3279(4) 0.5648(3) 0.070(4) Uiso 0.746(11) 1 d PD A 1 
H51D H 1.1428 0.2781 0.5803 0.084 Uiso 0.746(11) 1 calc PR A 1 
C515 C 1.1249(5) 0.3965(4) 0.6068(3) 0.087(6) Uiso 0.746(11) 1 d PRD A 1 
H51E H 1.1290 0.3934 0.6504 0.104 Uiso 0.746(11) 1 calc PR A 1 
C524 C 1.0942(5) 0.3140(4) 0.5618(3) 0.032(8) Uiso 0.254(11) 1 d PRD A 2 
H52A H 1.0732 0.2635 0.5711 0.039 Uiso 0.254(11) 1 calc PR A 2 
C525 C 1.0914(5) 0.3943(4) 0.6034(3) 0.021(7) Uiso 0.254(11) 1 d PRD A 2 
H52C H 1.0776 0.3925 0.6453 0.025 Uiso 0.254(11) 1 calc PR A 2 
C516 C 1.1076(5) 0.4699(4) 0.5837(3) 0.100(5) Uiso 1 1 d RD . . 
H51F H 1.1002 0.5159 0.6118 0.120 Uiso 1 1 calc R A 1 
C517 C 1.1015(5) 0.4746(4) 0.5187(3) 0.208(14) Uiso 0.746(11) 1 d PRD A 1 
H51G H 1.0900 0.5237 0.5032 0.250 Uiso 0.746(11) 1 calc PR A 1 
C518 C 1.1127(5) 0.4059(4) 0.4767(3) 0.108(7) Uiso 0.746(11) 1 d PRD A 1 
H51H H 1.1046 0.4072 0.4330 0.130 Uiso 0.746(11) 1 calc PR A 1 
C527 C 1.1692(14) 0.4731(11) 0.5364(8) 0.010(5) Uiso 0.254(11) 1 d PD A 2 
H52D H 1.2051 0.5197 0.5335 0.012 Uiso 0.254(11) 1 calc PR A 2 
C528 C 1.1748(13) 0.4030(8) 0.4932(8) 0.001(5) Uiso 0.254(11) 1 d PD A 2 
H52E H 1.2059 0.4067 0.4567 0.001 Uiso 0.254(11) 1 calc PR A 2 
  
loop_ 
 _atom_site_aniso_label 
 _atom_site_aniso_U_11 
 _atom_site_aniso_U_22 
 _atom_site_aniso_U_33 
 _atom_site_aniso_U_23 
 _atom_site_aniso_U_13 
 _atom_site_aniso_U_12 
W1 0.01276(16) 0.01434(14) 0.01629(13) -0.00278(12) 0.00187(11) 0.00220(11) 
W2 0.01109(16) 0.01577(14) 0.02002(14) -0.00184(12) 0.00081(11) 0.00305(11) 
W3 0.01142(16) 0.01525(14) 0.01750(13) -0.00195(12) 0.00209(11) 0.00243(11) 
W4 0.01068(16) 0.01748(15) 0.01641(13) -0.00297(12) 0.00176(11) 0.00308(11) 
W5 0.01122(16) 0.01789(15) 0.01733(13) -0.00376(12) 0.00264(11) 0.00267(11) 
W6 0.01257(16) 0.01500(14) 0.02049(14) -0.00378(12) 0.00133(11) 0.00204(11) 
S7 0.0129(10) 0.0235(10) 0.0250(9) -0.0002(8) 0.0025(7) -0.0013(7) 
S8 0.0163(10) 0.0246(10) 0.0190(8) -0.0049(8) -0.0023(7) -0.0016(8) 
S9 0.0157(10) 0.0194(9) 0.0194(8) -0.0019(8) -0.0024(7) 0.0001(7) 
S10 0.0134(10) 0.0244(10) 0.0253(9) -0.0030(8) 0.0044(7) -0.0001(7) 
S11 0.0169(11) 0.0197(9) 0.0292(9) -0.0037(8) 0.0017(8) 0.0070(7) 
S12 0.0179(10) 0.0181(9) 0.0184(8) -0.0038(8) 0.0027(7) 0.0060(7) 
S13 0.0210(11) 0.0228(10) 0.0194(8) 0.0022(8) 0.0021(7) 0.0010(8) 
S14 0.0214(11) 0.0169(9) 0.0250(9) 0.0017(8) 0.0019(7) 0.0025(7) 
P1 0.0199(11) 0.0168(9) 0.0226(9) -0.0022(8) 0.0061(8) -0.0004(8) 
P2 0.0151(11) 0.0233(10) 0.0280(10) 0.0045(9) 0.0025(8) 0.0054(8) 
P3 0.0166(11) 0.0209(10) 0.0202(9) -0.0013(8) 0.0053(7) 0.0034(8) 
P4 0.0138(11) 0.0251(10) 0.0178(9) -0.0012(8) 0.0013(7) 0.0031(8) 
P5 0.0147(11) 0.0264(10) 0.0198(9) -0.0039(9) 0.0041(7) 0.0016(8) 
P6 0.0208(11) 0.0157(9) 0.0281(10) -0.0042(9) 0.0051(8) 0.0017(8) 
C101 0.022(5) 0.019(4) 0.030(4) -0.004(3) 0.005(3) -0.001(3) 
C102 0.030(6) 0.041(5) 0.057(6) -0.026(5) -0.007(4) 0.011(4) 
C103 0.028(6) 0.049(6) 0.082(7) -0.029(6) -0.013(5) 0.014(5) 
C104 0.028(6) 0.067(7) 0.056(6) -0.013(6) -0.007(5) 0.007(5) 
C105 0.044(8) 0.092(9) 0.050(6) -0.040(6) -0.007(5) 0.008(6) 
C106 0.023(5) 0.072(7) 0.044(5) -0.030(5) 0.006(4) 0.015(5) 
C107 0.033(5) 0.022(4) 0.032(4) -0.003(4) 0.015(4) 0.007(3) 
C108 0.047(6) 0.023(4) 0.030(4) 0.001(4) 0.007(4) 0.006(4) 
C109 0.072(8) 0.030(5) 0.036(5) 0.008(4) 0.013(5) 0.013(5) 
C110 0.052(7) 0.058(7) 0.056(6) 0.027(6) 0.034(5) 0.031(5) 
C111 0.036(6) 0.065(7) 0.076(7) 0.028(6) 0.020(5) -0.001(5) 
C112 0.026(5) 0.055(6) 0.058(6) 0.022(5) 0.012(4) -0.001(4) 
C113 0.020(4) 0.026(4) 0.019(3) -0.003(3) 0.002(3) 0.003(3) 
C114 0.050(6) 0.029(5) 0.031(4) 0.001(4) 0.015(4) 0.012(4) 
C115 0.080(8) 0.030(5) 0.027(4) -0.002(4) 0.003(4) 0.029(5) 
C116 0.036(6) 0.044(5) 0.034(5) -0.017(4) 0.002(4) 0.021(4) 
C117 0.044(6) 0.032(5) 0.040(5) -0.016(4) 0.016(4) 0.002(4) 
C118 0.038(5) 0.018(4) 0.036(4) -0.008(4) 0.012(4) -0.004(3) 
C201 0.017(4) 0.022(4) 0.036(4) -0.002(4) 0.007(3) 0.003(3) 
C202 0.028(5) 0.055(6) 0.031(4) 0.004(4) 0.009(4) 0.017(4) 
C203 0.013(5) 0.074(7) 0.055(6) 0.000(6) 0.013(4) 0.014(4) 
C204 0.025(5) 0.045(5) 0.043(5) -0.016(5) 0.019(4) 0.000(4) 
C205 0.039(6) 0.042(5) 0.042(5) 0.006(4) 0.020(4) 0.008(4) 
C206 0.021(5) 0.032(5) 0.035(4) -0.002(4) 0.007(3) 0.009(3) 
C207 0.016(5) 0.035(5) 0.077(7) 0.022(5) -0.005(4) -0.001(4) 
C208 0.033(6) 0.064(7) 0.095(8) 0.053(7) 0.005(5) 0.009(5) 
C209 0.038(7) 0.078(9) 0.194(17) 0.097(12) -0.027(8) -0.015(7) 
C210 0.037(8) 0.033(7) 0.26(2) 0.050(11) -0.046(10) -0.023(6) 
C211 0.043(8) 0.041(7) 0.186(16) -0.002(9) -0.036(9) -0.007(6) 
C212 0.041(6) 0.026(5) 0.086(8) -0.006(5) -0.006(5) 0.005(4) 
C213 0.016(4) 0.048(5) 0.021(4) 0.005(4) 0.005(3) 0.004(4) 
C214 0.013(4) 0.058(6) 0.031(4) -0.003(4) 0.004(3) 0.007(4) 
C215 0.025(5) 0.093(8) 0.027(4) -0.023(5) 0.005(4) 0.015(5) 
C216 0.030(6) 0.123(11) 0.029(5) -0.021(7) 0.002(4) 0.025(7) 
C217 0.015(5) 0.124(11) 0.043(6) 0.034(7) 0.003(4) 0.022(6) 
C218 0.019(5) 0.074(7) 0.040(5) 0.019(5) 0.010(4) 0.020(4) 
C301 0.026(5) 0.023(4) 0.024(4) -0.005(3) 0.009(3) 0.010(3) 
C302 0.044(6) 0.038(6) 0.088(8) 0.025(6) -0.032(6) -0.012(5) 
C303 0.070(9) 0.040(6) 0.128(11) 0.038(7) -0.048(8) -0.006(6) 
C304 0.055(8) 0.047(6) 0.088(8) 0.007(6) -0.035(6) 0.022(5) 
C305 0.024(6) 0.080(8) 0.039(5) 0.007(5) -0.001(4) 0.016(5) 
C306 0.039(6) 0.042(5) 0.032(4) 0.014(4) 0.004(4) 0.003(4) 
C307 0.016(4) 0.032(4) 0.025(4) -0.004(4) 0.009(3) 0.001(3) 
C308 0.096(9) 0.019(4) 0.033(5) -0.002(4) 0.015(5) 0.003(5) 
C309 0.149(12) 0.026(5) 0.041(6) -0.002(5) 0.025(7) 0.022(6) 
C310 0.073(8) 0.041(6) 0.034(5) -0.022(5) 0.017(5) -0.001(5) 
C311 0.061(7) 0.055(6) 0.020(4) -0.011(4) 0.006(4) 0.010(5) 
C312 0.048(6) 0.032(5) 0.026(4) -0.007(4) -0.003(4) 0.008(4) 
C313 0.025(5) 0.029(4) 0.018(3) 0.004(3) 0.003(3) 0.005(3) 
C314 0.026(5) 0.030(5) 0.038(4) 0.005(4) 0.005(4) 0.008(4) 
C315 0.031(5) 0.030(5) 0.047(5) -0.001(4) 0.004(4) -0.005(4) 
C316 0.019(5) 0.057(6) 0.050(5) 0.015(5) 0.007(4) -0.001(4) 
C317 0.023(5) 0.047(6) 0.043(5) 0.001(5) 0.015(4) 0.004(4) 
C318 0.020(5) 0.030(4) 0.034(4) -0.007(4) 0.007(3) -0.002(3) 
C401 0.021(5) 0.022(4) 0.023(4) -0.004(3) 0.005(3) -0.001(3) 
C402 0.030(5) 0.027(4) 0.029(4) 0.001(4) 0.009(3) 0.004(3) 
C403 0.046(6) 0.030(5) 0.036(5) -0.001(4) 0.020(4) 0.007(4) 
C404 0.033(6) 0.033(5) 0.053(6) -0.013(5) 0.028(4) -0.010(4) 
C405 0.015(5) 0.050(6) 0.048(5) -0.014(5) 0.013(4) 0.005(4) 
C406 0.027(5) 0.044(5) 0.035(4) 0.004(4) 0.010(4) 0.006(4) 
C407 0.018(4) 0.028(4) 0.028(4) 0.010(4) -0.007(3) 0.003(3) 
C408 0.029(5) 0.034(5) 0.034(4) 0.004(4) 0.002(4) 0.005(4) 
C409 0.040(6) 0.030(5) 0.035(5) 0.009(4) 0.001(4) -0.003(4) 
C410 0.041(6) 0.036(5) 0.053(6) 0.003(5) -0.006(4) -0.003(4) 
C411 0.063(7) 0.031(5) 0.034(5) -0.013(4) 0.006(4) 0.004(4) 
C412 0.040(5) 0.026(4) 0.027(4) -0.003(4) 0.012(4) 0.005(4) 
C413 0.011(4) 0.036(4) 0.026(4) -0.004(4) 0.001(3) 0.009(3) 
C414 0.034(5) 0.051(6) 0.023(4) 0.002(4) 0.004(3) 0.016(4) 
C415 0.030(5) 0.057(6) 0.033(5) 0.003(5) 0.004(4) 0.005(4) 
C416 0.020(5) 0.064(6) 0.029(4) -0.006(5) 0.002(3) 0.003(4) 
C417 0.027(5) 0.048(6) 0.043(5) -0.006(5) 0.004(4) -0.006(4) 
C418 0.020(5) 0.041(5) 0.032(4) -0.005(4) 0.002(3) 0.011(4) 
C501 0.022(5) 0.031(4) 0.027(4) -0.004(4) 0.006(3) 0.008(3) 
C502 0.010(4) 0.049(5) 0.034(4) 0.004(4) 0.003(3) -0.003(4) 
C503 0.032(6) 0.060(6) 0.032(4) 0.000(5) 0.002(4) 0.009(5) 
C504 0.042(6) 0.034(5) 0.045(5) -0.004(4) -0.005(4) 0.009(4) 
C505 0.042(6) 0.041(6) 0.063(6) 0.020(5) -0.002(5) 0.006(4) 
C506 0.014(4) 0.042(5) 0.045(5) 0.004(4) 0.001(4) 0.001(4) 
C507 0.014(4) 0.038(5) 0.014(3) -0.001(3) 0.004(3) -0.001(3) 
C508 0.022(5) 0.036(5) 0.040(5) 0.008(4) 0.013(4) 0.007(4) 
C509 0.018(5) 0.063(7) 0.057(6) 0.007(6) 0.009(4) 0.007(4) 
C510 0.017(5) 0.051(6) 0.035(4) 0.003(4) -0.001(3) -0.011(4) 
C511 0.035(6) 0.027(5) 0.059(6) -0.021(5) 0.006(4) -0.009(4) 
C512 0.018(5) 0.037(5) 0.047(5) -0.014(4) 0.005(4) -0.005(4) 
C601 0.027(5) 0.024(4) 0.029(4) -0.002(4) 0.002(3) -0.005(3) 
C602 0.018(5) 0.038(5) 0.052(5) -0.010(5) -0.001(4) -0.001(4) 
C603 0.038(6) 0.048(6) 0.059(6) -0.014(5) -0.017(5) 0.009(5) 
C604 0.042(7) 0.064(7) 0.061(7) -0.021(6) -0.017(5) 0.001(5) 
C605 0.062(9) 0.056(7) 0.085(8) -0.056(6) -0.025(6) 0.014(6) 
C606 0.041(6) 0.033(5) 0.071(7) -0.024(5) -0.021(5) 0.007(4) 
C607 0.029(5) 0.015(4) 0.040(4) -0.004(4) 0.004(4) 0.007(3) 
C608 0.036(5) 0.017(4) 0.034(4) 0.001(4) 0.005(4) 0.004(3) 
C609 0.058(7) 0.022(4) 0.038(5) 0.001(4) 0.002(4) 0.011(4) 
C610 0.055(7) 0.040(5) 0.051(6) 0.013(5) 0.022(5) 0.008(5) 
C611 0.036(6) 0.066(7) 0.065(7) 0.020(6) 0.020(5) 0.005(5) 
C612 0.026(5) 0.045(5) 0.051(5) 0.013(5) 0.012(4) 0.002(4) 
C613 0.022(5) 0.026(4) 0.028(4) -0.009(4) 0.005(3) -0.003(3) 
C614 0.049(6) 0.017(4) 0.050(5) -0.003(4) 0.023(5) -0.001(4) 
C615 0.058(8) 0.044(6) 0.065(7) -0.026(6) 0.037(6) -0.018(5) 
C616 0.036(6) 0.044(6) 0.073(7) -0.022(6) 0.013(5) 0.015(5) 
C617 0.066(8) 0.042(6) 0.044(5) -0.004(5) -0.003(5) 0.033(5) 
C618 0.054(6) 0.035(5) 0.031(4) 0.003(4) 0.007(4) 0.017(4) 
  
_geom_special_details 
; 
 All esds (except the esd in the dihedral angle between two l.s. planes) 
 are estimated using the full covariance matrix.  The cell esds are taken 
 into account individually in the estimation of esds in distances, angles 
 and torsion angles; correlations between esds in cell parameters are only 
 used when they are defined by crystal symmetry.  An approximate (isotropic) 
 treatment of cell esds is used for estimating esds involving l.s. planes. 
; 
  
loop_ 
 _geom_bond_atom_site_label_1 
 _geom_bond_atom_site_label_2 
 _geom_bond_distance 
 _geom_bond_site_symmetry_2 
 _geom_bond_publ_flag 
W1 S9 2.4398(16) . ? 
W1 S7 2.4473(18) . ? 
W1 S13 2.4512(17) . ? 
W1 S12 2.4628(18) . ? 
W1 P1 2.5915(19) . ? 
W1 W2 2.6813(4) . ? 
W1 W4 2.6829(4) . ? 
W1 W3 2.6865(4) . ? 
W1 W5 2.6899(4) . ? 
W2 S14 2.4387(16) . ? 
W2 S11 2.4426(19) . ? 
W2 S7 2.4602(16) . ? 
W2 S9 2.4692(19) . ? 
W2 P2 2.5561(19) . ? 
W2 W5 2.6749(4) . ? 
W2 W3 2.6792(4) . ? 
W2 W6 2.6829(4) . ? 
W3 S14 2.4262(18) . ? 
W3 S12 2.4439(17) . ? 
W3 S9 2.4527(18) . ? 
W3 S10 2.4662(19) . ? 
W3 P3 2.5667(17) . ? 
W3 W4 2.6799(4) . ? 
W3 W6 2.6835(4) . ? 
W4 S12 2.4309(18) . ? 
W4 S13 2.4468(16) . ? 
W4 S10 2.4556(17) . ? 
W4 S8 2.4646(19) . ? 
W4 P4 2.5593(19) . ? 
W4 W5 2.6796(4) . ? 
W4 W6 2.6854(4) . ? 
W5 S13 2.4305(18) . ? 
W5 S11 2.4567(18) . ? 
W5 S8 2.4568(18) . ? 
W5 S7 2.4660(19) . ? 
W5 P5 2.5663(17) . ? 
W5 W6 2.6853(4) . ? 
W6 S14 2.4385(18) . ? 
W6 S10 2.4389(18) . ? 
W6 S8 2.4434(17) . ? 
W6 S11 2.4584(19) . ? 
W6 P6 2.5794(19) . ? 
P1 C101 1.832(8) . ? 
P1 C113 1.833(8) . ? 
P1 C107 1.849(7) . ? 
P2 C207 1.826(8) . ? 
P2 C213 1.837(8) . ? 
P2 C201 1.846(7) . ? 
P3 C313 1.821(8) . ? 
P3 C307 1.824(8) . ? 
P3 C301 1.835(7) . ? 
P4 C413 1.819(7) . ? 
P4 C401 1.837(7) . ? 
P4 C407 1.850(8) . ? 
P5 C507 1.824(7) . ? 
P5 C501 1.826(8) . ? 
P5 C513 1.848(8) . ? 
P6 C601 1.824(5) . ? 
P6 C607 1.834(7) . ? 
P6 C613 1.848(8) . ? 
C101 C106 1.368(11) . ? 
C101 C102 1.379(11) . ? 
C102 C103 1.359(12) . ? 
C103 C104 1.368(13) . ? 
C104 C105 1.317(13) . ? 
C105 C106 1.390(13) . ? 
C107 C108 1.373(11) . ? 
C107 C112 1.387(11) . ? 
C108 C109 1.386(10) . ? 
C109 C110 1.362(13) . ? 
C110 C111 1.355(14) . ? 
C111 C112 1.393(11) . ? 
C113 C118 1.374(9) . ? 
C113 C114 1.385(10) . ? 
C114 C115 1.383(11) . ? 
C115 C116 1.370(12) . ? 
C116 C117 1.366(11) . ? 
C117 C118 1.385(11) . ? 
C201 C206 1.366(9) . ? 
C201 C202 1.393(10) . ? 
C202 C203 1.397(10) . ? 
C203 C204 1.368(11) . ? 
C204 C205 1.377(11) . ? 
C205 C206 1.399(9) . ? 
C207 C212 1.350(11) . ? 
C207 C208 1.411(11) . ? 
C208 C209 1.378(12) . ? 
C209 C210 1.350(15) . ? 
C210 C211 1.371(15) . ? 
C211 C212 1.387(11) . ? 
C213 C218 1.376(10) . ? 
C213 C214 1.404(11) . ? 
C214 C215 1.367(11) . ? 
C215 C216 1.353(13) . ? 
C216 C217 1.353(15) . ? 
C217 C218 1.428(13) . ? 
C301 C302 1.369(10) . ? 
C301 C306 1.388(11) . ? 
C302 C303 1.419(12) . ? 
C303 C304 1.350(14) . ? 
C304 C305 1.345(13) . ? 
C305 C306 1.380(11) . ? 
C307 C308 1.380(10) . ? 
C307 C312 1.409(10) . ? 
C308 C309 1.380(12) . ? 
C309 C310 1.347(12) . ? 
C310 C311 1.377(12) . ? 
C311 C312 1.381(11) . ? 
C313 C314 1.367(10) . ? 
C313 C318 1.411(10) . ? 
C314 C315 1.378(10) . ? 
C315 C316 1.380(12) . ? 
C316 C317 1.372(12) . ? 
C317 C318 1.384(10) . ? 
C401 C406 1.378(11) . ? 
C401 C402 1.387(9) . ? 
C402 C403 1.399(10) . ? 
C403 C404 1.383(13) . ? 
C404 C405 1.380(11) . ? 
C405 C406 1.398(10) . ? 
C407 C408 1.376(10) . ? 
C407 C412 1.412(10) . ? 
C408 C409 1.386(11) . ? 
C409 C410 1.374(12) . ? 
C410 C411 1.383(11) . ? 
C411 C412 1.359(11) . ? 
C413 C418 1.382(11) . ? 
C413 C414 1.401(10) . ? 
C414 C415 1.387(11) . ? 
C415 C416 1.374(12) . ? 
C416 C417 1.382(11) . ? 
C417 C418 1.385(11) . ? 
C501 C502 1.391(10) . ? 
C501 C506 1.401(10) . ? 
C502 C503 1.398(11) . ? 
C503 C504 1.369(11) . ? 
C504 C505 1.371(12) . ? 
C505 C506 1.384(11) . ? 
C507 C508 1.377(10) . ? 
C507 C512 1.390(9) . ? 
C508 C509 1.402(11) . ? 
C509 C510 1.377(12) . ? 
C510 C511 1.352(12) . ? 
C511 C512 1.418(9) . ? 
C601 C602 1.3621 . ? 
C601 C606 1.389(10) . ? 
C602 C603 1.397(10) . ? 
C603 C604 1.353(13) . ? 
C604 C605 1.377(14) . ? 
C605 C606 1.384(13) . ? 
C607 C612 1.397(11) . ? 
C607 C608 1.400(11) . ? 
C608 C609 1.379(10) . ? 
C609 C610 1.396(12) . ? 
C610 C611 1.331(13) . ? 
C611 C612 1.391(11) . ? 
C613 C618 1.362(9) . ? 
C613 C614 1.384(10) . ? 
C614 C615 1.406(12) . ? 
C615 C616 1.364(13) . ? 
C616 C617 1.373(12) . ? 
C617 C618 1.414(10) . ? 
C1S C2S 1.3900 . ? 
C1S C6S 1.3900 . ? 
C2S C3S 1.3899 . ? 
C3S C4S 1.3902 . ? 
C4S C5S 1.3900 . ? 
C5S C6S 1.3899 . ? 
C513 C528 1.320(12) . ? 
C513 C514 1.328(8) . ? 
C513 C518 1.445(8) . ? 
C513 C524 1.493(8) . ? 
C514 C515 1.3899 . ? 
C515 C516 1.3900 . ? 
C524 C525 1.5203 . ? 
C525 C516 1.3850 . ? 
C516 C517 1.3901 . ? 
C516 C527 1.396(12) . ? 
C517 C518 1.3900 . ? 
C527 C528 1.409(15) . ? 
  
loop_ 
 _geom_angle_atom_site_label_1 
 _geom_angle_atom_site_label_2 
 _geom_angle_atom_site_label_3 
 _geom_angle 
 _geom_angle_site_symmetry_1 
 _geom_angle_site_symmetry_3 
 _geom_angle_publ_flag 
S9 W1 S7 90.12(6) . . ? 
S9 W1 S13 171.90(6) . . ? 
S7 W1 S13 89.24(6) . . ? 
S9 W1 S12 89.61(6) . . ? 
S7 W1 S12 171.74(6) . . ? 
S13 W1 S12 89.86(6) . . ? 
S9 W1 P1 91.49(6) . . ? 
S7 W1 P1 90.89(6) . . ? 
S13 W1 P1 96.59(6) . . ? 
S12 W1 P1 97.37(6) . . ? 
S9 W1 W2 57.42(4) . . ? 
S7 W1 W2 57.11(4) . . ? 
S13 W1 W2 115.89(5) . . ? 
S12 W1 W2 116.26(4) . . ? 
P1 W1 W2 131.73(5) . . ? 
S9 W1 W4 116.77(4) . . ? 
S7 W1 W4 116.93(5) . . ? 
S13 W1 W4 56.71(4) . . ? 
S12 W1 W4 56.18(4) . . ? 
P1 W1 W4 138.56(5) . . ? 
W2 W1 W4 89.704(13) . . ? 
S9 W1 W3 56.92(4) . . ? 
S7 W1 W3 116.96(4) . . ? 
S13 W1 W3 116.50(4) . . ? 
S12 W1 W3 56.47(4) . . ? 
P1 W1 W3 135.43(4) . . ? 
W2 W1 W3 59.883(11) . . ? 
W4 W1 W3 59.880(10) . . ? 
S9 W1 W5 117.10(5) . . ? 
S7 W1 W5 57.14(4) . . ? 
S13 W1 W5 56.20(4) . . ? 
S12 W1 W5 115.95(4) . . ? 
P1 W1 W5 134.64(4) . . ? 
W2 W1 W5 59.737(11) . . ? 
W4 W1 W5 59.831(11) . . ? 
W3 W1 W5 89.718(12) . . ? 
S14 W2 S11 89.90(6) . . ? 
S14 W2 S7 172.03(6) . . ? 
S11 W2 S7 90.32(6) . . ? 
S14 W2 S9 89.59(6) . . ? 
S11 W2 S9 172.39(6) . . ? 
S7 W2 S9 89.14(6) . . ? 
S14 W2 P2 89.24(6) . . ? 
S11 W2 P2 85.63(6) . . ? 
S7 W2 P2 98.72(6) . . ? 
S9 W2 P2 101.95(6) . . ? 
S14 W2 W5 116.71(5) . . ? 
S11 W2 W5 57.16(4) . . ? 
S7 W2 W5 57.22(4) . . ? 
S9 W2 W5 116.60(4) . . ? 
P2 W2 W5 132.20(4) . . ? 
S14 W2 W3 56.36(4) . . ? 
S11 W2 W3 117.12(5) . . ? 
S7 W2 W3 116.77(5) . . ? 
S9 W2 W3 56.72(4) . . ? 
P2 W2 W3 136.18(4) . . ? 
W5 W2 W3 90.194(13) . . ? 
S14 W2 W1 116.47(5) . . ? 
S11 W2 W1 117.41(4) . . ? 
S7 W2 W1 56.65(4) . . ? 
S9 W2 W1 56.37(4) . . ? 
P2 W2 W1 143.78(5) . . ? 
W5 W2 W1 60.291(11) . . ? 
W3 W2 W1 60.155(10) . . ? 
S14 W2 W6 56.62(4) . . ? 
S11 W2 W6 57.09(4) . . ? 
S7 W2 W6 117.31(4) . . ? 
S9 W2 W6 116.72(4) . . ? 
P2 W2 W6 125.77(5) . . ? 
W5 W2 W6 60.159(11) . . ? 
W3 W2 W6 60.062(11) . . ? 
W1 W2 W6 90.383(13) . . ? 
S14 W3 S12 172.05(6) . . ? 
S14 W3 S9 90.27(6) . . ? 
S12 W3 S9 89.75(6) . . ? 
S14 W3 S10 89.52(6) . . ? 
S12 W3 S10 89.34(6) . . ? 
S9 W3 S10 171.95(6) . . ? 
S14 W3 P3 87.36(6) . . ? 
S12 W3 P3 100.59(6) . . ? 
S9 W3 P3 91.81(6) . . ? 
S10 W3 P3 96.23(6) . . ? 
S14 W3 W2 56.81(4) . . ? 
S12 W3 W2 117.01(4) . . ? 
S9 W3 W2 57.32(4) . . ? 
S10 W3 W2 116.32(4) . . ? 
P3 W3 W2 128.89(4) . . ? 
S14 W3 W4 116.77(5) . . ? 
S12 W3 W4 56.42(4) . . ? 
S9 W3 W4 116.43(4) . . ? 
S10 W3 W4 56.82(4) . . ? 
P3 W3 W4 141.11(4) . . ? 
W2 W3 W4 89.815(12) . . ? 
S14 W3 W6 56.74(4) . . ? 
S12 W3 W6 116.48(4) . . ? 
S9 W3 W6 117.29(4) . . ? 
S10 W3 W6 56.35(4) . . ? 
P3 W3 W6 131.32(4) . . ? 
W2 W3 W6 60.037(11) . . ? 
W4 W3 W6 60.091(11) . . ? 
S14 W3 W1 116.73(4) . . ? 
S12 W3 W1 57.14(4) . . ? 
S9 W3 W1 56.47(4) . . ? 
S10 W3 W1 116.75(4) . . ? 
P3 W3 W1 137.76(4) . . ? 
W2 W3 W1 59.962(10) . . ? 
W4 W3 W1 59.994(10) . . ? 
W6 W3 W1 90.258(12) . . ? 
S12 W4 S13 90.72(6) . . ? 
S12 W4 S10 89.89(6) . . ? 
S13 W4 S10 171.93(6) . . ? 
S12 W4 S8 172.38(6) . . ? 
S13 W4 S8 89.62(6) . . ? 
S10 W4 S8 88.73(6) . . ? 
S12 W4 P4 84.25(6) . . ? 
S13 W4 P4 89.30(6) . . ? 
S10 W4 P4 98.77(6) . . ? 
S8 W4 P4 103.36(6) . . ? 
S12 W4 W5 117.47(4) . . ? 
S13 W4 W5 56.38(4) . . ? 
S10 W4 W5 116.47(5) . . ? 
S8 W4 W5 56.87(4) . . ? 
P4 W4 W5 137.14(4) . . ? 
S12 W4 W3 56.88(4) . . ? 
S13 W4 W3 116.90(4) . . ? 
S10 W4 W3 57.20(4) . . ? 
S8 W4 W3 116.43(4) . . ? 
P4 W4 W3 131.06(4) . . ? 
W5 W4 W3 90.079(13) . . ? 
S12 W4 W1 57.33(4) . . ? 
S13 W4 W1 56.87(4) . . ? 
S10 W4 W1 117.26(4) . . ? 
S8 W4 W1 117.02(4) . . ? 
P4 W4 W1 124.72(4) . . ? 
W5 W4 W1 60.214(11) . . ? 
W3 W4 W1 60.126(10) . . ? 
S12 W4 W6 116.88(4) . . ? 
S13 W4 W6 116.41(5) . . ? 
S10 W4 W6 56.43(4) . . ? 
S8 W4 W6 56.45(4) . . ? 
P4 W4 W6 144.81(4) . . ? 
W5 W4 W6 60.070(10) . . ? 
W3 W4 W6 60.022(11) . . ? 
W1 W4 W6 90.294(13) . . ? 
S13 W5 S11 172.28(6) . . ? 
S13 W5 S8 90.18(6) . . ? 
S11 W5 S8 89.62(6) . . ? 
S13 W5 S7 89.28(6) . . ? 
S11 W5 S7 89.85(6) . . ? 
S8 W5 S7 172.08(6) . . ? 
S13 W5 P5 88.24(6) . . ? 
S11 W5 P5 99.48(6) . . ? 
S8 W5 P5 92.70(6) . . ? 
S7 W5 P5 95.18(6) . . ? 
S13 W5 W2 116.86(4) . . ? 
S11 W5 W2 56.66(4) . . ? 
S8 W5 W2 116.56(4) . . ? 
S7 W5 W2 57.01(4) . . ? 
P5 W5 W2 139.71(5) . . ? 
S13 W5 W4 56.97(4) . . ? 
S11 W5 W4 116.91(4) . . ? 
S8 W5 W4 57.15(4) . . ? 
S7 W5 W4 116.39(4) . . ? 
P5 W5 W4 130.21(4) . . ? 
W2 W5 W4 89.911(12) . . ? 
S13 W5 W6 117.00(4) . . ? 
S11 W5 W6 56.91(4) . . ? 
S8 W5 W6 56.53(4) . . ? 
S7 W5 W6 117.01(4) . . ? 
P5 W5 W6 137.70(5) . . ? 
W2 W5 W6 60.067(11) . . ? 
W4 W5 W6 60.072(10) . . ? 
S13 W5 W1 56.93(4) . . ? 
S11 W5 W1 116.59(5) . . ? 
S8 W5 W1 117.04(5) . . ? 
S7 W5 W1 56.47(4) . . ? 
P5 W5 W1 131.76(5) . . ? 
W2 W5 W1 59.972(11) . . ? 
W4 W5 W1 59.955(11) . . ? 
W6 W5 W1 90.146(12) . . ? 
S14 W6 S10 89.88(6) . . ? 
S14 W6 S8 171.86(6) . . ? 
S10 W6 S8 89.60(6) . . ? 
S14 W6 S11 89.53(6) . . ? 
S10 W6 S11 172.28(6) . . ? 
S8 W6 S11 89.89(6) . . ? 
S14 W6 P6 93.75(6) . . ? 
S10 W6 P6 91.31(6) . . ? 
S8 W6 P6 94.38(6) . . ? 
S11 W6 P6 96.41(6) . . ? 
S14 W6 W2 56.63(4) . . ? 
S10 W6 W2 117.16(5) . . ? 
S8 W6 W2 116.74(4) . . ? 
S11 W6 W2 56.53(5) . . ? 
P6 W6 W2 136.27(5) . . ? 
S14 W6 W3 56.30(4) . . ? 
S10 W6 W3 57.32(5) . . ? 
S8 W6 W3 117.05(5) . . ? 
S11 W6 W3 116.39(5) . . ? 
P6 W6 W3 132.92(4) . . ? 
W2 W6 W3 59.901(11) . . ? 
S14 W6 W5 116.34(4) . . ? 
S10 W6 W5 116.85(4) . . ? 
S8 W6 W5 57.01(4) . . ? 
S11 W6 W5 56.85(4) . . ? 
P6 W6 W5 137.18(4) . . ? 
W2 W6 W5 59.774(11) . . ? 
W3 W6 W5 89.879(12) . . ? 
S14 W6 W4 116.12(4) . . ? 
S10 W6 W4 57.02(4) . . ? 
S8 W6 W4 57.21(5) . . ? 
S11 W6 W4 116.64(4) . . ? 
P6 W6 W4 134.04(5) . . ? 
W2 W6 W4 89.619(13) . . ? 
W3 W6 W4 59.887(11) . . ? 
W5 W6 W4 59.858(10) . . ? 
W1 S7 W2 66.23(4) . . ? 
W1 S7 W5 66.39(5) . . ? 
W2 S7 W5 65.77(4) . . ? 
W6 S8 W5 66.46(5) . . ? 
W6 S8 W4 66.34(5) . . ? 
W5 S8 W4 65.98(5) . . ? 
W1 S9 W3 66.61(5) . . ? 
W1 S9 W2 66.21(5) . . ? 
W3 S9 W2 65.96(5) . . ? 
W6 S10 W4 66.55(4) . . ? 
W6 S10 W3 66.33(5) . . ? 
W4 S10 W3 65.98(5) . . ? 
W2 S11 W5 66.18(5) . . ? 
W2 S11 W6 66.38(5) . . ? 
W5 S11 W6 66.23(5) . . ? 
W4 S12 W3 66.70(5) . . ? 
W4 S12 W1 66.49(5) . . ? 
W3 S12 W1 66.39(5) . . ? 
W5 S13 W4 66.65(4) . . ? 
W5 S13 W1 66.87(4) . . ? 
W4 S13 W1 66.43(4) . . ? 
W3 S14 W6 66.96(4) . . ? 
W3 S14 W2 66.83(4) . . ? 
W6 S14 W2 66.74(4) . . ? 
C101 P1 C113 103.0(3) . . ? 
C101 P1 C107 102.7(3) . . ? 
C113 P1 C107 101.2(3) . . ? 
C101 P1 W1 115.3(2) . . ? 
C113 P1 W1 115.7(2) . . ? 
C107 P1 W1 116.8(3) . . ? 
C207 P2 C213 104.8(4) . . ? 
C207 P2 C201 101.9(4) . . ? 
C213 P2 C201 101.1(3) . . ? 
C207 P2 W2 111.8(3) . . ? 
C213 P2 W2 116.0(3) . . ? 
C201 P2 W2 119.3(2) . . ? 
C313 P3 C307 102.3(3) . . ? 
C313 P3 C301 104.7(3) . . ? 
C307 P3 C301 101.9(3) . . ? 
C313 P3 W3 112.8(2) . . ? 
C307 P3 W3 121.3(2) . . ? 
C301 P3 W3 112.1(2) . . ? 
C413 P4 C401 100.9(3) . . ? 
C413 P4 C407 104.4(3) . . ? 
C401 P4 C407 101.1(3) . . ? 
C413 P4 W4 117.2(2) . . ? 
C401 P4 W4 119.1(2) . . ? 
C407 P4 W4 111.9(2) . . ? 
C507 P5 C501 103.2(3) . . ? 
C507 P5 C513 101.4(3) . . ? 
C501 P5 C513 101.4(3) . . ? 
C507 P5 W5 111.7(2) . . ? 
C501 P5 W5 115.6(2) . . ? 
C513 P5 W5 121.2(2) . . ? 
C601 P6 C607 104.2(3) . . ? 
C601 P6 C613 100.7(3) . . ? 
C607 P6 C613 102.9(3) . . ? 
C601 P6 W6 116.57(17) . . ? 
C607 P6 W6 115.3(3) . . ? 
C613 P6 W6 115.2(2) . . ? 
C106 C101 C102 117.2(8) . . ? 
C106 C101 P1 122.8(6) . . ? 
C102 C101 P1 120.1(6) . . ? 
C103 C102 C101 120.4(9) . . ? 
C102 C103 C104 121.8(9) . . ? 
C105 C104 C103 117.9(9) . . ? 
C104 C105 C106 122.0(10) . . ? 
C101 C106 C105 120.4(9) . . ? 
C108 C107 C112 118.2(7) . . ? 
C108 C107 P1 118.2(6) . . ? 
C112 C107 P1 123.5(6) . . ? 
C107 C108 C109 120.8(9) . . ? 
C110 C109 C108 120.8(9) . . ? 
C111 C110 C109 119.0(8) . . ? 
C110 C111 C112 121.3(9) . . ? 
C107 C112 C111 119.9(9) . . ? 
C118 C113 C114 117.6(7) . . ? 
C118 C113 P1 119.5(6) . . ? 
C114 C113 P1 122.9(5) . . ? 
C115 C114 C113 121.2(7) . . ? 
C116 C115 C114 119.9(8) . . ? 
C117 C116 C115 119.7(8) . . ? 
C116 C117 C118 120.0(7) . . ? 
C113 C118 C117 121.4(7) . . ? 
C206 C201 C202 119.8(7) . . ? 
C206 C201 P2 121.2(6) . . ? 
C202 C201 P2 119.0(6) . . ? 
C201 C202 C203 119.8(7) . . ? 
C204 C203 C202 119.9(8) . . ? 
C203 C204 C205 120.3(7) . . ? 
C204 C205 C206 119.9(8) . . ? 
C201 C206 C205 120.1(7) . . ? 
C212 C207 C208 117.8(8) . . ? 
C212 C207 P2 122.9(7) . . ? 
C208 C207 P2 119.0(7) . . ? 
C209 C208 C207 118.1(10) . . ? 
C210 C209 C208 123.8(11) . . ? 
C209 C210 C211 117.7(10) . . ? 
C210 C211 C212 120.0(11) . . ? 
C207 C212 C211 122.5(10) . . ? 
C218 C213 C214 118.7(8) . . ? 
C218 C213 P2 124.6(7) . . ? 
C214 C213 P2 116.6(6) . . ? 
C215 C214 C213 120.8(8) . . ? 
C216 C215 C214 120.7(11) . . ? 
C215 C216 C217 120.4(10) . . ? 
C216 C217 C218 120.6(9) . . ? 
C213 C218 C217 118.7(9) . . ? 
C302 C301 C306 119.1(7) . . ? 
C302 C301 P3 123.8(7) . . ? 
C306 C301 P3 117.1(5) . . ? 
C301 C302 C303 119.0(9) . . ? 
C304 C303 C302 120.6(9) . . ? 
C305 C304 C303 120.1(9) . . ? 
C304 C305 C306 120.9(9) . . ? 
C305 C306 C301 120.2(8) . . ? 
C308 C307 C312 117.5(8) . . ? 
C308 C307 P3 121.0(6) . . ? 
C312 C307 P3 121.3(6) . . ? 
C309 C308 C307 118.6(8) . . ? 
C310 C309 C308 124.2(9) . . ? 
C309 C310 C311 118.5(9) . . ? 
C310 C311 C312 119.2(8) . . ? 
C311 C312 C307 122.0(8) . . ? 
C314 C313 C318 117.6(7) . . ? 
C314 C313 P3 121.0(6) . . ? 
C318 C313 P3 121.1(6) . . ? 
C313 C314 C315 122.3(8) . . ? 
C314 C315 C316 119.5(8) . . ? 
C317 C316 C315 119.9(8) . . ? 
C316 C317 C318 120.4(8) . . ? 
C317 C318 C313 120.2(8) . . ? 
C406 C401 C402 119.6(7) . . ? 
C406 C401 P4 120.4(5) . . ? 
C402 C401 P4 120.0(6) . . ? 
C401 C402 C403 120.2(8) . . ? 
C404 C403 C402 118.8(8) . . ? 
C405 C404 C403 121.8(7) . . ? 
C404 C405 C406 118.3(8) . . ? 
C401 C406 C405 121.2(7) . . ? 
C408 C407 C412 117.6(7) . . ? 
C408 C407 P4 122.2(6) . . ? 
C412 C407 P4 120.0(5) . . ? 
C407 C408 C409 120.9(8) . . ? 
C410 C409 C408 121.3(8) . . ? 
C409 C410 C411 117.8(8) . . ? 
C412 C411 C410 121.8(8) . . ? 
C411 C412 C407 120.5(7) . . ? 
C418 C413 C414 118.0(7) . . ? 
C418 C413 P4 117.5(6) . . ? 
C414 C413 P4 124.0(6) . . ? 
C415 C414 C413 121.2(8) . . ? 
C416 C415 C414 119.3(8) . . ? 
C415 C416 C417 120.5(8) . . ? 
C416 C417 C418 119.9(8) . . ? 
C413 C418 C417 121.0(8) . . ? 
C502 C501 C506 116.8(7) . . ? 
C502 C501 P5 120.3(5) . . ? 
C506 C501 P5 122.8(6) . . ? 
C501 C502 C503 122.0(7) . . ? 
C504 C503 C502 118.8(9) . . ? 
C503 C504 C505 121.0(8) . . ? 
C504 C505 C506 119.9(8) . . ? 
C505 C506 C501 121.3(8) . . ? 
C508 C507 C512 119.3(7) . . ? 
C508 C507 P5 122.9(6) . . ? 
C512 C507 P5 117.7(5) . . ? 
C507 C508 C509 122.0(8) . . ? 
C510 C509 C508 118.1(8) . . ? 
C511 C510 C509 120.8(8) . . ? 
C510 C511 C512 121.6(8) . . ? 
C507 C512 C511 118.1(6) . . ? 
C602 C601 C606 117.0(4) . . ? 
C602 C601 P6 121.11(17) . . ? 
C606 C601 P6 121.9(5) . . ? 
C601 C602 C603 121.1(5) . . ? 
C604 C603 C602 121.3(9) . . ? 
C603 C604 C605 118.8(9) . . ? 
C604 C605 C606 119.8(10) . . ? 
C605 C606 C601 122.0(9) . . ? 
C612 C607 C608 117.6(7) . . ? 
C612 C607 P6 122.4(6) . . ? 
C608 C607 P6 120.0(6) . . ? 
C609 C608 C607 120.8(8) . . ? 
C608 C609 C610 120.0(8) . . ? 
C611 C610 C609 119.7(8) . . ? 
C610 C611 C612 121.7(9) . . ? 
C611 C612 C607 120.2(9) . . ? 
C618 C613 C614 121.8(7) . . ? 
C618 C613 P6 122.5(5) . . ? 
C614 C613 P6 115.8(6) . . ? 
C613 C614 C615 118.9(8) . . ? 
C616 C615 C614 121.1(8) . . ? 
C615 C616 C617 118.3(9) . . ? 
C616 C617 C618 122.6(8) . . ? 
C613 C618 C617 117.3(6) . . ? 
C2S C1S C6S 120.0 . . ? 
C3S C2S C1S 120.0 . . ? 
C2S C3S C4S 120.0 . . ? 
C5S C4S C3S 120.0 . . ? 
C6S C5S C4S 120.0 . . ? 
C5S C6S C1S 120.0 . . ? 
C528 C513 C514 109.5(10) . . ? 
C528 C513 C518 40.1(9) . . ? 
C514 C513 C518 120.4(8) . . ? 
C528 C513 C524 125.7(10) . . ? 
C514 C513 C524 25.50(14) . . ? 
C518 C513 C524 117.7(7) . . ? 
C528 C513 P5 121.4(9) . . ? 
C514 C513 P5 119.2(5) . . ? 
C518 C513 P5 119.8(5) . . ? 
C524 C513 P5 111.9(5) . . ? 
C513 C514 C515 120.8(4) . . ? 
C514 C515 C516 120.0 . . ? 
C513 C524 C525 106.3(4) . . ? 
C516 C525 C524 125.2 . . ? 
C525 C516 C515 20.4 . . ? 
C525 C516 C517 116.9 . . ? 
C515 C516 C517 120.0 . . ? 
C525 C516 C527 115.8(8) . . ? 
C515 C516 C527 103.2(8) . . ? 
C517 C516 C527 43.7(10) . . ? 
C518 C517 C516 120.0 . . ? 
C517 C518 C513 118.1(4) . . ? 
C516 C527 C528 117.4(14) . . ? 
C513 C528 C527 122.1(13) . . ? 
  
_diffrn_measured_fraction_theta_max    0.975 
_diffrn_reflns_theta_full              27.10 
_diffrn_measured_fraction_theta_full   0.975 
_refine_diff_density_max    2.828 
_refine_diff_density_min   -1.731 
_refine_diff_density_rms    0.182 

#===END
 
data_new1 
  
_audit_creation_method            SHELXL-97 
_chemical_name_systematic 
; 
octakis(\m~3~-sulfido)-hexakis(tert-butylisocyanide)-hexa-tungsten 
tetrakis(benzene) solvate 
; 
_chemical_name_common             'Tungsten Sulfide cluster' 
_chemical_melting_point           'not measured' 
_chemical_formula_moiety          'W6 S8 (C5H9N)6' 
_chemical_formula_sum 
 'C54 H78 N6 S8 W6' 
_chemical_formula_weight          2170.80 
  
loop_ 
 _atom_type_symbol 
 _atom_type_description 
 _atom_type_scat_dispersion_real 
 _atom_type_scat_dispersion_imag 
 _atom_type_scat_source 
 'C'  'C'   0.0033   0.0016 
 'International Tables Vol C Tables 4.2.6.8 and 6.1.1.4' 
 'H'  'H'   0.0000   0.0000 
 'International Tables Vol C Tables 4.2.6.8 and 6.1.1.4' 
 'N'  'N'   0.0061   0.0033 
 'International Tables Vol C Tables 4.2.6.8 and 6.1.1.4' 
 'S'  'S'   0.1246   0.1234 
 'International Tables Vol C Tables 4.2.6.8 and 6.1.1.4' 
 'W'  'W'  -0.8490   6.8722 
 'International Tables Vol C Tables 4.2.6.8 and 6.1.1.4' 
  
_symmetry_cell_setting 
; 
octakis(\m~3~-sulfido)-hexakis(tert-butylisocyanide)-hexa-tungsten 
tetrakis(benzene) solvate 
; 
_symmetry_space_group_name_H-M    P-1 
  
loop_ 
 _symmetry_equiv_pos_as_xyz 
 'x, y, z' 
 '-x, -y, -z' 
  
_cell_length_a                    12.1751(6) 
_cell_length_b                    12.5456(6) 
_cell_length_c                    12.7678(6) 
_cell_angle_alpha                 111.5324(11) 
_cell_angle_beta                  110.3392(11) 
_cell_angle_gamma                 93.1387(11) 
_cell_volume                      1663.41(14) 
_cell_formula_units_Z             1 
_cell_measurement_temperature     173(2) 
_cell_measurement_reflns_used     ? 
_cell_measurement_theta_min       ? 
_cell_measurement_theta_max       ? 
  
_exptl_crystal_description        ROD 
_exptl_crystal_colour             RED 
_exptl_crystal_size_max           0.18 
_exptl_crystal_size_mid           0.04 
_exptl_crystal_size_min           0.04 
_exptl_crystal_density_meas       'NOT MEASURED' 
_exptl_crystal_density_diffrn     2.167 
_exptl_crystal_density_method     'not measured' 
_exptl_crystal_F_000              1016 
_exptl_absorpt_coefficient_mu     10.619 
_exptl_absorpt_correction_type    EMPIRICAL 
_exptl_absorpt_correction_T_min   0.3644 
_exptl_absorpt_correction_T_max   1.000 
_exptl_absorpt_process_details    ? 
  
_exptl_special_details 
; 
Absorption correction was done with SADABS beta Version.
This program only gives ratios of max and min absorptions.
; 
  
_diffrn_ambient_temperature       173(2) 
_diffrn_radiation_wavelength      0.71073 
_diffrn_radiation_type            MoK\a 
_diffrn_radiation_source          'fine-focus sealed tube' 
_diffrn_radiation_monochromator   graphite 
_diffrn_measurement_device_type   ? 
_diffrn_measurement_method        '\w scans' 
_diffrn_detector_area_resol_mean  ? 
_diffrn_standards_number          ? 
_diffrn_standards_interval_count  ? 
_diffrn_standards_interval_time   ? 
_diffrn_standards_decay_%         0 
_diffrn_reflns_number             18014 
_diffrn_reflns_av_R_equivalents   0.0536 
_diffrn_reflns_av_sigmaI/netI     0.0701 
_diffrn_reflns_limit_h_min        -15 
_diffrn_reflns_limit_h_max        15 
_diffrn_reflns_limit_k_min        -15 
_diffrn_reflns_limit_k_max        15 
_diffrn_reflns_limit_l_min        -15 
_diffrn_reflns_limit_l_max        14 
_diffrn_reflns_theta_min          2.81 
_diffrn_reflns_theta_max          26.39 
_reflns_number_total              6799 
_reflns_number_gt                 4978 
_reflns_threshold_expression      >2sigma(I) 
  
_computing_data_collection        'BRUKER SMART' 
_computing_cell_refinement        'Bruker SAINT Plus' 
_computing_data_reduction         SHELXTL 
_computing_structure_solution     'SHELXS-97 (Sheldrick, 1990)' 
_computing_structure_refinement   'SHELXL-97 (Sheldrick, 1997)' 
_computing_molecular_graphics     SHELXTL 
_computing_publication_material   SHELXTL 
  
_refine_special_details 
; 
 Refinement of F^2^ against ALL reflections.  The weighted R-factor wR and 
 goodness of fit S are based on F^2^, conventional R-factors R are based 
 on F, with F set to zero for negative F^2^. The threshold expression of 
 F^2^ > 2sigma(F^2^) is used only for calculating R-factors(gt) etc. and is 
 not relevant to the choice of reflections for refinement.  R-factors based 
 on F^2^ are statistically about twice as large as those based on F, and R- 
 factors based on ALL data will be even larger. 
; 
  
_refine_ls_structure_factor_coef  Fsqd 
_refine_ls_matrix_type            full 
_refine_ls_weighting_scheme       calc 
_refine_ls_weighting_details 
 'calc w=1/[\s^2^(Fo^2^)+(0.0418P)^2^+0.0000P] where P=(Fo^2^+2Fc^2^)/3' 
_atom_sites_solution_primary      direct 
_atom_sites_solution_secondary    difmap 
_atom_sites_solution_hydrogens    geom 
_refine_ls_hydrogen_treatment     mixed 
_refine_ls_extinction_method      none 
_refine_ls_extinction_coef        ? 
_refine_ls_number_reflns          6799 
_refine_ls_number_parameters      274 
_refine_ls_number_restraints      0 
_refine_ls_R_factor_all           0.0693 
_refine_ls_R_factor_gt            0.0412 
_refine_ls_wR_factor_ref          0.0910 
_refine_ls_wR_factor_gt           0.0823 
_refine_ls_goodness_of_fit_ref    0.993 
_refine_ls_restrained_S_all       0.993 
_refine_ls_shift/su_max           0.003 
_refine_ls_shift/su_mean          0.000 
  
loop_ 
 _atom_site_label 
 _atom_site_type_symbol 
 _atom_site_fract_x 
 _atom_site_fract_y 
 _atom_site_fract_z 
 _atom_site_U_iso_or_equiv 
 _atom_site_adp_type 
 _atom_site_occupancy 
 _atom_site_symmetry_multiplicity 
 _atom_site_calc_flag 
 _atom_site_refinement_flags 
 _atom_site_disorder_assembly 
 _atom_site_disorder_group 
W1 W 0.94651(3) -0.07588(3) 0.32710(3) 0.01353(10) Uani 1 1 d . . . 
W2 W 0.93918(3) 0.13211(3) 0.48498(3) 0.01379(10) Uani 1 1 d . . . 
W3 W 1.14927(3) 0.06580(3) 0.51048(3) 0.01356(10) Uani 1 1 d . . . 
S1 S 1.0333(2) 0.1112(2) 0.3388(2) 0.0223(5) Uani 1 1 d . . . 
S2 S 0.7592(2) -0.0095(2) 0.3189(2) 0.0204(5) Uani 1 1 d . . . 
S3 S 0.8709(2) -0.2495(2) 0.3460(2) 0.0215(5) Uani 1 1 d . . . 
S4 S 1.1421(2) -0.1293(2) 0.3651(2) 0.0214(5) Uani 1 1 d . . . 
C11 C 0.8772(8) -0.1627(8) 0.1308(9) 0.021(2) Uani 1 1 d . . . 
N1 N 0.8319(7) -0.2104(7) 0.0244(7) 0.0249(19) Uani 1 1 d . . . 
C12 C 0.7663(9) -0.2639(9) -0.1071(9) 0.027(2) Uani 1 1 d . . . 
C13 C 0.8428(11) -0.2244(12) -0.1648(11) 0.053(4) Uani 1 1 d . . . 
H13A H 0.9168 -0.2543 -0.1474 0.079 Uiso 1 1 calc R . . 
H13B H 0.8627 -0.1386 -0.1302 0.079 Uiso 1 1 calc R . . 
H13C H 0.7979 -0.2551 -0.2537 0.079 Uiso 1 1 calc R . . 
C14 C 0.7422(10) -0.3950(9) -0.1485(10) 0.039(3) Uani 1 1 d . . . 
H14A H 0.6930 -0.4169 -0.1101 0.059 Uiso 1 1 calc R . . 
H14B H 0.8184 -0.4203 -0.1244 0.059 Uiso 1 1 calc R . . 
H14C H 0.6997 -0.4330 -0.2379 0.059 Uiso 1 1 calc R . . 
C15 C 0.6515(10) -0.2193(10) -0.1347(10) 0.046(3) Uani 1 1 d . . . 
H15A H 0.6027 -0.2453 -0.0981 0.069 Uiso 1 1 calc R . . 
H15B H 0.6069 -0.2502 -0.2236 0.069 Uiso 1 1 calc R . . 
H15C H 0.6703 -0.1335 -0.1001 0.069 Uiso 1 1 calc R . . 
C21 C 0.8689(8) 0.2779(8) 0.4548(8) 0.020(2) Uani 1 1 d . . . 
N2 N 0.8318(7) 0.3516(7) 0.4294(8) 0.027(2) Uani 1 1 d . . . 
C22 C 0.7892(8) 0.4351(9) 0.3792(9) 0.026(2) Uani 1 1 d . . . 
C23 C 0.8077(10) 0.5507(9) 0.4846(10) 0.035(3) Uani 1 1 d . . . 
H23A H 0.8936 0.5814 0.5344 0.053 Uiso 1 1 calc R . . 
H23B H 0.7677 0.5390 0.5353 0.053 Uiso 1 1 calc R . . 
H23C H 0.7738 0.6067 0.4523 0.053 Uiso 1 1 calc R . . 
C24 C 0.8564(10) 0.4444(10) 0.3028(11) 0.038(3) Uani 1 1 d . . . 
H24A H 0.9416 0.4767 0.3555 0.056 Uiso 1 1 calc R . . 
H24B H 0.8245 0.4961 0.2631 0.056 Uiso 1 1 calc R . . 
H24C H 0.8470 0.3664 0.2401 0.056 Uiso 1 1 calc R . . 
C25 C 0.6564(9) 0.3859(10) 0.2995(10) 0.037(3) Uani 1 1 d . . . 
H25A H 0.6462 0.3109 0.2321 0.056 Uiso 1 1 calc R . . 
H25B H 0.6225 0.4412 0.2661 0.056 Uiso 1 1 calc R . . 
H25C H 0.6151 0.3739 0.3492 0.056 Uiso 1 1 calc R . . 
C31 C 1.3189(8) 0.1460(8) 0.5240(8) 0.022(2) Uani 1 1 d . . . 
N3 N 1.4077(6) 0.1902(7) 0.5336(8) 0.0241(19) Uani 1 1 d . . . 
C32 C 1.5213(8) 0.2496(8) 0.5475(9) 0.024(2) Uani 1 1 d . . . 
C33 C 1.5592(9) 0.1671(9) 0.4538(10) 0.035(3) Uani 1 1 d . . . 
H33A H 1.5722 0.0974 0.4701 0.053 Uiso 1 1 calc R . . 
H33B H 1.6337 0.2061 0.4582 0.053 Uiso 1 1 calc R . . 
H33C H 1.4964 0.1440 0.3718 0.053 Uiso 1 1 calc R . . 
C34 C 1.6099(9) 0.2811(11) 0.6743(11) 0.043(3) Uani 1 1 d . . . 
H34A H 1.6236 0.2095 0.6866 0.065 Uiso 1 1 calc R . . 
H34B H 1.5791 0.3292 0.7333 0.065 Uiso 1 1 calc R . . 
H34C H 1.6856 0.3254 0.6867 0.065 Uiso 1 1 calc R . . 
C35 C 1.5009(10) 0.3594(10) 0.5278(10) 0.039(3) Uani 1 1 d . . . 
H35A H 1.4759 0.4108 0.5904 0.058 Uiso 1 1 calc R . . 
H35B H 1.4381 0.3387 0.4463 0.058 Uiso 1 1 calc R . . 
H35C H 1.5753 0.4001 0.5338 0.058 Uiso 1 1 calc R . . 
C1S C 1.8102(16) 0.0920(15) 0.9315(17) 0.089(5) Uiso 1 1 d . . . 
H1SA H 1.8802 0.0828 0.9148 0.107 Uiso 1 1 calc R . . 
C2S C 1.8089(17) 0.1075(15) 1.0384(17) 0.091(6) Uiso 1 1 d . . . 
H2SA H 1.8843 0.1208 1.1026 0.110 Uiso 1 1 calc R . . 
C3S C 1.7168(14) 0.1068(13) 1.0659(15) 0.076(5) Uiso 1 1 d . . . 
H3SA H 1.7242 0.1120 1.1442 0.091 Uiso 1 1 calc R . . 
C4S C 1.5963(14) 0.0975(13) 0.9699(14) 0.068(4) Uiso 1 1 d . . . 
H4SA H 1.5249 0.0972 0.9844 0.082 Uiso 1 1 calc R . . 
C5S C 1.5981(11) 0.0894(10) 0.8589(11) 0.044(3) Uiso 1 1 d . . . 
H5SA H 1.5269 0.0836 0.7933 0.053 Uiso 1 1 calc R . . 
C6S C 1.7057(13) 0.0900(12) 0.8473(14) 0.064(4) Uiso 1 1 d . . . 
H6SA H 1.7065 0.0889 0.7728 0.077 Uiso 1 1 calc R . . 
C7S C 1.0614(9) -0.3865(10) 0.0724(10) 0.035(3) Uiso 1 1 d . . . 
H7SA H 1.1040 -0.3078 0.1227 0.052 Uiso 1 1 calc R . . 
C8S C 0.9914(9) -0.4408(10) 0.1094(10) 0.036(3) Uiso 1 1 d . . . 
H8SA H 0.9854 -0.3996 0.1855 0.043 Uiso 1 1 calc R . . 
C9S C 0.9299(10) -0.5544(10) 0.0373(10) 0.036(3) Uiso 1 1 d . . . 
H9SA H 0.8815 -0.5919 0.0635 0.053 Uiso 1 1 calc R . . 
C10S C 0.5506(11) -0.3837(11) 0.0717(11) 0.047(3) Uiso 1 1 d . . . 
H10A H 0.5854 -0.3028 0.1209 0.071 Uiso 1 1 calc R . . 
C11S C 0.6228(11) -0.4650(10) 0.0601(11) 0.043(3) Uiso 1 1 d . . . 
H11A H 0.7074 -0.4406 0.1022 0.051 Uiso 1 1 calc R . . 
C12S C 0.5722(10) -0.5794(11) -0.0114(11) 0.043(3) Uiso 1 1 d . . . 
H12A H 0.6218 -0.6352 -0.0203 0.064 Uiso 1 1 calc R . . 
  
loop_ 
 _atom_site_aniso_label 
 _atom_site_aniso_U_11 
 _atom_site_aniso_U_22 
 _atom_site_aniso_U_33 
 _atom_site_aniso_U_23 
 _atom_site_aniso_U_13 
 _atom_site_aniso_U_12 
W1 0.01222(18) 0.0150(2) 0.01235(19) 0.00511(15) 0.00424(14) 0.00334(14) 
W2 0.01264(18) 0.0134(2) 0.01627(19) 0.00730(15) 0.00524(15) 0.00485(14) 
W3 0.00963(18) 0.0156(2) 0.01595(19) 0.00708(15) 0.00502(14) 0.00223(14) 
S1 0.0257(13) 0.0233(13) 0.0206(13) 0.0123(11) 0.0094(10) 0.0015(10) 
S2 0.0157(12) 0.0249(13) 0.0188(12) 0.0105(11) 0.0032(10) 0.0052(10) 
S3 0.0235(13) 0.0124(12) 0.0224(13) 0.0042(10) 0.0057(10) -0.0008(10) 
S4 0.0204(12) 0.0249(14) 0.0206(13) 0.0066(11) 0.0123(10) 0.0089(10) 
C11 0.024(5) 0.020(5) 0.019(5) 0.008(4) 0.008(4) 0.008(4) 
N1 0.022(4) 0.024(5) 0.022(5) 0.004(4) 0.007(4) 0.009(4) 
C12 0.026(5) 0.027(6) 0.014(5) -0.004(4) 0.006(4) 0.000(4) 
C13 0.054(8) 0.059(9) 0.028(7) 0.009(6) 0.008(6) 0.001(7) 
C14 0.044(7) 0.031(7) 0.023(6) -0.002(5) 0.005(5) 0.000(5) 
C15 0.041(7) 0.042(8) 0.030(7) 0.006(6) -0.004(5) 0.006(6) 
C21 0.022(5) 0.013(5) 0.022(5) 0.007(4) 0.007(4) -0.002(4) 
N2 0.020(4) 0.022(5) 0.045(6) 0.021(4) 0.012(4) 0.007(4) 
C22 0.021(5) 0.032(6) 0.035(6) 0.023(5) 0.012(5) 0.008(4) 
C23 0.038(6) 0.025(6) 0.053(7) 0.020(6) 0.023(6) 0.019(5) 
C24 0.038(6) 0.038(7) 0.047(7) 0.021(6) 0.025(6) 0.010(5) 
C25 0.033(6) 0.042(7) 0.039(7) 0.022(6) 0.011(5) 0.012(5) 
C31 0.023(5) 0.029(6) 0.018(5) 0.015(4) 0.006(4) 0.004(4) 
N3 0.007(4) 0.029(5) 0.036(5) 0.014(4) 0.008(4) 0.000(3) 
C32 0.011(5) 0.023(5) 0.035(6) 0.013(5) 0.005(4) -0.002(4) 
C33 0.028(6) 0.033(7) 0.043(7) 0.014(6) 0.012(5) 0.011(5) 
C34 0.028(6) 0.051(8) 0.046(7) 0.023(6) 0.007(5) 0.002(6) 
C35 0.039(7) 0.048(8) 0.032(6) 0.018(6) 0.015(5) 0.010(6) 
  
_geom_special_details 
; 
 All esds (except the esd in the dihedral angle between two l.s. planes) 
 are estimated using the full covariance matrix.  The cell esds are taken 
 into account individually in the estimation of esds in distances, angles 
 and torsion angles; correlations between esds in cell parameters are only 
 used when they are defined by crystal symmetry.  An approximate (isotropic) 
 treatment of cell esds is used for estimating esds involving l.s. planes. 
; 
  
loop_ 
 _geom_bond_atom_site_label_1 
 _geom_bond_atom_site_label_2 
 _geom_bond_distance 
 _geom_bond_site_symmetry_2 
 _geom_bond_publ_flag 
W1 C11 2.146(9) . ? 
W1 S4 2.443(2) . ? 
W1 S3 2.443(2) . ? 
W1 S1 2.452(2) . ? 
W1 S2 2.452(2) . ? 
W1 W2 2.6776(5) . ? 
W1 W3 2.6798(5) 2_756 ? 
W1 W3 2.6799(5) . ? 
W1 W2 2.6870(5) 2_756 ? 
W2 C21 2.165(10) . ? 
W2 S3 2.449(2) 2_756 ? 
W2 S4 2.451(2) 2_756 ? 
W2 S1 2.455(2) . ? 
W2 S2 2.456(2) . ? 
W2 W3 2.6803(5) 2_756 ? 
W2 W3 2.6821(5) . ? 
W2 W1 2.6870(5) 2_756 ? 
W3 C31 2.169(9) . ? 
W3 S4 2.444(2) . ? 
W3 S1 2.444(3) . ? 
W3 S3 2.450(2) 2_756 ? 
W3 S2 2.452(2) 2_756 ? 
W3 W1 2.6798(5) 2_756 ? 
W3 W2 2.6803(5) 2_756 ? 
S2 W3 2.452(2) 2_756 ? 
S3 W2 2.449(2) 2_756 ? 
S3 W3 2.450(2) 2_756 ? 
S4 W2 2.451(2) 2_756 ? 
C11 N1 1.163(11) . ? 
N1 C12 1.446(12) . ? 
C12 C14 1.507(14) . ? 
C12 C15 1.510(15) . ? 
C12 C13 1.533(15) . ? 
C21 N2 1.153(12) . ? 
N2 C22 1.448(12) . ? 
C22 C24 1.504(14) . ? 
C22 C23 1.512(14) . ? 
C22 C25 1.522(13) . ? 
C31 N3 1.133(11) . ? 
N3 C32 1.455(11) . ? 
C32 C34 1.488(14) . ? 
C32 C33 1.497(14) . ? 
C32 C35 1.507(14) . ? 
C1S C2S 1.31(2) . ? 
C1S C6S 1.34(2) . ? 
C2S C3S 1.29(2) . ? 
C3S C4S 1.51(2) . ? 
C4S C5S 1.391(19) . ? 
C5S C6S 1.369(17) . ? 
C7S C8S 1.366(15) . ? 
C7S C9S 1.368(15) 2_745 ? 
C8S C9S 1.371(15) . ? 
C9S C7S 1.368(15) 2_745 ? 
C10S C12S 1.381(16) 2_645 ? 
C10S C11S 1.383(16) . ? 
C11S C12S 1.350(15) . ? 
C12S C10S 1.381(16) 2_645 ? 
  
loop_ 
 _geom_angle_atom_site_label_1 
 _geom_angle_atom_site_label_2 
 _geom_angle_atom_site_label_3 
 _geom_angle 
 _geom_angle_site_symmetry_1 
 _geom_angle_site_symmetry_3 
 _geom_angle_publ_flag 
C11 W1 S4 96.4(2) . . ? 
C11 W1 S3 92.7(3) . . ? 
S4 W1 S3 89.65(8) . . ? 
C11 W1 S1 95.1(3) . . ? 
S4 W1 S1 89.37(8) . . ? 
S3 W1 S1 172.16(8) . . ? 
C11 W1 S2 91.2(2) . . ? 
S4 W1 S2 172.32(8) . . ? 
S3 W1 S2 89.69(8) . . ? 
S1 W1 S2 90.25(8) . . ? 
C11 W1 W2 133.9(3) . . ? 
S4 W1 W2 116.80(6) . . ? 
S3 W1 W2 116.91(6) . . ? 
S1 W1 W2 56.98(6) . . ? 
S2 W1 W2 57.01(6) . . ? 
C11 W1 W3 132.4(2) . 2_756 ? 
S4 W1 W3 116.77(6) . 2_756 ? 
S3 W1 W3 56.92(6) . 2_756 ? 
S1 W1 W3 116.95(6) . 2_756 ? 
S2 W1 W3 56.88(6) . 2_756 ? 
W2 W1 W3 60.040(14) . 2_756 ? 
C11 W1 W3 137.6(3) . . ? 
S4 W1 W3 56.77(6) . . ? 
S3 W1 W3 116.67(6) . . ? 
S1 W1 W3 56.68(6) . . ? 
S2 W1 W3 117.04(6) . . ? 
W2 W1 W3 60.082(13) . . ? 
W3 W1 W3 89.953(15) 2_756 . ? 
C11 W1 W2 135.9(3) . 2_756 ? 
S4 W1 W2 56.85(6) . 2_756 ? 
S3 W1 W2 56.79(6) . 2_756 ? 
S1 W1 W2 116.56(6) . 2_756 ? 
S2 W1 W2 116.80(6) . 2_756 ? 
W2 W1 W2 90.057(16) . 2_756 ? 
W3 W1 W2 59.968(14) 2_756 2_756 ? 
W3 W1 W2 59.922(14) . 2_756 ? 
C21 W2 S3 96.2(2) . 2_756 ? 
C21 W2 S4 97.7(3) . 2_756 ? 
S3 W2 S4 89.32(8) 2_756 2_756 ? 
C21 W2 S1 90.6(3) . . ? 
S3 W2 S1 89.66(8) 2_756 . ? 
S4 W2 S1 171.73(8) 2_756 . ? 
C21 W2 S2 91.9(2) . . ? 
S3 W2 S2 171.98(8) 2_756 . ? 
S4 W2 S2 89.78(8) 2_756 . ? 
S1 W2 S2 90.09(8) . . ? 
C21 W2 W1 131.0(2) . . ? 
S3 W2 W1 116.77(6) 2_756 . ? 
S4 W2 W1 116.63(6) 2_756 . ? 
S1 W2 W1 56.87(6) . . ? 
S2 W2 W1 56.87(6) . . ? 
C21 W2 W3 135.9(2) . 2_756 ? 
S3 W2 W3 116.45(6) 2_756 2_756 ? 
S4 W2 W3 56.68(6) 2_756 2_756 ? 
S1 W2 W3 116.82(6) . 2_756 ? 
S2 W2 W3 56.83(6) . 2_756 ? 
W1 W2 W3 60.020(14) . 2_756 ? 
C21 W2 W3 133.9(2) . . ? 
S3 W2 W3 56.82(6) 2_756 . ? 
S4 W2 W3 116.38(6) 2_756 . ? 
S1 W2 W3 56.62(6) . . ? 
S2 W2 W3 116.82(6) . . ? 
W1 W2 W3 60.003(13) . . ? 
W3 W2 W3 89.896(15) 2_756 . ? 
C21 W2 W1 139.0(2) . 2_756 ? 
S3 W2 W1 56.58(6) 2_756 2_756 ? 
S4 W2 W1 56.55(6) 2_756 2_756 ? 
S1 W2 W1 116.46(6) . 2_756 ? 
S2 W2 W1 116.69(6) . 2_756 ? 
W1 W2 W1 89.943(16) . 2_756 ? 
W3 W2 W1 59.909(14) 2_756 2_756 ? 
W3 W2 W1 59.882(13) . 2_756 ? 
C31 W3 S4 95.5(3) . . ? 
C31 W3 S1 93.0(3) . . ? 
S4 W3 S1 89.51(8) . . ? 
C31 W3 S3 92.6(3) . 2_756 ? 
S4 W3 S3 171.95(8) . 2_756 ? 
S1 W3 S3 89.88(8) . 2_756 ? 
C31 W3 S2 94.4(3) . 2_756 ? 
S4 W3 S2 90.04(8) . 2_756 ? 
S1 W3 S2 172.67(8) . 2_756 ? 
S3 W3 S2 89.54(8) 2_756 2_756 ? 
C31 W3 W1 134.4(2) . 2_756 ? 
S4 W3 W1 116.81(6) . 2_756 ? 
S1 W3 W1 117.09(6) . 2_756 ? 
S3 W3 W1 56.68(6) 2_756 2_756 ? 
S2 W3 W1 56.88(6) 2_756 2_756 ? 
C31 W3 W1 135.5(2) . . ? 
S4 W3 W1 56.72(6) . . ? 
S1 W3 W1 56.95(6) . . ? 
S3 W3 W1 116.65(6) 2_756 . ? 
S2 W3 W1 117.10(6) 2_756 . ? 
W1 W3 W1 90.048(15) 2_756 . ? 
C31 W3 W2 136.5(3) . 2_756 ? 
S4 W3 W2 56.93(6) . 2_756 ? 
S1 W3 W2 117.08(6) . 2_756 ? 
S3 W3 W2 116.56(6) 2_756 2_756 ? 
S2 W3 W2 56.98(6) 2_756 2_756 ? 
W1 W3 W2 59.939(13) 2_756 2_756 ? 
W1 W3 W2 60.171(14) . 2_756 ? 
C31 W3 W2 133.4(3) . . ? 
S4 W3 W2 116.59(6) . . ? 
S1 W3 W2 56.99(6) . . ? 
S3 W3 W2 56.80(6) 2_756 . ? 
S2 W3 W2 116.99(6) 2_756 . ? 
W1 W3 W2 60.151(14) 2_756 . ? 
W1 W3 W2 59.915(13) . . ? 
W2 W3 W2 90.105(15) 2_756 . ? 
W3 S1 W1 66.37(7) . . ? 
W3 S1 W2 66.39(6) . . ? 
W1 S1 W2 66.15(6) . . ? 
W3 S2 W1 66.24(6) 2_756 . ? 
W3 S2 W2 66.19(6) 2_756 . ? 
W1 S2 W2 66.11(6) . . ? 
W1 S3 W2 66.62(6) . 2_756 ? 
W1 S3 W3 66.41(6) . 2_756 ? 
W2 S3 W3 66.38(6) 2_756 2_756 ? 
W1 S4 W3 66.51(6) . . ? 
W1 S4 W2 66.60(6) . 2_756 ? 
W3 S4 W2 66.39(6) . 2_756 ? 
N1 C11 W1 175.3(8) . . ? 
C11 N1 C12 174.5(9) . . ? 
N1 C12 C14 108.2(9) . . ? 
N1 C12 C15 107.3(8) . . ? 
C14 C12 C15 111.6(9) . . ? 
N1 C12 C13 107.8(8) . . ? 
C14 C12 C13 111.8(9) . . ? 
C15 C12 C13 109.8(10) . . ? 
N2 C21 W2 174.4(9) . . ? 
C21 N2 C22 170.3(11) . . ? 
N2 C22 C24 108.4(8) . . ? 
N2 C22 C23 108.2(9) . . ? 
C24 C22 C23 112.5(9) . . ? 
N2 C22 C25 106.4(8) . . ? 
C24 C22 C25 110.5(9) . . ? 
C23 C22 C25 110.6(8) . . ? 
N3 C31 W3 178.3(9) . . ? 
C31 N3 C32 178.6(10) . . ? 
N3 C32 C34 108.5(9) . . ? 
N3 C32 C33 107.5(8) . . ? 
C34 C32 C33 111.6(9) . . ? 
N3 C32 C35 107.5(8) . . ? 
C34 C32 C35 109.7(9) . . ? 
C33 C32 C35 111.9(9) . . ? 
C2S C1S C6S 115.2(18) . . ? 
C3S C2S C1S 127(2) . . ? 
C2S C3S C4S 118.3(17) . . ? 
C5S C4S C3S 114.9(14) . . ? 
C6S C5S C4S 117.9(13) . . ? 
C1S C6S C5S 126.0(16) . . ? 
C8S C7S C9S 119.9(11) . 2_745 ? 
C7S C8S C9S 120.4(11) . . ? 
C7S C9S C8S 119.7(11) 2_745 . ? 
C12S C10S C11S 119.6(12) 2_645 . ? 
C12S C11S C10S 119.5(12) . . ? 
C11S C12S C10S 120.8(12) . 2_645 ? 
  
_diffrn_measured_fraction_theta_max    0.998 
_diffrn_reflns_theta_full              26.39 
_diffrn_measured_fraction_theta_full   0.998 
_refine_diff_density_max    2.277 
_refine_diff_density_min   -2.039 
_refine_diff_density_rms    0.256 

#===END
 
data_morpholine 
  
_audit_creation_method            SHELXL-97 
_chemical_name_systematic 
; 
octakis(mu!3$-sulfido)-hexakis(morpholine) 
-hexa-tungsten-1.3(morpholine)-3.7(aniline) 
; 
_chemical_name_common             'Tungsten sulfide cluster with' 
_chemical_melting_point           ? 
_chemical_formula_moiety          W6S8(C4NOH9)6(C5.2N1.3O1.3H11.7)(C22.2H25.9N3 
_chemical_formula_sum 
 'C51.50 H91.50 N11 O7.25 S8 W6' 
_chemical_formula_weight          2340.44 
  
loop_ 
 _atom_type_symbol 
 _atom_type_description 
 _atom_type_scat_dispersion_real 
 _atom_type_scat_dispersion_imag 
 _atom_type_scat_source 
 'C'  'C'   0.0033   0.0016 
 'International Tables Vol C Tables 4.2.6.8 and 6.1.1.4' 
 'H'  'H'   0.0000   0.0000 
 'International Tables Vol C Tables 4.2.6.8 and 6.1.1.4' 
 'N'  'N'   0.0061   0.0033 
 'International Tables Vol C Tables 4.2.6.8 and 6.1.1.4' 
 'O'  'O'   0.0106   0.0060 
 'International Tables Vol C Tables 4.2.6.8 and 6.1.1.4' 
 'S'  'S'   0.1246   0.1234 
 'International Tables Vol C Tables 4.2.6.8 and 6.1.1.4' 
 'W'  'W'  -0.8490   6.8722 
 'International Tables Vol C Tables 4.2.6.8 and 6.1.1.4' 
  
_symmetry_cell_setting            Monoclinic 
_symmetry_space_group_name_H-M    C2/C 
  
loop_ 
 _symmetry_equiv_pos_as_xyz 
 'x, y, z' 
 '-x, y, -z+1/2' 
 'x+1/2, y+1/2, z' 
 '-x+1/2, y+1/2, -z+1/2' 
 '-x, -y, -z' 
 'x, -y, z-1/2' 
 '-x+1/2, -y+1/2, -z' 
 'x+1/2, -y+1/2, z-1/2' 
  
_cell_length_a                    14.8105(13) 
_cell_length_b                    18.5419(17) 
_cell_length_c                    25.108(2) 
_cell_angle_alpha                 90.00 
_cell_angle_beta                  104.284(2) 
_cell_angle_gamma                 90.00 
_cell_volume                      6681.8(10) 
_cell_formula_units_Z             4 
_cell_measurement_temperature     173(2) 
_cell_measurement_reflns_used     ? 
_cell_measurement_theta_min       ? 
_cell_measurement_theta_max       ? 
  
_exptl_crystal_description        block 
_exptl_crystal_colour             dark-red 
_exptl_crystal_size_max           0.2 
_exptl_crystal_size_mid           0.15 
_exptl_crystal_size_min           0.1 
_exptl_crystal_density_meas       'NOT MEASURED' 
_exptl_crystal_density_diffrn     2.327 
_exptl_crystal_density_method     'not measured' 
_exptl_crystal_F_000              4430 
_exptl_absorpt_coefficient_mu     10.593 
_exptl_absorpt_correction_type    empirical 
_exptl_absorpt_correction_T_min   0.618779 
_exptl_absorpt_correction_T_max   1 
_exptl_absorpt_process_details    ? 
  
_exptl_special_details 
; 
octakis(mu!3$-sulfido)-hexakis(morpholine) 
-hexa-tungsten-1.3(morpholine)-3.7(aniline) 
; 
  
_diffrn_ambient_temperature       173(2) 
_diffrn_radiation_wavelength      0.71073 
_diffrn_radiation_type            MoK\a 
_diffrn_radiation_source          'fine-focus sealed tube' 
_diffrn_radiation_monochromator   graphite 
_diffrn_measurement_device_type   ? 
_diffrn_measurement_method        '\w scans' 
_diffrn_detector_area_resol_mean  ? 
_diffrn_standards_number          ? 
_diffrn_standards_interval_count  ? 
_diffrn_standards_interval_time   ? 
_diffrn_standards_decay_%         0 
_diffrn_reflns_number             40292 
_diffrn_reflns_av_R_equivalents   0.0396 
_diffrn_reflns_av_sigmaI/netI     0.0307 
_diffrn_reflns_limit_h_min        -16 
_diffrn_reflns_limit_h_max        19 
_diffrn_reflns_limit_k_min        -24 
_diffrn_reflns_limit_k_max        24 
_diffrn_reflns_limit_l_min        -33 
_diffrn_reflns_limit_l_max        33 
_diffrn_reflns_theta_min          1.83 
_diffrn_reflns_theta_max          28.28 
_reflns_number_total              8242 
_reflns_number_gt                 7195 
_reflns_threshold_expression      >2sigma(I) 
  
_computing_data_collection        'BRUKER SMART' 
_computing_cell_refinement        'Bruker SAINT' 
_computing_data_reduction         SHELXTL 
_computing_structure_solution     'SHELXS-97 (Sheldrick, 1990)' 
_computing_structure_refinement   'SHELXL-97 (Sheldrick, 1997)' 
_computing_molecular_graphics     SHELXTL 
_computing_publication_material   SHELXTL 
  
_refine_special_details 
; 
 Refinement of F^2^ against ALL reflections.  The weighted R-factor wR and 
 goodness of fit S are based on F^2^, conventional R-factors R are based 
 on F, with F set to zero for negative F^2^. The threshold expression of 
 F^2^ > 2sigma(F^2^) is used only for calculating R-factors(gt) etc. and is 
 not relevant to the choice of reflections for refinement.  R-factors based 
 on F^2^ are statistically about twice as large as those based on F, and R- 
 factors based on ALL data will be even larger. 
; 
  
_refine_ls_structure_factor_coef  Fsqd 
_refine_ls_matrix_type            full 
_refine_ls_weighting_scheme       calc 
_refine_ls_weighting_details 
 'calc w=1/[\s^2^(Fo^2^)+(0.0267P)^2^+0.0000P] where P=(Fo^2^+2Fc^2^)/3' 
_atom_sites_solution_primary      direct 
_atom_sites_solution_secondary    difmap 
_atom_sites_solution_hydrogens    geom 
_refine_ls_hydrogen_treatment     mixed 
_refine_ls_extinction_method      none 
_refine_ls_extinction_coef        ? 
_refine_ls_number_reflns          8242 
_refine_ls_number_parameters      378 
_refine_ls_number_restraints      3 
_refine_ls_R_factor_all           0.0389 
_refine_ls_R_factor_gt            0.0304 
_refine_ls_wR_factor_ref          0.0613 
_refine_ls_wR_factor_gt           0.0595 
_refine_ls_goodness_of_fit_ref    1.216 
_refine_ls_restrained_S_all       1.217 
_refine_ls_shift/su_max           0.112 
_refine_ls_shift/su_mean          0.003 
  
loop_ 
 _atom_site_label 
 _atom_site_type_symbol 
 _atom_site_fract_x 
 _atom_site_fract_y 
 _atom_site_fract_z 
 _atom_site_U_iso_or_equiv 
 _atom_site_adp_type 
 _atom_site_occupancy 
 _atom_site_symmetry_multiplicity 
 _atom_site_calc_flag 
 _atom_site_refinement_flags 
 _atom_site_disorder_assembly 
 _atom_site_disorder_group 
W1 W 0.533581(13) 0.089461(9) -0.024711(7) 0.01360(5) Uani 1 1 d . . . 
W2 W 0.569488(13) -0.048009(9) -0.042656(7) 0.01397(5) Uani 1 1 d . . . 
W3 W 0.393746(13) -0.002500(9) -0.059553(7) 0.01391(5) Uani 1 1 d . . . 
S4 S 0.69323(8) 0.04062(6) -0.00687(5) 0.0178(2) Uani 1 1 d . . . 
S5 S 0.49794(8) 0.03536(6) -0.11713(4) 0.0172(2) Uani 1 1 d . . . 
S6 S 0.36929(9) 0.12401(6) -0.03795(5) 0.0190(2) Uani 1 1 d . . . 
S7 S 0.56496(9) 0.12921(6) 0.07129(4) 0.0186(2) Uani 1 1 d . . . 
N1 N 0.5740(3) 0.1968(2) -0.05888(16) 0.0197(9) Uani 1 1 d . . . 
H1Z H 0.614(3) 0.1878(7) -0.0707(8) 0.024 Uiso 1 1 calc R . . 
C11 C 0.5024(4) 0.2279(3) -0.1049(2) 0.0313(12) Uani 1 1 d . . . 
H11A H 0.4467 0.2405 -0.0917 0.038 Uiso 1 1 calc R . . 
H11B H 0.4836 0.1911 -0.1341 0.038 Uiso 1 1 calc R . . 
C12 C 0.5362(4) 0.2948(3) -0.1292(2) 0.0320(13) Uani 1 1 d . . . 
H12A H 0.5880 0.2815 -0.1458 0.038 Uiso 1 1 calc R . . 
H12B H 0.4848 0.3144 -0.1587 0.038 Uiso 1 1 calc R . . 
C13 C 0.6410(6) 0.3184(3) -0.0464(3) 0.064(2) Uani 1 1 d . . . 
H13A H 0.6648 0.3559 -0.0185 0.077 Uiso 1 1 calc R . . 
H13B H 0.6929 0.3034 -0.0625 0.077 Uiso 1 1 calc R . . 
C14 C 0.6082(5) 0.2545(3) -0.0194(2) 0.0422(16) Uani 1 1 d . . . 
H14A H 0.6604 0.2360 0.0101 0.051 Uiso 1 1 calc R . . 
H14B H 0.5578 0.2698 -0.0023 0.051 Uiso 1 1 calc R . . 
O1 O 0.5668(3) 0.34795(19) -0.08898(17) 0.0454(11) Uani 1 1 d . . . 
N2 N 0.6476(3) -0.1068(2) -0.09875(16) 0.0210(9) Uani 1 1 d . . . 
H2Z H 0.612(3) -0.1166(8) -0.1221(17) 0.025 Uiso 1 1 calc R . . 
C21 C 0.7121(4) -0.0624(3) -0.1222(2) 0.0324(13) Uani 1 1 d . . . 
H21A H 0.7646 -0.0457 -0.0921 0.039 Uiso 1 1 calc R . . 
H21B H 0.6786 -0.0193 -0.1403 0.039 Uiso 1 1 calc R . . 
C22 C 0.7499(5) -0.1048(3) -0.1637(3) 0.0441(16) Uani 1 1 d . . . 
H22A H 0.6979 -0.1181 -0.1952 0.053 Uiso 1 1 calc R . . 
H22B H 0.7939 -0.0743 -0.1776 0.053 Uiso 1 1 calc R . . 
C23 C 0.7320(4) -0.2137(3) -0.1217(2) 0.0344(13) Uani 1 1 d . . . 
H23A H 0.7640 -0.2583 -0.1055 0.041 Uiso 1 1 calc R . . 
H23B H 0.6809 -0.2274 -0.1536 0.041 Uiso 1 1 calc R . . 
C24 C 0.6917(4) -0.1753(3) -0.0792(2) 0.0332(13) Uani 1 1 d . . . 
H24A H 0.6451 -0.2071 -0.0688 0.040 Uiso 1 1 calc R . . 
H24B H 0.7422 -0.1665 -0.0458 0.040 Uiso 1 1 calc R . . 
O2 O 0.7962(3) -0.1683(2) -0.13948(16) 0.0379(10) Uani 1 1 d . . . 
N3 N 0.2604(3) 0.0016(2) -0.13059(16) 0.0223(9) Uani 1 1 d . . . 
H3Z H 0.222(3) 0.0121(8) -0.1177(10) 0.027 Uiso 1 1 calc R . . 
C31 C 0.2613(4) 0.0573(3) -0.1728(2) 0.0317(13) Uani 1 1 d . . . 
H31A H 0.3126 0.0466 -0.1905 0.038 Uiso 1 1 calc R . . 
H31B H 0.2742 0.1048 -0.1546 0.038 Uiso 1 1 calc R . . 
C32 C 0.1711(4) 0.0617(3) -0.2165(2) 0.0392(14) Uani 1 1 d . . . 
H32A H 0.1206 0.0775 -0.1996 0.047 Uiso 1 1 calc R . . 
H32B H 0.1771 0.0980 -0.2443 0.047 Uiso 1 1 calc R . . 
C33 C 0.1405(4) -0.0594(3) -0.2033(2) 0.0402(15) Uani 1 1 d . . . 
H33A H 0.1244 -0.1061 -0.2224 0.048 Uiso 1 1 calc R . . 
H33B H 0.0898 -0.0465 -0.1857 0.048 Uiso 1 1 calc R . . 
C34 C 0.2300(4) -0.0674(3) -0.1599(2) 0.0317(13) Uani 1 1 d . . . 
H34A H 0.2217 -0.1042 -0.1329 0.038 Uiso 1 1 calc R . . 
H34B H 0.2793 -0.0846 -0.1771 0.038 Uiso 1 1 calc R . . 
O3 O 0.1477(3) -0.0056(2) -0.24229(15) 0.0399(10) Uani 1 1 d . . . 
N1S N 0.7491(3) 0.3507(3) 0.10068(17) 0.0366(12) Uani 1 1 d . . . 
H1SA H 0.7789 0.3865 0.0896 0.044 Uiso 1 1 calc R . . 
H1SB H 0.7032 0.3290 0.0773 0.044 Uiso 1 1 calc R . . 
C11S C 0.7746(4) 0.3286(3) 0.1551(2) 0.0252(11) Uani 1 1 d . . . 
C12S C 0.7330(4) 0.2687(3) 0.1722(2) 0.0271(11) Uani 1 1 d . . . 
H12C H 0.6852 0.2438 0.1466 0.033 Uiso 1 1 calc R . . 
C13S C 0.7603(4) 0.2451(3) 0.2254(2) 0.0293(12) Uani 1 1 d . . . 
H13C H 0.7301 0.2047 0.2366 0.035 Uiso 1 1 calc R . . 
C14S C 0.8311(4) 0.2792(3) 0.2628(2) 0.0297(12) Uani 1 1 d . . . 
H14C H 0.8500 0.2626 0.2997 0.036 Uiso 1 1 calc R . . 
C15S C 0.8741(4) 0.3380(3) 0.2461(2) 0.0326(13) Uani 1 1 d . . . 
H15A H 0.9229 0.3619 0.2716 0.039 Uiso 1 1 calc R . . 
C16S C 0.8468(4) 0.3622(3) 0.1926(2) 0.0299(12) Uani 1 1 d . . . 
H16A H 0.8777 0.4022 0.1814 0.036 Uiso 1 1 calc R . . 
N2S N 0.5000 -0.0238(4) -0.2500 0.060(3) Uani 1 2 d S . . 
H2SA H 0.4811 0.0000 -0.2244 0.073 Uiso 0.50 1 calc PR . . 
H2SB H 0.5189 0.0000 -0.2756 0.073 Uiso 0.50 1 calc PR . . 
C21S C 0.5000 -0.0964(5) -0.2500 0.0313(18) Uani 1 2 d S . . 
C22S C 0.4705(4) -0.1350(3) -0.2098(2) 0.0328(13) Uani 1 1 d . . . 
H22C H 0.4492 -0.1099 -0.1823 0.039 Uiso 1 1 calc R . . 
C23S C 0.4719(4) -0.2084(4) -0.2098(2) 0.0424(15) Uani 1 1 d . . . 
H23C H 0.4531 -0.2340 -0.1816 0.051 Uiso 1 1 calc R . . 
C24S C 0.5000 -0.2458(5) -0.2500 0.050(2) Uani 1 2 d S . . 
H24C H 0.5000 -0.2971 -0.2500 0.060 Uiso 1 2 calc SR . . 
O3S O 0.0815(6) 0.0194(4) -0.0791(4) 0.062(3) Uiso 0.646(11) 1 d PD A 1 
N3S N -0.0359(6) 0.1388(5) -0.0911(3) 0.045(2) Uiso 0.646(11) 1 d PD A 1 
H3SA H -0.0805 0.1628 -0.0814 0.054 Uiso 0.646(11) 1 calc PR A 1 
C31S C 0.1040(13) 0.0771(8) -0.0392(7) 0.051(4) Uiso 0.646(11) 1 d PD A 1 
H31C H 0.1724 0.0812 -0.0250 0.062 Uiso 0.646(11) 1 calc PR A 1 
H31D H 0.0763 0.0673 -0.0078 0.062 Uiso 0.646(11) 1 calc PR A 1 
C32S C 0.0638(10) 0.1482(8) -0.0683(7) 0.079(5) Uiso 0.646(11) 1 d PD A 1 
H32C H 0.0750 0.1885 -0.0416 0.095 Uiso 0.646(11) 1 calc PR A 1 
H32D H 0.0947 0.1597 -0.0979 0.095 Uiso 0.646(11) 1 calc PR A 1 
C33S C -0.0485(9) 0.0852(7) -0.1311(5) 0.059(3) Uiso 0.646(11) 1 d PD A 1 
H33C H -0.0135 0.0975 -0.1588 0.070 Uiso 0.646(11) 1 calc PR A 1 
H33C H -0.1153 0.0811 -0.1501 0.070 Uiso 0.646(11) 1 calc PR A 1 
C34S C -0.0143(10) 0.0160(8) -0.1042(7) 0.060(4) Uiso 0.646(11) 1 d PD A 1 
H34C H -0.0489 0.0046 -0.0762 0.072 Uiso 0.646(11) 1 calc PR A 1 
H34D H -0.0262 -0.0231 -0.1319 0.072 Uiso 0.646(11) 1 calc PR A 1 
N3T N -0.0558(14) -0.0167(10) -0.1334(8) 0.067(6) Uiso 0.354(11) 1 d P A 2 
H3TA H -0.1012 -0.0121 -0.1633 0.080 Uiso 0.354(11) 1 calc PR A 2 
H3TB H -0.0390 -0.0598 -0.1198 0.080 Uiso 0.354(11) 1 calc PR A 2 
C31T C -0.0134(15) 0.0403(12) -0.1092(9) 0.038(5) Uiso 0.354(11) 1 d P A 2 
C32T C 0.0522(19) 0.0279(15) -0.0517(12) 0.076(8) Uiso 0.354(11) 1 d P A 2 
H32E H 0.0610 -0.0187 -0.0356 0.091 Uiso 0.354(11) 1 calc PR A 2 
C33T C 0.092(3) 0.080(2) -0.0282(18) 0.096(14) Uiso 0.354(11) 1 d P A 2 
H33D H 0.1392 0.0710 0.0042 0.115 Uiso 0.354(11) 1 calc PR A 2 
C34T C 0.0763(16) 0.1496(13) -0.0425(10) 0.052(6) Uiso 0.354(11) 1 d P A 2 
H34E H 0.1089 0.1871 -0.0200 0.063 Uiso 0.354(11) 1 calc PR A 2 
C35T C 0.0138(15) 0.1645(11) -0.0896(7) 0.041(5) Uiso 0.354(11) 1 d P A 2 
H35A H -0.0009 0.2137 -0.0981 0.049 Uiso 0.354(11) 1 calc PR A 2 
C36T C -0.0252(14) 0.1195(11) -0.1218(9) 0.046(5) Uiso 0.354(11) 1 d P A 2 
H36A H -0.0643 0.1344 -0.1559 0.055 Uiso 0.354(11) 1 calc PR A 2 
  
loop_ 
 _atom_site_aniso_label 
 _atom_site_aniso_U_11 
 _atom_site_aniso_U_22 
 _atom_site_aniso_U_33 
 _atom_site_aniso_U_23 
 _atom_site_aniso_U_13 
 _atom_site_aniso_U_12 
W1 0.01935(10) 0.01069(9) 0.01164(9) 0.00080(6) 0.00549(7) -0.00171(7) 
W2 0.01937(10) 0.01191(9) 0.01210(9) -0.00017(6) 0.00667(7) -0.00027(7) 
W3 0.01873(10) 0.01261(9) 0.01101(9) 0.00076(6) 0.00482(7) -0.00154(7) 
S4 0.0196(6) 0.0182(6) 0.0170(5) 0.0022(4) 0.0072(5) -0.0022(5) 
S5 0.0242(6) 0.0167(6) 0.0125(5) 0.0011(4) 0.0079(5) -0.0015(5) 
S6 0.0241(7) 0.0155(6) 0.0182(6) 0.0019(4) 0.0065(5) 0.0010(5) 
S7 0.0264(7) 0.0141(5) 0.0160(5) -0.0024(4) 0.0065(5) -0.0036(5) 
N1 0.022(2) 0.014(2) 0.023(2) 0.0002(16) 0.0048(17) -0.0035(16) 
C11 0.033(3) 0.025(3) 0.030(3) 0.013(2) -0.003(2) -0.005(2) 
C12 0.035(3) 0.024(3) 0.033(3) 0.013(2) -0.001(2) -0.003(2) 
C13 0.094(6) 0.033(4) 0.042(4) 0.012(3) -0.023(4) -0.037(4) 
C14 0.071(5) 0.023(3) 0.022(3) 0.004(2) -0.010(3) -0.017(3) 
O1 0.071(3) 0.0130(19) 0.046(3) 0.0048(17) 0.003(2) -0.005(2) 
N2 0.021(2) 0.026(2) 0.016(2) -0.0052(16) 0.0064(17) 0.0012(18) 
C21 0.044(4) 0.028(3) 0.036(3) 0.001(2) 0.029(3) 0.003(3) 
C22 0.062(5) 0.037(3) 0.044(4) 0.000(3) 0.034(3) 0.014(3) 
C23 0.042(4) 0.024(3) 0.041(3) -0.002(2) 0.016(3) 0.011(3) 
C24 0.047(4) 0.018(3) 0.040(3) 0.004(2) 0.021(3) 0.012(2) 
O2 0.030(2) 0.046(2) 0.041(2) -0.0093(19) 0.0154(18) 0.0080(19) 
N3 0.023(2) 0.025(2) 0.018(2) 0.0025(17) 0.0051(17) 0.0004(18) 
C31 0.038(3) 0.027(3) 0.028(3) 0.013(2) 0.003(2) -0.007(2) 
C32 0.035(4) 0.043(4) 0.034(3) 0.008(3) -0.003(3) 0.002(3) 
C33 0.043(4) 0.042(4) 0.028(3) -0.002(3) -0.008(3) -0.011(3) 
C34 0.033(3) 0.029(3) 0.026(3) -0.003(2) -0.005(2) -0.010(2) 
O3 0.045(3) 0.046(3) 0.021(2) -0.0019(18) -0.0060(18) -0.004(2) 
N1S 0.048(3) 0.042(3) 0.022(2) 0.008(2) 0.014(2) -0.001(2) 
C11S 0.029(3) 0.029(3) 0.022(3) 0.003(2) 0.014(2) 0.002(2) 
C12S 0.028(3) 0.031(3) 0.023(3) 0.000(2) 0.007(2) -0.007(2) 
C13S 0.031(3) 0.030(3) 0.027(3) 0.006(2) 0.007(2) -0.007(2) 
C14S 0.029(3) 0.042(3) 0.017(2) 0.003(2) 0.003(2) -0.005(3) 
C15S 0.026(3) 0.039(3) 0.034(3) -0.003(2) 0.009(2) -0.004(2) 
C16S 0.031(3) 0.026(3) 0.037(3) 0.004(2) 0.017(2) -0.005(2) 
N2S 0.114(8) 0.044(5) 0.029(4) 0.000 0.029(5) 0.000 
C21S 0.026(4) 0.047(5) 0.015(3) 0.000 -0.004(3) 0.000 
C22S 0.023(3) 0.054(4) 0.021(3) -0.004(3) 0.005(2) 0.000(3) 
C23S 0.032(3) 0.061(4) 0.036(3) 0.009(3) 0.010(3) -0.006(3) 
C24S 0.044(6) 0.042(5) 0.063(6) 0.000 0.013(5) 0.000 
  
_geom_special_details 
; 
 All esds (except the esd in the dihedral angle between two l.s. planes) 
 are estimated using the full covariance matrix.  The cell esds are taken 
 into account individually in the estimation of esds in distances, angles 
 and torsion angles; correlations between esds in cell parameters are only 
 used when they are defined by crystal symmetry.  An approximate (isotropic) 
 treatment of cell esds is used for estimating esds involving l.s. planes. 
; 
  
loop_ 
 _geom_bond_atom_site_label_1 
 _geom_bond_atom_site_label_2 
 _geom_bond_distance 
 _geom_bond_site_symmetry_2 
 _geom_bond_publ_flag 
W1 N1 2.303(4) . ? 
W1 S7 2.4527(11) . ? 
W1 S6 2.4582(12) . ? 
W1 S5 2.4627(11) . ? 
W1 S4 2.4676(12) . ? 
W1 W2 2.6563(3) 5_655 ? 
W1 W3 2.6586(3) . ? 
W1 W2 2.6648(3) . ? 
W1 W3 2.6666(3) 5_655 ? 
W2 N2 2.305(4) . ? 
W2 S6 2.4493(11) 5_655 ? 
W2 S5 2.4558(11) . ? 
W2 S7 2.4583(12) 5_655 ? 
W2 S4 2.4605(12) . ? 
W2 W1 2.6564(3) 5_655 ? 
W2 W3 2.6589(3) 5_655 ? 
W2 W3 2.6687(3) . ? 
W3 N3 2.313(4) . ? 
W3 S4 2.4495(11) 5_655 ? 
W3 S6 2.4546(12) . ? 
W3 S5 2.4627(10) . ? 
W3 S7 2.4638(12) 5_655 ? 
W3 W2 2.6589(3) 5_655 ? 
W3 W1 2.6667(3) 5_655 ? 
S4 W3 2.4495(11) 5_655 ? 
S6 W2 2.4493(11) 5_655 ? 
S7 W2 2.4582(12) 5_655 ? 
S7 W3 2.4637(12) 5_655 ? 
N1 C14 1.462(6) . ? 
N1 C11 1.480(6) . ? 
C11 C12 1.521(6) . ? 
C12 O1 1.405(6) . ? 
C13 O1 1.439(8) . ? 
C13 C14 1.505(8) . ? 
N2 C24 1.456(6) . ? 
N2 C21 1.489(6) . ? 
C21 C22 1.518(7) . ? 
C22 O2 1.422(7) . ? 
C23 O2 1.422(7) . ? 
C23 C24 1.523(7) . ? 
N3 C31 1.483(6) . ? 
N3 C34 1.488(6) . ? 
C31 C32 1.507(7) . ? 
C32 O3 1.409(7) . ? 
C33 O3 1.421(7) . ? 
C33 C34 1.502(7) . ? 
N1S C11S 1.387(6) . ? 
C11S C16S 1.386(7) . ? 
C11S C12S 1.388(7) . ? 
C12S C13S 1.369(7) . ? 
C13S C14S 1.378(7) . ? 
C14S C15S 1.378(7) . ? 
C15S C16S 1.378(7) . ? 
N2S C21S 1.347(10) . ? 
C21S C22S 1.393(7) . ? 
C21S C22S 1.393(7) 2_654 ? 
C22S C23S 1.361(8) . ? 
C23S C24S 1.372(7) . ? 
C24S C23S 1.372(7) 2_654 ? 
O3S C34S 1.405(15) . ? 
O3S C31S 1.447(16) . ? 
N3S C33S 1.392(13) . ? 
N3S C32S 1.457(16) . ? 
C31S C32S 1.552(19) . ? 
C33S C34S 1.480(16) . ? 
N3T C31T 1.30(3) . ? 
C31T C36T 1.50(3) . ? 
C31T C32T 1.55(3) . ? 
C32T C33T 1.21(5) . ? 
C33T C34T 1.34(4) . ? 
C34T C35T 1.34(3) . ? 
C35T C36T 1.21(3) . ? 
  
loop_ 
 _geom_angle_atom_site_label_1 
 _geom_angle_atom_site_label_2 
 _geom_angle_atom_site_label_3 
 _geom_angle 
 _geom_angle_site_symmetry_1 
 _geom_angle_site_symmetry_3 
 _geom_angle_publ_flag 
N1 W1 S7 95.90(10) . . ? 
N1 W1 S6 93.67(11) . . ? 
S7 W1 S6 89.76(4) . . ? 
N1 W1 S5 90.91(10) . . ? 
S7 W1 S5 173.18(4) . . ? 
S6 W1 S5 90.22(4) . . ? 
N1 W1 S4 93.40(11) . . ? 
S7 W1 S4 89.49(4) . . ? 
S6 W1 S4 172.93(4) . . ? 
S5 W1 S4 89.69(4) . . ? 
N1 W1 W2 136.89(10) . 5_655 ? 
S7 W1 W2 57.35(3) . 5_655 ? 
S6 W1 W2 57.07(3) . 5_655 ? 
S5 W1 W2 117.31(3) . 5_655 ? 
S4 W1 W2 116.98(3) . 5_655 ? 
N1 W1 W3 133.18(10) . . ? 
S7 W1 W3 117.35(3) . . ? 
S6 W1 W3 57.17(3) . . ? 
S5 W1 W3 57.33(3) . . ? 
S4 W1 W3 117.27(3) . . ? 
W2 W1 W3 60.036(8) 5_655 . ? 
N1 W1 W2 133.01(10) . . ? 
S7 W1 W2 117.15(3) . . ? 
S6 W1 W2 117.30(3) . . ? 
S5 W1 W2 57.07(3) . . ? 
S4 W1 W2 57.14(3) . . ? 
W2 W1 W2 90.052(8) 5_655 . ? 
W3 W1 W2 60.174(8) . . ? 
N1 W1 W3 136.61(10) . 5_655 ? 
S7 W1 W3 57.35(3) . 5_655 ? 
S6 W1 W3 117.21(3) . 5_655 ? 
S5 W1 W3 116.87(3) . 5_655 ? 
S4 W1 W3 56.83(2) . 5_655 ? 
W2 W1 W3 60.179(8) 5_655 5_655 ? 
W3 W1 W3 90.139(10) . 5_655 ? 
W2 W1 W3 59.831(8) . 5_655 ? 
N2 W2 S6 95.37(10) . 5_655 ? 
N2 W2 S5 91.13(10) . . ? 
S6 W2 S5 173.50(4) 5_655 . ? 
N2 W2 S7 91.37(11) . 5_655 ? 
S6 W2 S7 89.84(4) 5_655 5_655 ? 
S5 W2 S7 89.81(4) . 5_655 ? 
N2 W2 S4 95.64(11) . . ? 
S6 W2 S4 89.54(4) 5_655 . ? 
S5 W2 S4 90.01(4) . . ? 
S7 W2 S4 172.99(4) 5_655 . ? 
N2 W2 W1 134.91(10) . 5_655 ? 
S6 W2 W1 57.39(3) 5_655 5_655 ? 
S5 W2 W1 117.33(3) . 5_655 ? 
S7 W2 W1 57.16(3) 5_655 5_655 ? 
S4 W2 W1 117.00(3) . 5_655 ? 
N2 W2 W3 137.92(11) . 5_655 ? 
S6 W2 W3 57.26(3) 5_655 5_655 ? 
S5 W2 W3 117.41(3) . 5_655 ? 
S7 W2 W3 117.14(3) 5_655 5_655 ? 
S4 W2 W3 57.01(2) . 5_655 ? 
W1 W2 W3 60.025(8) 5_655 5_655 ? 
N2 W2 W1 134.98(10) . . ? 
S6 W2 W1 117.34(3) 5_655 . ? 
S5 W2 W1 57.32(3) . . ? 
S7 W2 W1 117.02(3) 5_655 . ? 
S4 W2 W1 57.39(3) . . ? 
W1 W2 W1 89.949(8) 5_655 . ? 
W3 W2 W1 60.119(6) 5_655 . ? 
N2 W2 W3 131.99(11) . . ? 
S6 W2 W3 117.45(3) 5_655 . ? 
S5 W2 W3 57.26(3) . . ? 
S7 W2 W3 57.27(3) 5_655 . ? 
S4 W2 W3 117.15(3) . . ? 
W1 W2 W3 60.102(8) 5_655 . ? 
W3 W2 W3 90.087(8) 5_655 . ? 
W1 W2 W3 59.797(7) . . ? 
N3 W3 S4 92.41(10) . 5_655 ? 
N3 W3 S6 89.69(10) . . ? 
S4 W3 S6 89.67(4) 5_655 . ? 
N3 W3 S5 94.45(10) . . ? 
S4 W3 S5 173.14(4) 5_655 . ? 
S6 W3 S5 90.30(4) . . ? 
N3 W3 S7 97.40(10) . 5_655 ? 
S4 W3 S7 89.65(4) 5_655 5_655 ? 
S6 W3 S7 172.89(4) . 5_655 ? 
S5 W3 S7 89.52(4) . 5_655 ? 
N3 W3 W1 132.88(10) . . ? 
S4 W3 W1 117.31(3) 5_655 . ? 
S6 W3 W1 57.30(3) . . ? 
S5 W3 W1 57.33(3) . . ? 
S7 W3 W1 117.05(3) 5_655 . ? 
N3 W3 W2 131.71(10) . 5_655 ? 
S4 W3 W2 57.41(3) 5_655 5_655 ? 
S6 W3 W2 57.07(3) . 5_655 ? 
S5 W3 W2 117.22(3) . 5_655 ? 
S7 W3 W2 116.97(3) 5_655 5_655 ? 
W1 W3 W2 59.940(7) . 5_655 ? 
N3 W3 W1 137.08(10) . 5_655 ? 
S4 W3 W1 57.48(3) 5_655 5_655 ? 
S6 W3 W1 117.08(3) . 5_655 ? 
S5 W3 W1 116.70(3) . 5_655 ? 
S7 W3 W1 56.96(3) 5_655 5_655 ? 
W1 W3 W1 89.862(9) . 5_655 ? 
W2 W3 W1 60.051(8) 5_655 5_655 ? 
N3 W3 W2 138.31(10) . . ? 
S4 W3 W2 117.17(3) 5_655 . ? 
S6 W3 W2 117.28(3) . . ? 
S5 W3 W2 57.02(3) . . ? 
S7 W3 W2 57.07(3) 5_655 . ? 
W1 W3 W2 60.029(9) . . ? 
W2 W3 W2 89.913(8) 5_655 . ? 
W1 W3 W2 59.720(7) 5_655 . ? 
W3 S4 W2 65.57(3) 5_655 . ? 
W3 S4 W1 65.68(3) 5_655 . ? 
W2 S4 W1 65.47(3) . . ? 
W2 S5 W3 65.72(3) . . ? 
W2 S5 W1 65.61(3) . . ? 
W3 S5 W1 65.34(3) . . ? 
W2 S6 W3 65.67(3) 5_655 . ? 
W2 S6 W1 65.54(3) 5_655 . ? 
W3 S6 W1 65.52(3) . . ? 
W1 S7 W2 65.49(3) . 5_655 ? 
W1 S7 W3 65.69(3) . 5_655 ? 
W2 S7 W3 65.67(3) 5_655 5_655 ? 
C14 N1 C11 107.9(4) . . ? 
C14 N1 W1 117.3(3) . . ? 
C11 N1 W1 115.2(3) . . ? 
N1 C11 C12 112.8(4) . . ? 
O1 C12 C11 111.3(4) . . ? 
O1 C13 C14 111.3(6) . . ? 
N1 C14 C13 111.5(5) . . ? 
C12 O1 C13 108.6(4) . . ? 
C24 N2 C21 109.8(4) . . ? 
C24 N2 W2 117.2(3) . . ? 
C21 N2 W2 116.6(3) . . ? 
N2 C21 C22 111.4(4) . . ? 
O2 C22 C21 111.0(5) . . ? 
O2 C23 C24 110.6(4) . . ? 
N2 C24 C23 113.1(4) . . ? 
C22 O2 C23 109.5(4) . . ? 
C31 N3 C34 107.5(4) . . ? 
C31 N3 W3 114.7(3) . . ? 
C34 N3 W3 116.7(3) . . ? 
N3 C31 C32 113.3(5) . . ? 
O3 C32 C31 111.1(5) . . ? 
O3 C33 C34 111.5(5) . . ? 
N3 C34 C33 112.3(5) . . ? 
C32 O3 C33 110.9(4) . . ? 
C16S C11S N1S 120.8(5) . . ? 
C16S C11S C12S 118.5(5) . . ? 
N1S C11S C12S 120.5(5) . . ? 
C13S C12S C11S 120.7(5) . . ? 
C12S C13S C14S 120.7(5) . . ? 
C15S C14S C13S 119.1(5) . . ? 
C16S C15S C14S 120.6(5) . . ? 
C15S C16S C11S 120.4(5) . . ? 
N2S C21S C22S 121.0(4) . . ? 
N2S C21S C22S 121.0(4) . 2_654 ? 
C22S C21S C22S 118.1(8) . 2_654 ? 
C23S C22S C21S 120.5(5) . . ? 
C22S C23S C24S 120.9(6) . . ? 
C23S C24S C23S 119.2(9) . 2_654 ? 
C34S O3S C31S 112.2(11) . . ? 
C33S N3S C32S 108.2(11) . . ? 
O3S C31S C32S 107.8(12) . . ? 
N3S C32S C31S 108.6(12) . . ? 
N3S C33S C34S 108.6(11) . . ? 
O3S C34S C33S 111.1(11) . . ? 
N3T C31T C36T 133(2) . . ? 
N3T C31T C32T 116(2) . . ? 
C36T C31T C32T 110.9(19) . . ? 
C33T C32T C31T 117(3) . . ? 
C32T C33T C34T 127(4) . . ? 
C35T C34T C33T 118(3) . . ? 
C36T C35T C34T 124(2) . . ? 
C35T C36T C31T 122(2) . . ? 
  
_diffrn_measured_fraction_theta_max    0.993 
_diffrn_reflns_theta_full              28.28 
_diffrn_measured_fraction_theta_full   0.993 
_refine_diff_density_max    1.472 
_refine_diff_density_min   -1.393 
_refine_diff_density_rms    0.179 

#===END
 
data_again 
  
_audit_creation_method            SHELXL-97 
_chemical_name_systematic 
; 
octakis(mu!3$-sulfido)-hexakis(methylamine) 
-hexa-tungsten 
; 
_chemical_name_common             'Tungsten sulfide cluster with' 
_chemical_melting_point           ? 
_chemical_formula_moiety          'W6 S8 (CH5N)6' 
_chemical_formula_sum 
 'C6 H30 N6 S8 W6' 
_chemical_formula_weight          1545.94 
  
loop_ 
 _atom_type_symbol 
 _atom_type_description 
 _atom_type_scat_dispersion_real 
 _atom_type_scat_dispersion_imag 
 _atom_type_scat_source 
 'C'  'C'   0.0033   0.0016 
 'International Tables Vol C Tables 4.2.6.8 and 6.1.1.4' 
 'H'  'H'   0.0000   0.0000 
 'International Tables Vol C Tables 4.2.6.8 and 6.1.1.4' 
 'N'  'N'   0.0061   0.0033 
 'International Tables Vol C Tables 4.2.6.8 and 6.1.1.4' 
 'S'  'S'   0.1246   0.1234 
 'International Tables Vol C Tables 4.2.6.8 and 6.1.1.4' 
 'W'  'W'  -0.8490   6.8722 
 'International Tables Vol C Tables 4.2.6.8 and 6.1.1.4' 
  
_symmetry_cell_setting            Triclinic 
_symmetry_space_group_name_H-M    P-1 
  
loop_ 
 _symmetry_equiv_pos_as_xyz 
 'x, y, z' 
 '-x, -y, -z' 
  
_cell_length_a                    9.0847(5) 
_cell_length_b                    9.1602(5) 
_cell_length_c                    9.5660(5) 
_cell_angle_alpha                 103.7320(10) 
_cell_angle_beta                  116.6220(10) 
_cell_angle_gamma                 106.2650(10) 
_cell_volume                      619.10(6) 
_cell_formula_units_Z             1 
_cell_measurement_temperature     173(2) 
_cell_measurement_reflns_used     ? 
_cell_measurement_theta_min       ? 
_cell_measurement_theta_max       ? 
  
_exptl_crystal_description        plate 
_exptl_crystal_colour             black 
_exptl_crystal_size_max           0.4 
_exptl_crystal_size_mid           0.2 
_exptl_crystal_size_min           0.1 
_exptl_crystal_density_meas       'NOT MEASURED' 
_exptl_crystal_density_diffrn     4.147 
_exptl_crystal_density_method     'not measured' 
_exptl_crystal_F_000              680 
_exptl_absorpt_coefficient_mu     28.438 
_exptl_absorpt_correction_type    empirical 
_exptl_absorpt_correction_T_min   0.074905 
_exptl_absorpt_correction_T_max   1 
_exptl_absorpt_process_details    ? 
  
_exptl_special_details 
; 
octakis(mu!3$-sulfido)-hexakis(methylamine) 
-hexa-tungsten 
; 
  
_diffrn_ambient_temperature       173(2) 
_diffrn_radiation_wavelength      0.71073 
_diffrn_radiation_type            MoK\a 
_diffrn_radiation_source          'fine-focus sealed tube' 
_diffrn_radiation_monochromator   graphite 
_diffrn_measurement_device_type   ? 
_diffrn_measurement_method        '\w scans' 
_diffrn_detector_area_resol_mean  ? 
_diffrn_standards_number          ? 
_diffrn_standards_interval_count  ? 
_diffrn_standards_interval_time   ? 
_diffrn_standards_decay_%         0 
_diffrn_reflns_number             4234 
_diffrn_reflns_av_R_equivalents   0.0331 
_diffrn_reflns_av_sigmaI/netI     0.0392 
_diffrn_reflns_limit_h_min        -10 
_diffrn_reflns_limit_h_max        10 
_diffrn_reflns_limit_k_min        -10 
_diffrn_reflns_limit_k_max        10 
_diffrn_reflns_limit_l_min        -11 
_diffrn_reflns_limit_l_max        11 
_diffrn_reflns_theta_min          2.56 
_diffrn_reflns_theta_max          24.71 
_reflns_number_total              1987 
_reflns_number_gt                 1789 
_reflns_threshold_expression      >2sigma(I) 
  
_computing_data_collection        'BRUKER SMART' 
_computing_cell_refinement        'Bruker SAINT' 
_computing_data_reduction         SHELXTL 
_computing_structure_solution     'SHELXS-97 (Sheldrick, 1990)' 
_computing_structure_refinement   'SHELXL-97 (Sheldrick, 1997)' 
_computing_molecular_graphics     SHELXTL 
_computing_publication_material   SHELXTL 
  
_refine_special_details 
; 
 Refinement of F^2^ against ALL reflections.  The weighted R-factor wR and 
 goodness of fit S are based on F^2^, conventional R-factors R are based 
 on F, with F set to zero for negative F^2^. The threshold expression of 
 F^2^ > 2sigma(F^2^) is used only for calculating R-factors(gt) etc. and is 
 not relevant to the choice of reflections for refinement.  R-factors based 
 on F^2^ are statistically about twice as large as those based on F, and R- 
 factors based on ALL data will be even larger. 
; 
  
_refine_ls_structure_factor_coef  Fsqd 
_refine_ls_matrix_type            full 
_refine_ls_weighting_scheme       calc 
_refine_ls_weighting_details 
 'calc w=1/[\s^2^(Fo^2^)+(0.0900P)^2^+0.0000P] where P=(Fo^2^+2Fc^2^)/3' 
_atom_sites_solution_primary      direct 
_atom_sites_solution_secondary    difmap 
_atom_sites_solution_hydrogens    geom 
_refine_ls_hydrogen_treatment     mixed 
_refine_ls_extinction_method      none 
_refine_ls_extinction_coef        ? 
_refine_ls_number_reflns          1987 
_refine_ls_number_parameters      121 
_refine_ls_number_restraints      0 
_refine_ls_R_factor_all           0.0470 
_refine_ls_R_factor_gt            0.0444 
_refine_ls_wR_factor_ref          0.1239 
_refine_ls_wR_factor_gt           0.1222 
_refine_ls_goodness_of_fit_ref    1.097 
_refine_ls_restrained_S_all       1.097 
_refine_ls_shift/su_max           0.006 
_refine_ls_shift/su_mean          0.000 
  
loop_ 
 _atom_site_label 
 _atom_site_type_symbol 
 _atom_site_fract_x 
 _atom_site_fract_y 
 _atom_site_fract_z 
 _atom_site_U_iso_or_equiv 
 _atom_site_adp_type 
 _atom_site_occupancy 
 _atom_site_symmetry_multiplicity 
 _atom_site_calc_flag 
 _atom_site_refinement_flags 
 _atom_site_disorder_assembly 
 _atom_site_disorder_group 
W1 W 0.97011(6) 0.77966(6) 0.41202(6) 0.0086(2) Uani 1 1 d . . . 
W2 W 0.89130(6) 0.98906(6) 0.27547(6) 0.0086(2) Uani 1 1 d . . . 
W3 W 0.76642(6) 0.91450(6) 0.46528(6) 0.0085(2) Uani 1 1 d . . . 
S5 S 0.7108(4) 1.1175(4) 0.3413(4) 0.0137(7) Uani 1 1 d . . . 
S4 S 0.6591(4) 0.7105(4) 0.1837(4) 0.0163(7) Uani 1 1 d . . . 
S6 S 1.0930(4) 0.8690(4) 0.2456(4) 0.0127(7) Uani 1 1 d . . . 
S7 S 0.8608(4) 0.7279(4) 0.5959(4) 0.0147(7) Uani 1 1 d . . . 
N1 N 0.9158(14) 0.5077(13) 0.2976(13) 0.020(2) Uani 1 1 d . . . 
H1A H 1.009(10) 0.5026(14) 0.350(6) 0.025 Uiso 1 1 calc R . . 
H1B H 0.846(8) 0.454(6) 0.315(2) 0.025 Uiso 1 1 calc R . . 
N2 N 0.7514(13) 0.9588(13) -0.0043(12) 0.016(2) Uani 1 1 d . . . 
H2A H 0.671(9) 0.981(3) -0.025(3) 0.019 Uiso 1 1 calc R . . 
H2B H 0.820(8) 1.022(7) -0.0109(14) 0.019 Uiso 1 1 calc R . . 
N3 N 0.4802(13) 0.8050(13) 0.4117(12) 0.016(2) Uani 1 1 d . . . 
H3A H 0.4877(14) 0.851(5) 0.503(9) 0.019 Uiso 1 1 calc R . . 
H3B H 0.416(7) 0.834(3) 0.339(7) 0.019 Uiso 1 1 calc R . . 
C1 C 0.8424(17) 0.4249(16) 0.1118(14) 0.020(3) Uani 1 1 d . . . 
H1B H 0.8249 0.3086 0.0814 0.030 Uiso 1 1 calc R . . 
H1C H 0.9296 0.4852 0.0880 0.030 Uiso 1 1 calc R . . 
H1D H 0.7243 0.4259 0.0432 0.030 Uiso 1 1 calc R . . 
C2 C 0.6814(18) 0.7909(19) -0.1366(15) 0.030(4) Uani 1 1 d . . . 
H2B H 0.6252 0.7916 -0.2509 0.045 Uiso 1 1 calc R . . 
H2C H 0.5892 0.7079 -0.1332 0.045 Uiso 1 1 calc R . . 
H2D H 0.7833 0.7618 -0.1137 0.045 Uiso 1 1 calc R . . 
C3 C 0.3792(17) 0.6218(17) 0.3483(17) 0.025(3) Uani 1 1 d . . . 
H3B H 0.2586 0.5943 0.3317 0.037 Uiso 1 1 calc R . . 
H3C H 0.4492 0.5851 0.4329 0.037 Uiso 1 1 calc R . . 
H3D H 0.3629 0.5645 0.2382 0.037 Uiso 1 1 calc R . . 
  
loop_ 
 _atom_site_aniso_label 
 _atom_site_aniso_U_11 
 _atom_site_aniso_U_22 
 _atom_site_aniso_U_33 
 _atom_site_aniso_U_23 
 _atom_site_aniso_U_13 
 _atom_site_aniso_U_12 
W1 0.0055(3) 0.0094(4) 0.0077(3) 0.0008(2) 0.0036(2) 0.0016(2) 
W2 0.0050(3) 0.0118(4) 0.0062(3) 0.0019(2) 0.0031(2) 0.0021(3) 
W3 0.0035(3) 0.0109(4) 0.0083(3) 0.0020(2) 0.0035(2) 0.0013(2) 
S5 0.0094(14) 0.0211(17) 0.0149(15) 0.0087(13) 0.0079(12) 0.0091(13) 
S4 0.0082(14) 0.0145(17) 0.0105(15) -0.0033(13) 0.0009(12) 0.0000(13) 
S6 0.0091(14) 0.0173(16) 0.0113(14) 0.0031(13) 0.0069(12) 0.0055(13) 
S7 0.0137(15) 0.0171(17) 0.0167(15) 0.0094(14) 0.0100(13) 0.0063(14) 
N1 0.014(5) 0.013(6) 0.021(6) -0.002(5) 0.009(5) 0.000(5) 
N2 0.017(5) 0.020(6) 0.014(5) 0.005(5) 0.012(4) 0.006(5) 
N3 0.012(5) 0.018(6) 0.016(5) 0.005(4) 0.009(4) 0.006(5) 
C1 0.015(6) 0.015(7) 0.010(6) -0.008(5) 0.003(5) 0.001(5) 
C2 0.023(7) 0.052(10) 0.007(6) 0.006(6) 0.004(5) 0.020(7) 
C3 0.015(6) 0.026(8) 0.030(7) 0.013(6) 0.012(6) 0.004(6) 
  
_geom_special_details 
; 
 All esds (except the esd in the dihedral angle between two l.s. planes) 
 are estimated using the full covariance matrix.  The cell esds are taken 
 into account individually in the estimation of esds in distances, angles 
 and torsion angles; correlations between esds in cell parameters are only 
 used when they are defined by crystal symmetry.  An approximate (isotropic) 
 treatment of cell esds is used for estimating esds involving l.s. planes. 
; 
  
loop_ 
 _geom_bond_atom_site_label_1 
 _geom_bond_atom_site_label_2 
 _geom_bond_distance 
 _geom_bond_site_symmetry_2 
 _geom_bond_publ_flag 
W1 N1 2.276(10) . ? 
W1 S4 2.442(3) . ? 
W1 S7 2.450(3) . ? 
W1 S5 2.479(3) 2_776 ? 
W1 S6 2.479(3) . ? 
W1 W2 2.6493(7) . ? 
W1 W3 2.6525(6) . ? 
W1 W3 2.6684(7) 2_776 ? 
W1 W2 2.6714(7) 2_776 ? 
W2 N2 2.293(9) . ? 
W2 S4 2.449(3) . ? 
W2 S7 2.458(3) 2_776 ? 
W2 S6 2.469(2) . ? 
W2 S5 2.474(3) . ? 
W2 W3 2.6554(7) . ? 
W2 W3 2.6664(7) 2_776 ? 
W2 W1 2.6714(7) 2_776 ? 
W3 N3 2.265(10) . ? 
W3 S4 2.436(3) . ? 
W3 S6 2.455(3) 2_776 ? 
W3 S7 2.469(3) . ? 
W3 S5 2.481(3) . ? 
W3 W2 2.6664(7) 2_776 ? 
W3 W1 2.6684(7) 2_776 ? 
S5 W1 2.479(3) 2_776 ? 
S6 W3 2.455(3) 2_776 ? 
S7 W2 2.458(3) 2_776 ? 
N1 C1 1.481(15) . ? 
N2 C2 1.476(16) . ? 
N3 C3 1.477(17) . ? 
  
loop_ 
 _geom_angle_atom_site_label_1 
 _geom_angle_atom_site_label_2 
 _geom_angle_atom_site_label_3 
 _geom_angle 
 _geom_angle_site_symmetry_1 
 _geom_angle_site_symmetry_3 
 _geom_angle_publ_flag 
N1 W1 S4 90.2(3) . . ? 
N1 W1 S7 92.0(3) . . ? 
S4 W1 S7 90.12(10) . . ? 
N1 W1 S5 96.4(3) . 2_776 ? 
S4 W1 S5 173.40(10) . 2_776 ? 
S7 W1 S5 88.96(10) . 2_776 ? 
N1 W1 S6 95.0(3) . . ? 
S4 W1 S6 90.85(10) . . ? 
S7 W1 S6 172.99(10) . . ? 
S5 W1 S6 89.28(10) 2_776 . ? 
N1 W1 W2 133.4(3) . . ? 
S4 W1 W2 57.31(8) . . ? 
S7 W1 W2 117.76(6) . . ? 
S5 W1 W2 117.65(7) 2_776 . ? 
S6 W1 W2 57.45(6) . . ? 
N1 W1 W3 131.7(3) . . ? 
S4 W1 W3 56.94(7) . . ? 
S7 W1 W3 57.71(6) . . ? 
S5 W1 W3 117.38(6) 2_776 . ? 
S6 W1 W3 117.48(6) . . ? 
W2 W1 W3 60.112(18) . . ? 
N1 W1 W3 138.3(3) . 2_776 ? 
S4 W1 W3 117.44(8) . 2_776 ? 
S7 W1 W3 116.78(8) . 2_776 ? 
S5 W1 W3 57.49(8) 2_776 2_776 ? 
S6 W1 W3 56.81(7) . 2_776 ? 
W2 W1 W3 60.187(18) . 2_776 ? 
W3 W1 W3 90.02(2) . 2_776 ? 
N1 W1 W2 136.4(3) . 2_776 ? 
S4 W1 W2 117.01(7) . 2_776 ? 
S7 W1 W2 57.15(8) . 2_776 ? 
S5 W1 W2 57.29(7) 2_776 2_776 ? 
S6 W1 W2 116.43(7) . 2_776 ? 
W2 W1 W2 90.02(2) . 2_776 ? 
W3 W1 W2 60.111(17) . 2_776 ? 
W3 W1 W2 59.641(18) 2_776 2_776 ? 
N2 W2 S4 90.4(3) . . ? 
N2 W2 S7 96.6(3) . 2_776 ? 
S4 W2 S7 172.95(10) . 2_776 ? 
N2 W2 S6 91.9(2) . . ? 
S4 W2 S6 90.94(10) . . ? 
S7 W2 S6 89.43(10) 2_776 . ? 
N2 W2 S5 94.6(2) . . ? 
S4 W2 S5 89.95(10) . . ? 
S7 W2 S5 88.89(10) 2_776 . ? 
S6 W2 S5 173.39(9) . . ? 
N2 W2 W1 131.6(2) . . ? 
S4 W2 W1 57.09(7) . . ? 
S7 W2 W1 117.65(7) 2_776 . ? 
S6 W2 W1 57.82(7) . . ? 
S5 W2 W1 117.67(7) . . ? 
N2 W2 W3 133.6(2) . . ? 
S4 W2 W3 56.84(7) . . ? 
S7 W2 W3 117.00(7) 2_776 . ? 
S6 W2 W3 117.75(7) . . ? 
S5 W2 W3 57.71(7) . . ? 
W1 W2 W3 60.003(18) . . ? 
N2 W2 W3 136.2(2) . 2_776 ? 
S4 W2 W3 117.29(7) . 2_776 ? 
S7 W2 W3 57.43(7) 2_776 2_776 ? 
S6 W2 W3 56.95(7) . 2_776 ? 
S5 W2 W3 117.01(7) . 2_776 ? 
W1 W2 W3 60.262(19) . 2_776 ? 
W3 W2 W3 90.00(2) . 2_776 ? 
N2 W2 W1 138.4(2) . 2_776 ? 
S4 W2 W1 116.92(7) . 2_776 ? 
S7 W2 W1 56.89(7) 2_776 2_776 ? 
S6 W2 W1 116.52(7) . 2_776 ? 
S5 W2 W1 57.44(7) . 2_776 ? 
W1 W2 W1 89.98(2) . 2_776 ? 
W3 W2 W1 60.125(19) . 2_776 ? 
W3 W2 W1 59.594(17) 2_776 2_776 ? 
N3 W3 S4 90.8(3) . . ? 
N3 W3 S6 95.3(3) . 2_776 ? 
S4 W3 S6 173.96(10) . 2_776 ? 
N3 W3 S7 94.3(3) . . ? 
S4 W3 S7 89.84(10) . . ? 
S6 W3 S7 89.51(10) 2_776 . ? 
N3 W3 S5 92.9(3) . . ? 
S4 W3 S5 90.09(10) . . ? 
S6 W3 S5 89.81(10) 2_776 . ? 
S7 W3 S5 172.82(10) . . ? 
N3 W3 W1 133.4(2) . . ? 
S4 W3 W1 57.18(7) . . ? 
S6 W3 W1 117.76(6) 2_776 . ? 
S7 W3 W1 57.04(7) . . ? 
S5 W3 W1 117.32(6) . . ? 
N3 W3 W2 132.9(3) . . ? 
S4 W3 W2 57.30(8) . . ? 
S6 W3 W2 117.92(8) 2_776 . ? 
S7 W3 W2 116.86(7) . . ? 
S5 W3 W2 57.48(7) . . ? 
W1 W3 W2 59.885(18) . . ? 
N3 W3 W2 137.1(3) . 2_776 ? 
S4 W3 W2 117.44(6) . 2_776 ? 
S6 W3 W2 57.48(6) 2_776 2_776 ? 
S7 W3 W2 57.03(8) . 2_776 ? 
S5 W3 W2 116.93(7) . 2_776 ? 
W1 W3 W2 60.296(17) . 2_776 ? 
W2 W3 W2 90.00(2) . 2_776 ? 
N3 W3 W1 136.5(2) . 2_776 ? 
S4 W3 W1 117.49(8) . 2_776 ? 
S6 W3 W1 57.71(8) 2_776 2_776 ? 
S7 W3 W1 116.53(8) . 2_776 ? 
S5 W3 W1 57.41(7) . 2_776 ? 
W1 W3 W1 89.98(2) . 2_776 ? 
W2 W3 W1 60.235(19) . 2_776 ? 
W2 W3 W1 59.553(18) 2_776 2_776 ? 
W2 S5 W1 65.28(7) . 2_776 ? 
W2 S5 W3 64.80(7) . . ? 
W1 S5 W3 65.10(7) 2_776 . ? 
W3 S4 W1 65.88(7) . . ? 
W3 S4 W2 65.87(8) . . ? 
W1 S4 W2 65.60(8) . . ? 
W3 S6 W2 65.57(7) 2_776 . ? 
W3 S6 W1 65.48(7) 2_776 . ? 
W2 S6 W1 64.73(7) . . ? 
W1 S7 W2 65.95(8) . 2_776 ? 
W1 S7 W3 65.26(8) . . ? 
W2 S7 W3 65.54(8) 2_776 . ? 
C1 N1 W1 118.9(8) . . ? 
C2 N2 W2 116.0(8) . . ? 
C3 N3 W3 119.2(7) . . ? 
  
_diffrn_measured_fraction_theta_max    0.937 
_diffrn_reflns_theta_full              24.71 
_diffrn_measured_fraction_theta_full   0.937 
_refine_diff_density_max    2.921 
_refine_diff_density_min   -5.048 
_refine_diff_density_rms    0.652 

#===END
 
data_tbu 
 
_audit_creation_method            SHELXL 
_chemical_name_systematic 
; 
octakis(\mu~3~-sulfido)-hexakis(tert-butylamine)-hexa-tungsten 
tert-butylamine solvate 
; 
_chemical_name_common             'Tungsten Sulfide cluster'  
_chemical_formula_moiety          'W6 S8 (C4H11N)6 (C4H11N)'  
_chemical_formula_structural      ? 
_chemical_formula_analytical      ? 
_chemical_formula_sum             'C32 H88 N8 S8 W6' 
_chemical_formula_weight          1944.68 
_chemical_melting_point           'not measured' 
_chemical_compound_source         ? 
 
loop_ 
 _atom_type_symbol 
 _atom_type_description 
 _atom_type_scat_dispersion_real 
 _atom_type_scat_dispersion_imag 
 _atom_type_scat_source 
 'C'  'C'   0.0033   0.0016 
 'International Tables Vol C Tables 4.2.6.8 and 6.1.1.4' 
 'H'  'H'   0.0000   0.0000 
 'International Tables Vol C Tables 4.2.6.8 and 6.1.1.4' 
 'N'  'N'   0.0061   0.0033 
 'International Tables Vol C Tables 4.2.6.8 and 6.1.1.4' 
 'S'  'S'   0.1246   0.1234 
 'International Tables Vol C Tables 4.2.6.8 and 6.1.1.4' 
 'W'  'W'  -0.8490   6.8722 
 'International Tables Vol C Tables 4.2.6.8 and 6.1.1.4' 
 
_symmetry_cell_setting            monoclinic
_symmetry_space_group_name_H-M    C2/c 
 
loop_ 
 _symmetry_equiv_pos_as_xyz 
 'x, y, z' 
 '-x, y, -z+1/2' 
 'x+1/2, y+1/2, z' 
 '-x+1/2, y+1/2, -z+1/2' 
 '-x, -y, -z' 
 'x, -y, z-1/2' 
 '-x+1/2, -y+1/2, -z' 
 'x+1/2, -y+1/2, z-1/2' 
 
_cell_length_a                    23.1036(4) 
_cell_length_b                    20.8216(3) 
_cell_length_c                    11.497 
_cell_angle_alpha                 90.00 
_cell_angle_beta                  99.7030(10) 
_cell_angle_gamma                 90.00 
_cell_volume                      5451.46(12) 
_cell_formula_units_Z             4 
_cell_measurement_temperature     173(2) 
_cell_measurement_reflns_used     ? 
_cell_measurement_theta_min       ? 
_cell_measurement_theta_max       ? 
 
_exptl_crystal_description        BLOCK
_exptl_crystal_colour             BROWN-RED 
_exptl_crystal_size_max           0.2 
_exptl_crystal_size_mid           0.1 
_exptl_crystal_size_min           0.1 
_exptl_crystal_density_meas       'NOT MEASURED'  
_exptl_crystal_density_diffrn     2.369 
_exptl_crystal_density_method     ? 
_exptl_crystal_F_000              3632 
_exptl_absorpt_coefficient_mu     12.946 
_exptl_absorpt_correction_type    ? 
_exptl_absorpt_correction_T_min   ? 
_exptl_absorpt_correction_T_max   ? 
 
_exptl_special_details 
; 
Absorption correction was done with SADABS beta Version.
This program only gives ratios of max and min absorptions.
; 
 
_diffrn_ambient_temperature       173(2) 
_diffrn_radiation_wavelength      0.71073 
_diffrn_radiation_type            MoK\a 
_diffrn_radiation_source          'fine-focus sealed tube' 
_diffrn_radiation_monochromator   graphite 
_diffrn_measurement_device        ? 
_diffrn_measurement_method        '\w scans' 
_diffrn_standards_number          ? 
_diffrn_standards_interval_count  ? 
_diffrn_standards_interval_time   ? 
_diffrn_standards_decay_%         ? 
_diffrn_reflns_number             15950 
_diffrn_reflns_av_R_equivalents   0.0495 
_diffrn_reflns_av_sigmaI/netI     0.0591 
_diffrn_reflns_limit_h_min        -29 
_diffrn_reflns_limit_h_max        27 
_diffrn_reflns_limit_k_min        -21 
_diffrn_reflns_limit_k_max        26 
_diffrn_reflns_limit_l_min        -14 
_diffrn_reflns_limit_l_max        15 
_diffrn_reflns_theta_min          1.33 
_diffrn_reflns_theta_max          28.19 
_reflns_number_total              5964 
_reflns_number_observed           4914 
_reflns_observed_criterion        >2sigma(I) 
 
_computing_data_collection        'BRUKER SMART' 
_computing_cell_refinement        'Bruker SAINT Plus' 
_computing_data_reduction         SHELXTL
_computing_structure_solution     'SHELXS-86 (Sheldrick, 1990)' 
_computing_structure_refinement   'SHELXL-93 (Sheldrick, 1993)' 
_computing_molecular_graphics     SHELXTL 
_computing_publication_material   SHELXTL 
 
_refine_special_details 
; 
 Refinement on F^2^ for ALL reflections except for 0 with very negative F^2^ 
 or flagged by the user for potential systematic errors.  Weighted R-factors 
 wR and all goodnesses of fit S are based on F^2^, conventional R-factors R 
 are based on F, with F set to zero for negative F^2^. The observed criterion 
 of F^2^ > 2sigma(F^2^) is used only for calculating _R_factor_obs etc. and is 
 not relevant to the choice of reflections for refinement.  R-factors based 
 on F^2^ are statistically about twice as large as those based on F, and R- 
 factors based on ALL data will be even larger. 
; 
 
_refine_ls_structure_factor_coef  Fsqd  
_refine_ls_matrix_type            full 
_refine_ls_weighting_scheme 
 'calc w=1/[\s^2^(Fo^2^)+(0.0398P)^2^+0.0000P] where P=(Fo^2^+2Fc^2^)/3' 
_atom_sites_solution_primary      direct 
_atom_sites_solution_secondary    difmap 
_atom_sites_solution_hydrogens    geom 
_refine_ls_hydrogen_treatment     mixed 
_refine_ls_extinction_method      none 
_refine_ls_extinction_coef        ? 
_refine_ls_number_reflns          5964 
_refine_ls_number_parameters      248 
_refine_ls_number_restraints      2 
_refine_ls_R_factor_all           0.0465 
_refine_ls_R_factor_obs           0.0325 
_refine_ls_wR_factor_all          0.0905 
_refine_ls_wR_factor_obs          0.0747 
_refine_ls_goodness_of_fit_all    1.061 
_refine_ls_goodness_of_fit_obs    0.969 
_refine_ls_restrained_S_all       1.061 
_refine_ls_restrained_S_obs       0.969 
_refine_ls_shift/esd_max          -1.915 
_refine_ls_shift/esd_mean         0.039 
 
loop_ 
 _atom_site_label 
 _atom_site_type_symbol 
 _atom_site_fract_x 
 _atom_site_fract_y 
 _atom_site_fract_z 
 _atom_site_U_iso_or_equiv 
 _atom_site_thermal_displace_type 
 _atom_site_occupancy 
 _atom_site_calc_flag 
 _atom_site_refinement_flags 
 _atom_site_disorder_group 
W1 W 0.292491(12) 0.185523(14) 0.93661(3) 0.00931(9) Uani 1 d . . 
W2 W 0.196316(12) 0.187726(14) 1.03591(3) 0.00904(9) Uani 1 d . . 
W3 W 0.296207(12) 0.237499(14) 1.14942(3) 0.00937(9) Uani 1 d . . 
S1 S 0.28309(8) 0.12126(9) 1.1128(2) 0.0140(4) Uani 1 d . . 
S2 S 0.19639(8) 0.14488(9) 0.8363(2) 0.0129(4) Uani 1 d . . 
S3 S 0.20317(8) 0.24043(9) 1.2294(2) 0.0136(4) Uani 1 d . . 
S4 S 0.38082(8) 0.23539(9) 1.0475(2) 0.0133(4) Uani 1 d . . 
N1 N 0.3347(3) 0.1055(3) 0.8395(6) 0.019(2) Uani 1 d . . 
H1A H 0.3157(15) 0.0783(21) 0.8410(6) 0.023 Uiso 1 calc R . 
H1B H 0.3301(5) 0.1158(8) 0.7790(46) 0.023 Uiso 1 calc R . 
N2 N 0.1397(3) 0.1075(3) 1.0948(6) 0.0145(14) Uani 1 d . . 
H2A H 0.1523(9) 0.0749(22) 1.0714(16) 0.017 Uiso 1 calc R . 
H2B H 0.1484(6) 0.1065(3) 1.1654(46) 0.017 Uiso 1 calc R . 
N3 N 0.3436(3) 0.2232(3) 1.3408(6) 0.020(2) Uani 1 d . . 
H3A H 0.3340(8) 0.2501(20) 1.3731(26) 0.024 Uiso 1 calc R . 
H3B H 0.3299(11) 0.1949(22) 1.3613(17) 0.024 Uiso 1 calc R . 
C1 C 0.3953(3) 0.0773(4) 0.8595(7) 0.022(2) Uani 1 d . . 
C2 C 0.4379(4) 0.1306(5) 0.8450(9) 0.039(3) Uani 1 d . . 
H2B H 0.4293(4) 0.1473(5) 0.7642(9) 0.058 Uiso 1 calc R . 
H2C H 0.4781(4) 0.1138(5) 0.8604(9) 0.058 Uiso 1 calc R . 
H2D H 0.4340(4) 0.1652(5) 0.9009(9) 0.058 Uiso 1 calc R . 
C3 C 0.3988(4) 0.0259(5) 0.7655(9) 0.037(2) Uani 1 d . . 
H3B H 0.3902(4) 0.0454(5) 0.6869(9) 0.055 Uiso 1 calc R . 
H3C H 0.3700(4) -0.0080(5) 0.7718(9) 0.055 Uiso 1 calc R . 
H3D H 0.4383(4) 0.0073(5) 0.7776(9) 0.055 Uiso 1 calc R . 
C4 C 0.4082(5) 0.0506(5) 0.9839(9) 0.048(3) Uani 1 d . . 
H4A H 0.3802(5) 0.0162(5) 0.9922(9) 0.072 Uiso 1 calc R . 
H4B H 0.4044(5) 0.0849(5) 1.0405(9) 0.072 Uiso 1 calc R . 
H4C H 0.4482(5) 0.0335(5) 0.9993(9) 0.072 Uiso 1 calc R . 
C5 C 0.0743(3) 0.0999(4) 1.0704(7) 0.017(2) Uani 1 d . . 
C6 C 0.0552(4) 0.0982(4) 0.9366(8) 0.026(2) Uani 1 d . . 
H6A H 0.0735(4) 0.0613(4) 0.9040(8) 0.038 Uiso 1 calc R . 
H6B H 0.0674(4) 0.1379(4) 0.9021(8) 0.038 Uiso 1 calc R . 
H6C H 0.0124(4) 0.0941(4) 0.9178(8) 0.038 Uiso 1 calc R . 
C7 C 0.0570(4) 0.0372(4) 1.1258(8) 0.026(2) Uani 1 d . . 
H7A H 0.0695(4) 0.0389(4) 1.2115(8) 0.038 Uiso 1 calc R . 
H7B H 0.0762(4) 0.0009(4) 1.0935(8) 0.038 Uiso 1 calc R . 
H7C H 0.0143(4) 0.0317(4) 1.1076(8) 0.038 Uiso 1 calc R . 
C8 C 0.0469(4) 0.1567(4) 1.1258(8) 0.027(2) Uani 1 d . . 
H8A H 0.0600(4) 0.1564(4) 1.2114(8) 0.041 Uiso 1 calc R . 
H8B H 0.0040(4) 0.1531(4) 1.1086(8) 0.041 Uiso 1 calc R . 
H8C H 0.0590(4) 0.1969(4) 1.0927(8) 0.041 Uiso 1 calc R . 
C9 C 0.4076(3) 0.2160(4) 1.3897(7) 0.019(2) Uani 1 d . . 
C10 C 0.4407(4) 0.2725(5) 1.3531(8) 0.028(2) Uani 1 d . . 
H10A H 0.4352(4) 0.2746(5) 1.2667(8) 0.042 Uiso 1 calc R . 
H10B H 0.4826(4) 0.2677(5) 1.3849(8) 0.042 Uiso 1 calc R . 
H10C H 0.4259(4) 0.3121(5) 1.3837(8) 0.042 Uiso 1 calc R . 
C11 C 0.4286(4) 0.1539(5) 1.3394(9) 0.040(3) Uani 1 d . . 
H11A H 0.4067(4) 0.1175(5) 1.3639(9) 0.061 Uiso 1 calc R . 
H11B H 0.4706(4) 0.1481(5) 1.3690(9) 0.061 Uiso 1 calc R . 
H11C H 0.4221(4) 0.1564(5) 1.2531(9) 0.061 Uiso 1 calc R . 
C12 C 0.4154(4) 0.2117(5) 1.5245(8) 0.031(2) Uani 1 d . . 
H12A H 0.3934(4) 0.1747(5) 1.5468(8) 0.046 Uiso 1 calc R . 
H12B H 0.4006(4) 0.2511(5) 1.5558(8) 0.046 Uiso 1 calc R . 
H12C H 0.4571(4) 0.2064(5) 1.5571(8) 0.046 Uiso 1 calc R . 
N1S N 0.2051(3) -0.0259(4) 1.0874(8) 0.028(2) Uani 1 d D . 
H1SA H 0.2331(33) -0.0066(44) 1.1027(87) 0.033 Uiso 1 d D . 
H1SB H 0.1889(38) -0.0412(45) 1.1463(72) 0.033 Uiso 1 d D . 
C1S C 0.2079(4) -0.0726(4) 0.9920(7) 0.022(2) Uani 1 d . . 
C2S C 0.1477(4) -0.1021(4) 0.9568(9) 0.034(2) Uani 1 d . . 
H2SA H 0.1364(4) -0.1242(4) 1.0248(9) 0.051 Uiso 1 calc R . 
H2SB H 0.1485(4) -0.1330(4) 0.8928(9) 0.051 Uiso 1 calc R . 
H2SC H 0.1191(4) -0.0683(4) 0.9298(9) 0.051 Uiso 1 calc R . 
C3S C 0.2526(4) -0.1254(5) 1.0320(9) 0.039(3) Uani 1 d . . 
H3SA H 0.2917(4) -0.1063(5) 1.0546(9) 0.058 Uiso 1 calc R . 
H3SB H 0.2533(4) -0.1559(5) 0.9672(9) 0.058 Uiso 1 calc R . 
H3SC H 0.2417(4) -0.1480(5) 1.0998(9) 0.058 Uiso 1 calc R . 
C4S C 0.2274(4) -0.0375(5) 0.8903(9) 0.043(3) Uiso 1 d . . 
H4SA H 0.2664(4) -0.0189(5) 0.9163(9) 0.064 Uiso 1 calc R . 
H4SB H 0.1994(4) -0.0031(5) 0.8631(9) 0.064 Uiso 1 calc R . 
H4SC H 0.2290(4) -0.0676(5) 0.8254(9) 0.064 Uiso 1 calc R . 
 
loop_ 
 _atom_site_aniso_label 
 _atom_site_aniso_U_11 
 _atom_site_aniso_U_22 
 _atom_site_aniso_U_33 
 _atom_site_aniso_U_23 
 _atom_site_aniso_U_13 
 _atom_site_aniso_U_12 
W1 0.00766(15) 0.0094(2) 0.0116(2) 0.00001(11) 0.00384(12) -0.00098(11) 
W2 0.00700(15) 0.0094(2) 0.0115(2) 0.00034(11) 0.00390(12) -0.00250(11) 
W3 0.00729(15) 0.01067(15) 0.0105(2) 0.00099(12) 0.00258(11) -0.00159(11) 
S1 0.0127(9) 0.0122(9) 0.0176(10) 0.0019(8) 0.0036(8) -0.0006(7) 
S2 0.0118(9) 0.0123(9) 0.0148(10) -0.0012(8) 0.0029(7) -0.0035(7) 
S3 0.0148(9) 0.0152(9) 0.0118(10) 0.0006(7) 0.0048(7) -0.0018(7) 
S4 0.0070(9) 0.0159(9) 0.0177(10) 0.0001(8) 0.0041(7) -0.0014(7) 
N1 0.021(4) 0.019(4) 0.018(4) -0.008(3) 0.007(3) 0.000(3) 
N2 0.012(3) 0.016(3) 0.018(4) 0.000(3) 0.011(3) -0.007(3) 
N3 0.021(4) 0.025(4) 0.015(4) 0.009(3) 0.003(3) -0.006(3) 
C1 0.020(4) 0.028(5) 0.019(5) 0.000(4) 0.008(4) 0.007(4) 
C2 0.026(5) 0.045(6) 0.051(7) -0.022(5) 0.025(5) -0.009(4) 
C3 0.035(6) 0.030(6) 0.047(7) -0.014(5) 0.013(5) 0.007(4) 
C4 0.047(7) 0.055(7) 0.047(7) 0.017(6) 0.022(6) 0.028(5) 
C5 0.010(4) 0.019(4) 0.023(5) 0.001(3) 0.008(3) -0.003(3) 
C6 0.021(4) 0.022(5) 0.032(5) 0.003(4) 0.001(4) -0.011(4) 
C7 0.026(5) 0.022(5) 0.031(5) 0.006(4) 0.011(4) -0.012(4) 
C8 0.022(5) 0.027(5) 0.036(6) 0.002(4) 0.016(4) -0.002(4) 
C9 0.011(4) 0.025(5) 0.021(5) 0.002(4) 0.000(3) 0.007(3) 
C10 0.013(4) 0.045(6) 0.025(5) -0.007(4) 0.004(4) -0.011(4) 
C11 0.050(6) 0.029(6) 0.039(6) 0.001(5) -0.002(5) 0.020(5) 
C12 0.027(5) 0.045(6) 0.019(5) 0.007(4) -0.004(4) -0.002(4) 
N1S 0.030(5) 0.023(4) 0.032(5) -0.006(4) 0.011(4) -0.002(3) 
C1S 0.033(5) 0.019(4) 0.015(4) 0.005(3) 0.005(4) -0.001(4) 
C2S 0.034(5) 0.033(6) 0.034(6) -0.011(5) 0.006(4) -0.008(4) 
C3S 0.038(6) 0.045(7) 0.032(6) -0.006(5) 0.004(5) 0.021(5) 
 
_geom_special_details 
; 
 All esds (except the esd in the dihedral angle between two l.s. planes) 
 are estimated using the full covariance matrix.  The cell esds are taken 
 into account individually in the estimation of esds in distances, angles 
 and torsion angles; correlations between esds in cell parameters are only 
 used when they are defined by crystal symmetry.  An approximate (isotropic) 
 treatment of cell esds is used for estimating esds involving l.s. planes. 
; 
 
loop_ 
 _geom_bond_atom_site_label_1 
 _geom_bond_atom_site_label_2 
 _geom_bond_distance 
 _geom_bond_site_symmetry_2 
 _geom_bond_publ_flag 
W1 N1 2.311(6) . ? 
W1 S4 2.448(2) . ? 
W1 S1 2.467(2) . ? 
W1 S3 2.469(2) 7_557 ? 
W1 S2 2.473(2) . ? 
W1 W3 2.6577(4) 7_557 ? 
W1 W3 2.6635(4) . ? 
W1 W2 2.6642(4) . ? 
W1 W2 2.6654(4) 7_557 ? 
W2 N2 2.292(6) . ? 
W2 S3 2.462(2) . ? 
W2 S2 2.463(2) . ? 
W2 S4 2.466(2) 7_557 ? 
W2 S1 2.473(2) . ? 
W2 W3 2.6623(4) . ? 
W2 W1 2.6654(4) 7_557 ? 
W2 W3 2.6680(4) 7_557 ? 
W3 N3 2.305(6) . ? 
W3 S4 2.443(2) . ? 
W3 S2 2.459(2) 7_557 ? 
W3 S1 2.467(2) . ? 
W3 S3 2.477(2) . ? 
W3 W1 2.6577(4) 7_557 ? 
W3 W2 2.6680(4) 7_557 ? 
S2 W3 2.459(2) 7_557 ? 
S3 W1 2.469(2) 7_557 ? 
S4 W2 2.466(2) 7_557 ? 
N1 C1 1.500(10) . ? 
N2 C5 1.499(9) . ? 
N3 C9 1.498(9) . ? 
C1 C4 1.516(12) . ? 
C1 C2 1.510(12) . ? 
C1 C3 1.533(12) . ? 
C5 C6 1.528(12) . ? 
C5 C8 1.529(11) . ? 
C5 C7 1.535(11) . ? 
C9 C10 1.502(12) . ? 
C9 C12 1.533(12) . ? 
C9 C11 1.529(12) . ? 
N1S C1S 1.475(11) . ? 
C1S C2S 1.512(12) . ? 
C1S C4S 1.512(12) . ? 
C1S C3S 1.526(12) . ? 
 
loop_ 
 _geom_angle_atom_site_label_1 
 _geom_angle_atom_site_label_2 
 _geom_angle_atom_site_label_3 
 _geom_angle 
 _geom_angle_site_symmetry_1 
 _geom_angle_site_symmetry_3 
 _geom_angle_publ_flag 
N1 W1 S4 100.1(2) . . ? 
N1 W1 S1 96.2(2) . . ? 
S4 W1 S1 89.06(6) . . ? 
N1 W1 S3 90.1(2) . 7_557 ? 
S4 W1 S3 89.94(6) . 7_557 ? 
S1 W1 S3 173.71(6) . 7_557 ? 
N1 W1 S2 86.9(2) . . ? 
S4 W1 S2 172.99(6) . . ? 
S1 W1 S2 90.06(6) . . ? 
S3 W1 S2 90.18(6) 7_557 . ? 
N1 W1 W3 128.1(2) . 7_557 ? 
S4 W1 W3 117.45(5) . 7_557 ? 
S1 W1 W3 117.61(4) . 7_557 ? 
S3 W1 W3 57.65(4) 7_557 7_557 ? 
S2 W1 W3 57.14(4) . 7_557 ? 
N1 W1 W3 141.8(2) . . ? 
S4 W1 W3 56.92(5) . . ? 
S1 W1 W3 57.32(5) . . ? 
S3 W1 W3 117.22(5) 7_557 . ? 
S2 W1 W3 117.07(5) . . ? 
W3 W1 W3 90.016(13) 7_557 . ? 
N1 W1 W2 132.0(2) . . ? 
S4 W1 W2 116.86(5) . . ? 
S1 W1 W2 57.48(4) . . ? 
S3 W1 W2 117.78(5) 7_557 . ? 
S2 W1 W2 57.16(5) . . ? 
W3 W1 W2 60.175(11) 7_557 . ? 
W3 W1 W2 59.963(11) . . ? 
N1 W1 W2 137.0(2) . 7_557 ? 
S4 W1 W2 57.49(4) . 7_557 ? 
S1 W1 W2 117.38(5) . 7_557 ? 
S3 W1 W2 57.15(5) 7_557 7_557 ? 
S2 W1 W2 117.12(4) . 7_557 ? 
W3 W1 W2 60.019(11) 7_557 7_557 ? 
W3 W1 W2 60.088(11) . 7_557 ? 
W2 W1 W2 90.196(12) . 7_557 ? 
N2 W2 S3 90.6(2) . . ? 
N2 W2 S2 95.8(2) . . ? 
S3 W2 S2 173.56(6) . . ? 
N2 W2 S4 100.2(2) . 7_557 ? 
S3 W2 S4 89.67(6) . 7_557 ? 
S2 W2 S4 89.24(6) . 7_557 ? 
N2 W2 S1 87.4(2) . . ? 
S3 W2 S1 90.10(6) . . ? 
S2 W2 S1 90.14(6) . . ? 
S4 W2 S1 172.37(6) 7_557 . ? 
N2 W2 W3 129.0(2) . . ? 
S3 W2 W3 57.66(4) . . ? 
S2 W2 W3 117.46(4) . . ? 
S4 W2 W3 116.60(5) 7_557 . ? 
S1 W2 W3 57.26(4) . . ? 
N2 W2 W1 132.3(2) . . ? 
S3 W2 W1 117.62(5) . . ? 
S2 W2 W1 57.50(4) . . ? 
S4 W2 W1 116.41(4) 7_557 . ? 
S1 W2 W1 57.26(5) . . ? 
W3 W2 W1 60.005(11) . . ? 
N2 W2 W1 137.3(2) . 7_557 ? 
S3 W2 W1 57.41(4) . 7_557 ? 
S2 W2 W1 116.99(4) . 7_557 ? 
S4 W2 W1 56.82(4) 7_557 7_557 ? 
S1 W2 W1 117.07(4) . 7_557 ? 
W3 W2 W1 59.847(11) . 7_557 ? 
W1 W2 W1 89.804(12) . 7_557 ? 
N2 W2 W3 141.1(2) . 7_557 ? 
S3 W2 W3 117.30(5) . 7_557 ? 
S2 W2 W3 57.10(4) . 7_557 ? 
S4 W2 W3 56.67(4) 7_557 7_557 ? 
S1 W2 W3 117.01(5) . 7_557 ? 
W3 W2 W3 89.820(12) . 7_557 ? 
W1 W2 W3 59.793(11) . 7_557 ? 
W1 W2 W3 59.921(11) 7_557 7_557 ? 
N3 W3 S4 99.5(2) . . ? 
N3 W3 S2 92.8(2) . 7_557 ? 
S4 W3 S2 89.87(6) . 7_557 ? 
N3 W3 S1 93.5(2) . . ? 
S4 W3 S1 89.17(6) . . ? 
S2 W3 S1 173.72(6) 7_557 . ? 
N3 W3 S3 87.2(2) . . ? 
S4 W3 S3 173.25(6) . . ? 
S2 W3 S3 90.31(6) 7_557 . ? 
S1 W3 S3 89.91(6) . . ? 
N3 W3 W1 130.2(2) . 7_557 ? 
S4 W3 W1 117.48(5) . 7_557 ? 
S2 W3 W1 57.64(4) 7_557 7_557 ? 
S1 W3 W1 117.60(5) . 7_557 ? 
S3 W3 W1 57.35(4) . 7_557 ? 
N3 W3 W2 130.6(2) . . ? 
S4 W3 W2 117.09(5) . . ? 
S2 W3 W2 117.73(4) 7_557 . ? 
S1 W3 W2 57.51(4) . . ? 
S3 W3 W2 57.11(5) . . ? 
W1 W3 W2 60.133(11) 7_557 . ? 
N3 W3 W1 139.5(2) . . ? 
S4 W3 W1 57.08(5) . . ? 
S2 W3 W1 117.22(5) 7_557 . ? 
S1 W3 W1 57.34(5) . . ? 
S3 W3 W1 117.10(5) . . ? 
W1 W3 W1 89.984(13) 7_557 . ? 
W2 W3 W1 60.032(11) . . ? 
N3 W3 W2 138.9(2) . 7_557 ? 
S4 W3 W2 57.50(5) . 7_557 ? 
S2 W3 W2 57.25(5) 7_557 7_557 ? 
S1 W3 W2 117.31(5) . 7_557 ? 
S3 W3 W2 117.34(5) . 7_557 ? 
W1 W3 W2 60.033(11) 7_557 7_557 ? 
W2 W3 W2 90.180(12) . 7_557 ? 
W1 W3 W2 59.992(11) . 7_557 ? 
W3 S1 W1 65.35(5) . . ? 
W3 S1 W2 65.22(5) . . ? 
W1 S1 W2 65.26(5) . . ? 
W3 S2 W2 65.65(5) 7_557 . ? 
W3 S2 W1 65.22(4) 7_557 . ? 
W2 S2 W1 65.34(5) . . ? 
W2 S3 W1 65.44(5) . 7_557 ? 
W2 S3 W3 65.23(5) . . ? 
W1 S3 W3 65.00(5) 7_557 . ? 
W3 S4 W1 65.99(4) . . ? 
W3 S4 W2 65.84(5) . 7_557 ? 
W1 S4 W2 65.70(5) . 7_557 ? 
C1 N1 W1 131.8(5) . . ? 
C5 N2 W2 129.0(5) . . ? 
C9 N3 W3 130.6(5) . . ? 
N1 C1 C4 108.5(7) . . ? 
N1 C1 C2 107.8(7) . . ? 
C4 C1 C2 110.3(8) . . ? 
N1 C1 C3 108.8(7) . . ? 
C4 C1 C3 112.5(8) . . ? 
C2 C1 C3 108.8(7) . . ? 
N2 C5 C6 107.6(6) . . ? 
N2 C5 C8 108.4(6) . . ? 
C6 C5 C8 111.6(7) . . ? 
N2 C5 C7 109.7(6) . . ? 
C6 C5 C7 110.2(7) . . ? 
C8 C5 C7 109.3(7) . . ? 
C10 C9 N3 109.5(7) . . ? 
C10 C9 C12 110.5(7) . . ? 
N3 C9 C12 109.0(7) . . ? 
C10 C9 C11 110.3(8) . . ? 
N3 C9 C11 107.4(7) . . ? 
C12 C9 C11 110.0(8) . . ? 
N1S C1S C2S 108.3(7) . . ? 
N1S C1S C4S 108.2(7) . . ? 
C2S C1S C4S 111.7(8) . . ? 
N1S C1S C3S 111.3(7) . . ? 
C2S C1S C3S 109.5(8) . . ? 
C4S C1S C3S 107.8(8) . . ? 
 
_refine_diff_density_max    1.354 
_refine_diff_density_min   -3.972 
_refine_diff_density_rms    0.542 

#===END

#Submission Details 

data_global 
_publ_contact_author 
; 
Prof. Francis J. DiSalvo 
Department of Chemistry and Chemical Biology 
Cornell University 
Ithaca, NY 14853 
; 
  
_publ_contact_email    fjd3@cornell.edu 
_publ_contact_author_fax   '607-255-4137' 
_publ_contact_author_phone  '607-255-7238' 
  
  
_publ_contact_letter 
; 
This is a CIF submission as the Supporting Information for the paper 
submitted for publication in Inorganic chemistry (Ms. IC001314Q) 
; 
  
_publ_requested_journal      'Inorganic Chemistry' 
  
  
#  Title and Author List 
  
_publ_section_title 
; 
Synthesis, Characterization and Ligand Exchange Studies of 
W6S8L6 Cluster Compounds
; 
  
loop_ 
_publ_author_name 
'Jin, Song'
'Zhou, Ran'
'Scheuer, Ellen M.'
'Adamchuk, Jennifer'
'Rayburn, Lori L.' 
'DiSalvo, Francis J.' 
  
_publ_author_address 
; 
Department of Chemistry and Chemical Biology 
Cornell University 
Ithaca, NY 14853 
; 
  
#====END
